# Supplementary material for: Convergent total synthesis of corallocin A
Source: Royal Society of Chemistry journal article supplement (doi:10.1039/d1ob00451d), 2021-01-01
Supplement: d1ob00451d1.pdf [file d1ob00451d1.pdf]

Supporting Information

## Convergent total synthesis of corallocin A

Tomoya Mashiko, Yuta Nakazato, Yuta Katsumura, Akihiko Kasamatsu, Shinya Adachi, Shogo Kamo, Akinobu Matsuzawa and Kazuyuki Sugita\*

Department of Synthetic Medicinal Chemistry, Faculty of Pharmaceutical Sciences, Hoshi University

### Table of Contents

|                                                          |    |
|----------------------------------------------------------|----|
| <b>1. General</b>                                        | 2  |
| <b>2. Experimental Procedures and Spectroscopic Data</b> | 2  |
| <b>3. <sup>1</sup>H and <sup>13</sup>C NMR charts</b>    | 11 |
| <b>4. References</b>                                     | 44 |

## 1. General

All reactions were carried out in a round-bottom flask or a test tube fitted with a 3-way glass stopcock under Ar atmosphere unless otherwise stated. Flash chromatography was performed using silica gel 60N (particle size: 40-50  $\mu\text{m}$ ) purchased from Kanto Chemical unless otherwise stated. All work-up and purification procedures were carried out with reagent-grade solvents under ambient atmosphere. Reagents were purchased from commercial suppliers and used as received unless otherwise stated. Melting point (Mp) data were determined using a Yanaco MP apparatus and were uncorrected. IR spectra were recorded on a JASCO FT/IR 4100 spectrometer.  $^1\text{H}$  and  $^{13}\text{C}$  NMR spectra were recorded on JEOL ECA-600 or Bruker AVIII 400 spectrometers, using  $\text{CDCl}_3$  or acetone- $d_6$  as solvent. Chemical shift values are reported in  $\delta$  (ppm) relative to residual solvent signals ( $\text{CDCl}_3$ : 7.26 ppm for  $^1\text{H}$  and 77.0 ppm for  $^{13}\text{C}$ , acetone- $d_6$ : 2.04 ppm for  $^1\text{H}$  and 29.8 ppm for  $^{13}\text{C}$ ). NMR data are reported as follows: chemical shifts, multiplicity (s: singlet, d: doublet, t: triplet, q: quartet, m: multiplet, br: broad signal), coupling constant, and integration. High-resolution mass spectra (ESI-TOF) were measured on JEOL JMS-T100LP.

## 2. Experimental Procedures

### Methyl 2-formyl-3-hydroxy-5-methoxybenzoate (**7**)<sup>(S1)</sup>

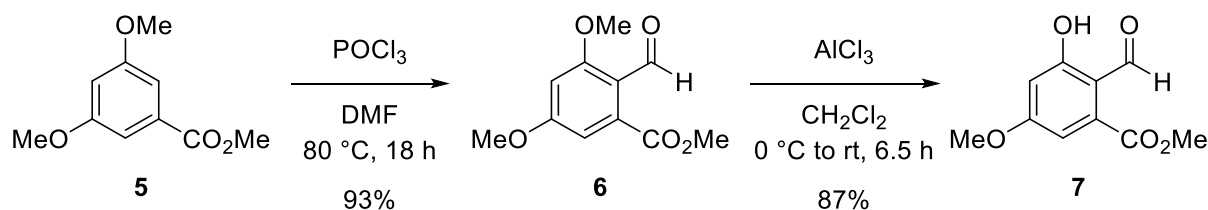

The title compound **7** was prepared by following the literature procedure with slightly modification in 81% overall yield.

Phosphoryl chloride ( $\text{POCl}_3$ , 2.84 mL, 30.6 mmol) was added portion-wise to  $\text{DMF}$  (4.0 mL) at  $0\text{ }^\circ\text{C}$ . To the resultant mixture was added methyl 3,5-dimethoxybenzoate **5** (1.00 g, 5.10 mmol) at  $0\text{ }^\circ\text{C}$ , the reaction mixture was stirred for 18 h at  $80\text{ }^\circ\text{C}$ . The reaction was cooled to  $0\text{ }^\circ\text{C}$ , and quenched by the addition of sat.  $\text{NaOAc}$  aq. (50.0 mL) to give a precipitate. Filtration and washing with  $\text{H}_2\text{O}$  gave aldehyde **6** (1.07 g, 4.77 mmol, 93%) as a gray solid.

A solution of aldehyde **6** (104 mg, 464  $\mu\text{mol}$ ) in  $\text{CH}_2\text{Cl}_2$  (3.0 mL) was added portion-wise to a solution of  $\text{AlCl}_3$  (314 mg, 2.35 mmol) in  $\text{CH}_2\text{Cl}_2$  (3.0 mL) at  $0\text{ }^\circ\text{C}$ . The resultant mixture was stirred for 6.5 h at room temperature. The reaction mixture was poured into ice water and diluted with  $\text{CH}_2\text{Cl}_2$ . After the layers were separated, the aqueous layer was extracted with  $\text{CH}_2\text{Cl}_2$ . The combined organic solution was washed with brine, dried over  $\text{Na}_2\text{SO}_4$ , filtered, and concentrated to give a residue. The residue was purified by flash column chromatography (Hexane/ $\text{EtOAc}$  = 3/2) to give **7** (81.3 mg, 387  $\mu\text{mol}$ , 87%) as a white solid. The structure of **7** was confirmed by comparison of its  $^1\text{H}$  NMR spectrum with that reported<sup>(S1)</sup>

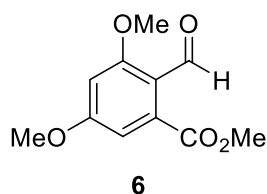

Mp = 104–106 °C; IR (neat)  $\nu_{\max}$  = 2952, 2893, 1732, 1671, 1600, 1339, 1221, 1137, 1065  $\text{cm}^{-1}$ ;  $^1\text{H}$  NMR (600 MHz,  $\text{CDCl}_3$ )  $\delta$  10.29 (s, 1H), 6.56 (d,  $J$  = 1.8 Hz, 1H), 6.51 (d,  $J$  = 1.8 Hz, 1H), 3.91 (s, 3H), 3.90 (s, 3H), 3.87 (s, 3H);  $^{13}\text{C}$  NMR (150 MHz,  $\text{CDCl}_3$ )  $\delta$  187.7, 169.5, 165.0, 163.2, 136.6, 116.6, 105.1, 99.5, 56.0, 55.8, 52.9.; HRMS (ESI)  $m/z$  calcd. for  $\text{C}_{11}\text{H}_{12}\text{O}_5\text{Na}$  ( $[\text{M}+\text{Na}]^+$ ) 247.0577, found 247.0573.

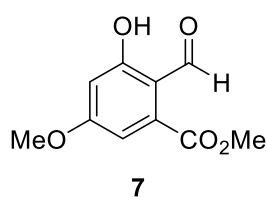

Mp = 71–72 °C; IR (neat)  $\nu_{\max}$  = 2953, 2842, 1769, 1717, 1635, 1623, 1378, 1147  $\text{cm}^{-1}$ ;  $^1\text{H}$  NMR (400 MHz,  $\text{CDCl}_3$ )  $\delta$  12.72 (s, 1H), 10.41 (s, 1H), 7.00 (d,  $J$  = 2.4 Hz, 1H), 6.53 (d,  $J$  = 2.4 Hz, 1H), 3.93 (s, 3H), 3.86 (s, 3H);  $^{13}\text{C}$  NMR (150 MHz,  $\text{CDCl}_3$ )  $\delta$  195.5, 166.4, 166.1, 165.3, 135.1, 112.7, 111.9, 103.9, 55.9, 52.8.; HRMS (ESI)  $m/z$  calcd. for  $\text{C}_{10}\text{H}_{11}\text{O}_5$  ( $[\text{M}+\text{H}]^+$ ) 211.0601, found 211.0598.

#### Methyl 2-formyl-3-hydroxy-4-iodo-5-methoxybenzoate (**8**)

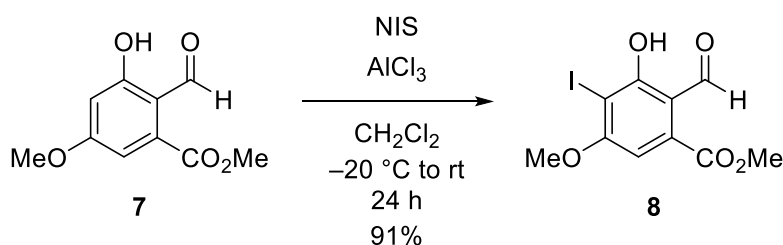

To a solution of **7** (3.6 mg, 17  $\mu\text{mol}$ ) in  $\text{CH}_2\text{Cl}_2$  (1.0 mL) was added  $\text{AlCl}_3$  (2.3 mg, 14  $\mu\text{mol}$ ) at  $-20\text{ }^\circ\text{C}$ . After stirring for 15 min at same temperature, *N*-iodosuccinimide (NIS, 4.6 mg, 20  $\mu\text{mol}$ ) was added. The reaction was allowed to warm to room temperature and stirred for 24 h in the dark. The reaction was quenched by the addition of 1 M HCl aq. and diluted with  $\text{CH}_2\text{Cl}_2$ . After the layers were separated, the aqueous layer was extracted with  $\text{CH}_2\text{Cl}_2$ . The combined organic solution was washed with brine, dried over  $\text{Na}_2\text{SO}_4$ , filtered, and concentrated to give a residue. The residue was purified by flash column chromatography (Hexane/EtOAc = 5/1 to 1/1) to give **8** (5.2 mg, 16  $\mu\text{mol}$ , 91%) as a white solid.

Mp = 170.1–172.0 °C; IR (KBr)  $\nu_{\max}$  = 2958, 2924, 2855, 1708, 1629, 1488, 1254, 1177, 803, 786  $\text{cm}^{-1}$ ;  $^1\text{H}$  NMR (400 MHz,  $\text{CDCl}_3$ )  $\delta$  13.47 (s, 1H), 10.40 (s, 1H), 7.02 (s, 1H), 4.04 (s, 3H), 3.98 (s, 3H);  $^{13}\text{C}$  NMR (150 MHz,  $\text{CDCl}_3$ )  $\delta$  195.4, 165.8, 164.2, 164.0, 135.6, 113.3, 105.7, 81.6, 57.1, 53.1; HRMS (ESI)  $m/z$  calcd. for  $\text{C}_{10}\text{H}_8\text{IO}_5$  ( $[\text{M}-\text{H}]^-$ ) 334.9422, found 334.9427.

#### 4-Hydroxy-5-iodo-6-methoxyisobenzofuran-1(3H)-one (**9**)<sup>(S2)</sup>

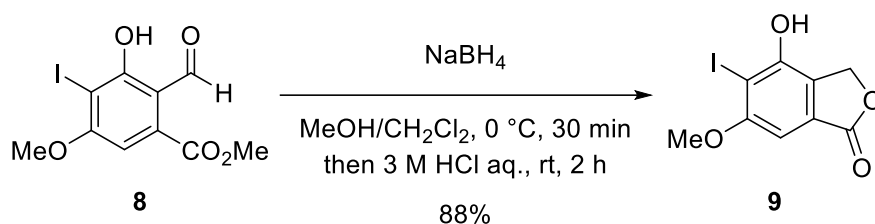

To a solution of **8** (5.0 mg, 15 μmol) in MeOH (400 μL) and CH<sub>2</sub>Cl<sub>2</sub> (400 μL) was added NaBH<sub>4</sub> (3.4 mg, 89 μmol) at 0 °C. After the reaction mixture was stirred for 30 min at same temperature, 3 M HCl aq. (250 μL) was added and stirred for 2 h at room temperature. The reaction mixture was quenched by the addition of water and diluted with CH<sub>2</sub>Cl<sub>2</sub>. After the layers were separated, the aqueous layer was extracted with CH<sub>2</sub>Cl<sub>2</sub>. The combined organic solution was washed with brine, dried over Na<sub>2</sub>SO<sub>4</sub>, filtered, and concentrated to give a residue. The residue was purified by flash column chromatography (Hexane/EtOAc = 2/1 to 1/1) to give **9** (4.0 mg, 13 μmol, 88%) as a white solid. The structure of **9** was confirmed by comparison of its <sup>1</sup>H NMR spectrum with that reported<sup>(S2)</sup>.

Mp = 185–187 °C; IR (neat) ν<sub>max</sub> = 3114, 2948, 1749, 1716, 1471, 1350, 1117 cm<sup>-1</sup>; <sup>1</sup>H NMR (600 MHz, CDCl<sub>3</sub>) δ 6.89 (s, 1H), 5.85 (s, 1H), 5.27 (s, 2H), 3.96 (s, 3H); <sup>13</sup>C NMR (150 MHz, CDCl<sub>3</sub>) δ 170.6, 160.0, 150.6, 128.4, 125.1, 98.2, 85.8, 67.8, 57.1.; HRMS (ESI) *m/z* calcd. for C<sub>9</sub>H<sub>8</sub>IO<sub>4</sub> ([M+H]<sup>+</sup>) 306.9462, found 306.9458.

#### 5-Iodo-6-methoxy-4-(methoxymethoxy)isobenzofuran-1(3H)-one (**4**)<sup>(S2)</sup>

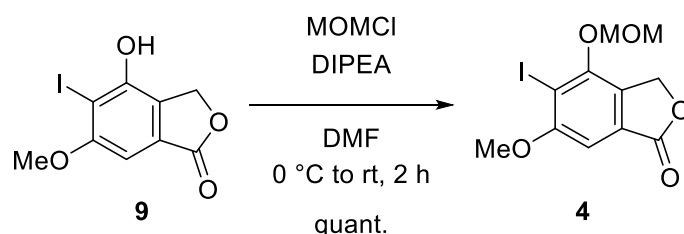

To a solution of **9** (70.0 mg, 229 μmol) in DMF (2.3 mL) was added DIPEA (155 μL, 890 μmol) and MOMCl (33.5 μL, 444 μmol) at 0 °C. The reaction mixture was stirred for 2 h at room temperature. The reaction was quenched by the addition of sat. NH<sub>4</sub>Cl aq. and diluted with EtOAc. After the layers were separated, the aqueous layer was extracted with EtOAc. The combined organic solution was washed with brine, dried over Na<sub>2</sub>SO<sub>4</sub>, filtered, and concentrated to give a residue. The residue was purified by flash column chromatography (Hexane/EtOAc = 5/1 to 2/1) to give **4** (80.0 mg, 228 μmol, quant.) as a white solid. The structure of **4** was confirmed by comparison of its <sup>1</sup>H NMR spectrum with that reported<sup>(S2)</sup>.

Mp = 127–129 °C; IR (neat) ν<sub>max</sub> = 2947, 1771, 1753, 1470, 1389, 1152, 1102 cm<sup>-1</sup>; <sup>1</sup>H NMR (600 MHz, CDCl<sub>3</sub>) δ 7.07 (s, 1H), 5.39 (s, 2H), 5.17 (s, 2H), 3.97 (s, 3H), 3.57 (s, 3H); <sup>13</sup>C NMR (150 MHz, CDCl<sub>3</sub>) δ 170.4, 160.7, 152.6, 128.6 (2C), 101.3, 97.5, 91.5, 68.5, 57.3, 57.1; <sup>13</sup>C NMR (150 MHz, acetone-*d*<sub>6</sub>) δ 171.1, 162.5, 154.2, 130.3, 130.0, 102.3, 98.6, 91.9, 69.8, 58.3, 58.2; HRMS (ESI) *m/z* calcd. for C<sub>11</sub>H<sub>12</sub>IO<sub>5</sub> ([M+H]<sup>+</sup>) 350.9724, found 350.9711.

**(E)-6-(Methoxymethoxy)-4-methylhex-4-enal (**12**)**<sup>(S3)</sup>

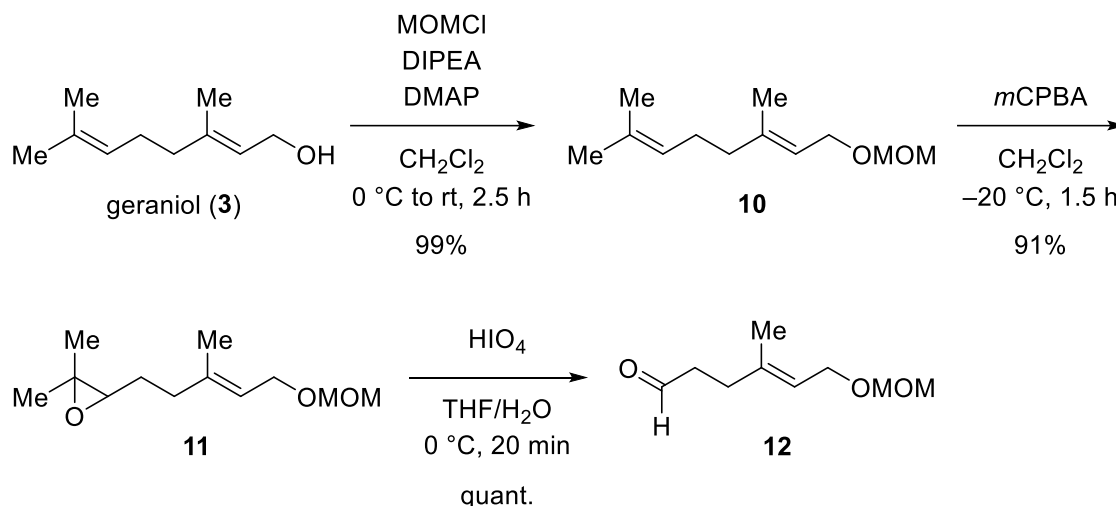

The title compound **12** was prepared by following the procedure reported by Hernández-Galán R. et al with slightly modification in 90% overall yield.

To a solution of geraniol (**3**) (2.00 g, 13.0 mmol), DIPEA (4.80 mL, 27.6 mmol), and DMAP (159 mg, 1.30 mmol) in CH<sub>2</sub>Cl<sub>2</sub> (65.0 mL) was added MOMCl (1.96 mL, 26.0 mmol) at 0 °C. The resultant mixture was stirred for 2.5 h at room temperature. The reaction was quenched by the addition of sat. NH<sub>4</sub>Cl aq. After the layers were separated, the aqueous layer was extracted with CH<sub>2</sub>Cl<sub>2</sub>. The combined organic solution was washed with brine, dried over Na<sub>2</sub>SO<sub>4</sub>, filtered, and concentrated to give a residue. The residue was purified by flash column chromatography (Hexane/EtOAc = 29/1 to 19/1) to give MOM ether **10** (2.55 g, 12.9 mmol, 99%) as a colorless oil.

A solution of **10** (1.20 g, 6.06 mmol) in CH<sub>2</sub>Cl<sub>2</sub> (12.0 mL) was added to a stirred solution of *m*CPBA (1.77 g, 6.66 mmol) in CH<sub>2</sub>Cl<sub>2</sub> (30.0 mL) at -20 °C. The resultant mixture was stirred for 1.5 h at same temperature. The reaction was quenched by the addition of 1 M NaOH aq. After the layers were separated, the aqueous layer was extracted with CH<sub>2</sub>Cl<sub>2</sub>. The combined organic solution was washed with brine, dried over Na<sub>2</sub>SO<sub>4</sub>, filtered, and concentrated to give a residue. The residue was purified by flash column chromatography (Hexane/EtOAc = 9/1 to 4/1) to give epoxide **11** (1.18 g, 5.51 mmol, 91%) as a colorless oil.

A solution of **11** (1.18 g, 5.51 mmol) in THF (11.0 mL) was added to a solution of HIO<sub>4</sub> (1.51 g, 6.61 mmol) in H<sub>2</sub>O (5.5 mL) at 0 °C. The resultant mixture was stirred for 20 min at same temperature. The reaction was quenched by the addition of Brine and diluted with EtOAc. After the layers were separated, the aqueous layer was extracted with EtOAc. The combined organic solution was washed with sat. NaHCO<sub>3</sub> aq., dried over Na<sub>2</sub>SO<sub>4</sub>, filtered, and concentrated to give aldehyde **12** (948 mg, 5.50 mmol, quant.) as a colorless oil. The structure of **12** was confirmed by comparison of its <sup>1</sup>H NMR spectrum with that reported<sup>(S3)</sup>.

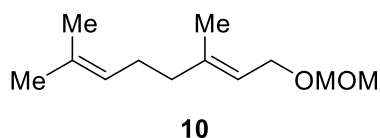

IR (neat)  $\nu_{\max}$  = 2927, 2882, 1448, 1379, 1149, 1104, 1050 cm<sup>-1</sup>; <sup>1</sup>H NMR (600 MHz, CDCl<sub>3</sub>)  $\delta$  5.34–5.36 (m, 1H), 5.09 (tt, *J* = 6.6, 1.2 Hz, 1H), 4.63 (s, 2H), 4.07 (d, *J* = 6.6 Hz, 2H), 3.37 (s, 3H), 2.12–2.03 (m, 4H), 1.68 (s, 3H), 1.67 (s, 3H), 1.60 (s, 3H); <sup>13</sup>C NMR (150 MHz, CDCl<sub>3</sub>)  $\delta$  140.9, 131.7, 123.9, 120.1, 95.4, 63.6, 55.1, 39.6,

26.3, 25.7, 17.6, 16.3. ; HRMS (ESI)  $m/z$  calcd. for  $C_{12}H_{22}O_2Na$  ( $[M+Na]^+$ ) 221.1512, found 221.1520.

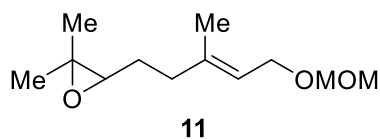

IR (neat)  $\nu_{max}$  = 2958, 2927, 2883, 1457, 1379, 1149, 1103, 1044  $cm^{-1}$ ;  $^1H$  NMR (600 MHz,  $CDCl_3$ )  $\delta$  5.38 (brt,  $J$  = 6.6 Hz, 1H), 4.61 (s, 2H), 4.06 (d,  $J$  = 6.6 Hz, 2H), 3.36 (s, 3H), 2.68–2.70 (m, 1H), 2.23–2.18 (m, 1H), 2.15–2.10 (m, 1H), 1.69 (s, 3H), 1.66–1.62 (m, 2H), 1.28 (s, 3H), 1.24 (s, 3H);  $^{13}C$  NMR (150 MHz,  $CDCl_3$ )  $\delta$  139.8, 120.7, 95.5, 63.9, 63.5, 58.3, 55.1, 36.1, 27.1, 24.8, 18.7, 16.4.; HRMS (ESI)  $m/z$  calcd. for  $C_{12}H_{22}O_3Na$  ( $[M+Na]^+$ ) 237.1461, found 237.1470.

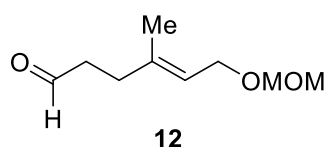

IR (neat)  $\nu_{max}$  = 3423, 2947, 2886, 1724, 1447, 1149, 1105, 1043, 921  $cm^{-1}$ ;  $^1H$  NMR (600 MHz,  $CDCl_3$ )  $\delta$  9.78 (t,  $J$  = 1.2 Hz, 1H), 5.38 (tq,  $J$  = 6.6, 1.2 Hz, 1H), 4.62 (s, 2H), 4.07 (d,  $J$  = 6.6 Hz, 2H), 3.37 (s, 3H), 2.58 (dt,  $J$  = 7.8, 1.2 Hz, 2H), 2.38 (t,  $J$  = 7.8 Hz, 2H), 1.70 (s, 3H);  $^{13}C$  NMR (150 MHz,  $CDCl_3$ )  $\delta$  201.9, 138.6, 121.2, 95.6, 63.4, 55.2, 41.7, 31.4, 16.5.; HRMS (ESI)  $m/z$  calcd. for  $C_9H_{16}O_3Na$  ( $[M+Na]^+$ ) 195.0992, found 195.0996.

### Ethyl (2E,6E)-8-(methoxymethoxy)-2,6-dimethylocta-2,6-dienoate (13)

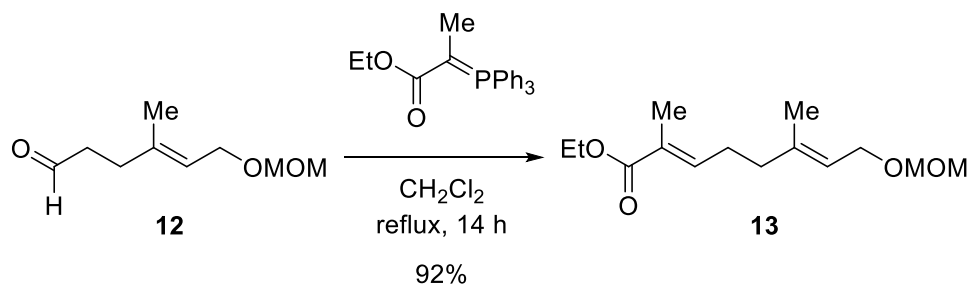

To a solution of aldehyde **12** (948 mg, 5.52 mmol) in  $CH_2Cl_2$  (18.4 mL) was added (Carbethoxyethylidene)triphenylphosphorane (4.00 g, 11.0 mmol) at room temperature. The resultant mixture was refluxed for 14 h. The reaction was cooled to room temperature and concentrated to give a residue. The residue was purified by flash column chromatography (Hexane/EtOAc = 9/1 to 4/1) to give ethyl ester **13** (1.30 g, 5.07 mmol, 92%) as a pale yellow oil.

IR (neat)  $\nu_{max}$  = 2982, 2931, 2884, 1710, 1270, 1148, 1046  $cm^{-1}$ ;  $^1H$  NMR (600 MHz,  $CDCl_3$ )  $\delta$  6.72 (tq,  $J$  = 7.8 Hz, 1H), 5.38 (brt,  $J$  = 7.2 Hz, 1H), 4.63 (s, 2H), 4.18 (q,  $J$  = 7.8 Hz, 2H), 4.08 (d,  $J$  = 7.2 Hz, 2H), 3.37 (s, 3H), 2.31 (dt,  $J$  = 7.8, 7.2 Hz, 2H), 2.16 (t,  $J$  = 7.2 Hz, 2H), 1.83 (s, 3H), 1.70 (s, 3H), 1.28 (t,  $J$  = 7.8 Hz, 3H);  $^{13}C$  NMR (150 MHz,  $CDCl_3$ )  $\delta$  168.2, 141.4, 139.9, 128.2, 121.0, 95.6, 63.6, 60.5, 55.3, 38.2, 27.0, 16.5, 14.4, 12.5; HRMS (ESI)  $m/z$  calcd. for  $C_{14}H_{24}O_4Na$  ( $[M+Na]^+$ ) 279.1567, found 279.1573.

### Ethyl (2*E*,6*E*)-8-hydroxy-2,6-dimethylocta-2,6-dienoate (**14**)

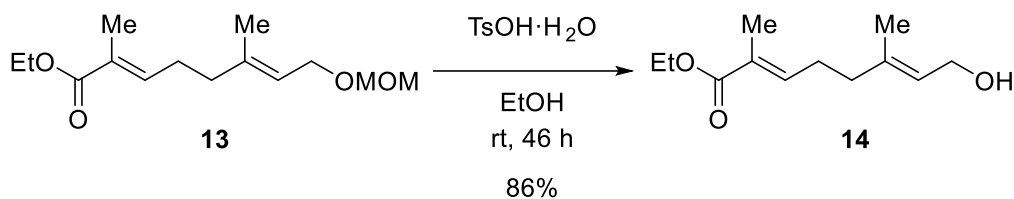

To a solution of aldehyde **13** (1.20 g, 4.68 mmol) in EtOH (25.0 mL) was added *p*-TsOH·H<sub>2</sub>O (1.81 g, 9.52 mmol) at 0 °C. The resultant mixture was stirred for 46 h at room temperature. The reaction was quenched by the addition of H<sub>2</sub>O and diluted with EtOAc. After the layers were separated, the aqueous layer was extracted with EtOAc. The combined organic solution was washed with brine, dried over Na<sub>2</sub>SO<sub>4</sub>, filtered, and concentrated to give a residue. The residue was purified by flash column chromatography (Hexane/EtOAc = 4/1 to 2/1) to give alcohol **14** (851 mg, 4.01 mmol, 86%) as a colorless oil.

IR (neat)  $\nu_{\max}$  = 3422, 2981, 2931, 1709, 1446, 1368, 1272, 1024 cm<sup>-1</sup>; <sup>1</sup>H NMR (600 MHz, CDCl<sub>3</sub>)  $\delta$  6.72 (tq, *J* = 7.2, 1.2 Hz, 1H), 5.43 (m, 1H), 4.18 (q, *J* = 7.8 Hz, 2H), 4.15 (d, *J* = 7.2 Hz, 2H), 2.30 (dt, *J* = 7.8, 7.2 Hz, 2H), 2.14 (t, *J* = 7.8 Hz, 2H), 1.83 (d, *J* = 1.2 Hz, 3H), 1.69 (s, 3H), 1.52–1.32 (brs, 1H), 1.28 (t, *J* = 7.8 Hz, 3H); <sup>13</sup>C NMR (150 MHz, CDCl<sub>3</sub>)  $\delta$  168.2, 141.3, 138.5, 128.1, 124.1, 60.4, 59.3, 38.0, 26.9, 16.2, 14.3, 12.4; HRMS (ESI) *m/z* calcd. for C<sub>12</sub>H<sub>20</sub>O<sub>3</sub>Na ([M+Na]<sup>+</sup>) 235.1305, found 235.1312.

### Ethyl (2*E*,6*E*)-2,6-dimethyl-8-(4,4,5,5-tetramethyl-1,3,2-dioxaborolan-2-yl)octa-2,6-dienoate (**2**)

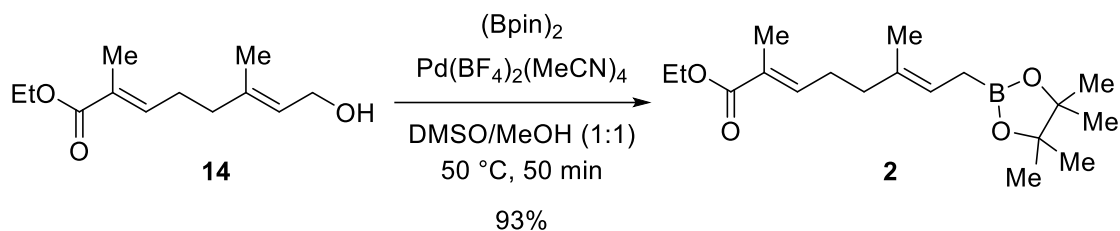

A mixture of alcohol **14** (100 mg, 471  $\mu$ mol) and bis(pinacolato)diboron [(Bpin)<sub>2</sub>, 180 mg, 710  $\mu$ mol] in DMSO (2.5 mL) and MeOH (2.5 mL) was degassed with sonication under an argon atmosphere. To the resultant mixture was added tetrakis(acetonitrile)palladium (II) tetrafluoroborate [Pd(BF<sub>4</sub>)<sub>2</sub>(MeCN)<sub>4</sub>], (20.9 mg, 47.1  $\mu$ mol) at room temperature. The resultant mixture was stirred for 50 min at 50 °C. The reaction was cooled to room temperature, and then concentrated to give a residue. The residue was purified by flash column chromatography (Hexane/EtOAc = 19/1 to 9/1) to give **2** (142 mg, 441  $\mu$ mol, 93%) as a colorless oil.

IR (neat)  $\nu_{\max}$  = 2979, 2931, 1711, 1370, 1343, 1326, 1273, 1124 cm<sup>-1</sup>; <sup>1</sup>H NMR (600 MHz, CDCl<sub>3</sub>)  $\delta$  6.73 (tq, *J* = 7.8, 1.2 Hz, 1H), 5.28 (tq, *J* = 7.8, 1.2 Hz, 1H), 4.17 (q, *J* = 7.2 Hz, 2H), 2.26 (dt, *J* = 7.8, 7.2 Hz, 2H), 2.10 (t, *J* = 7.2 Hz, 2H), 1.82 (d, *J* = 1.2 Hz, 3H), 1.60 (s, 3H), 1.29 (d, *J* = 7.8 Hz, 2H), 1.27 (t, *J* = 7.2 Hz, 3H), 1.24 (s, 12H); <sup>13</sup>C NMR (150 MHz, CDCl<sub>3</sub>)  $\delta$  168.3, 142.1, 134.1, 127.6, 119.3, 83.1 (2C), 60.3, 38.3, 27.6, 25.0, 24.7 (4C), 15.9, 14.3, 12.4; HRMS (ESI) *m/z* calcd. for C<sub>18</sub>H<sub>31</sub>O<sub>4</sub>Na ([M+Na]<sup>+</sup>) 345.2208, found 345.2212.

**Ethyl (2*E*,6*E*)-8-[6-methoxy-4-(methoxymethoxy)-1-oxo-1,3-dihydroisobenzofuran-5-yl]-2,6-dimethylocta-2,6-dienoate (15) and Ethyl (2*E*,6*Z*)-8-[6-methoxy-4-(methoxymethoxy)-1-oxo-1,3-dihydroisobenzofuran-5-yl]-2,6-dimethylocta-2,6-dienoate (16)**

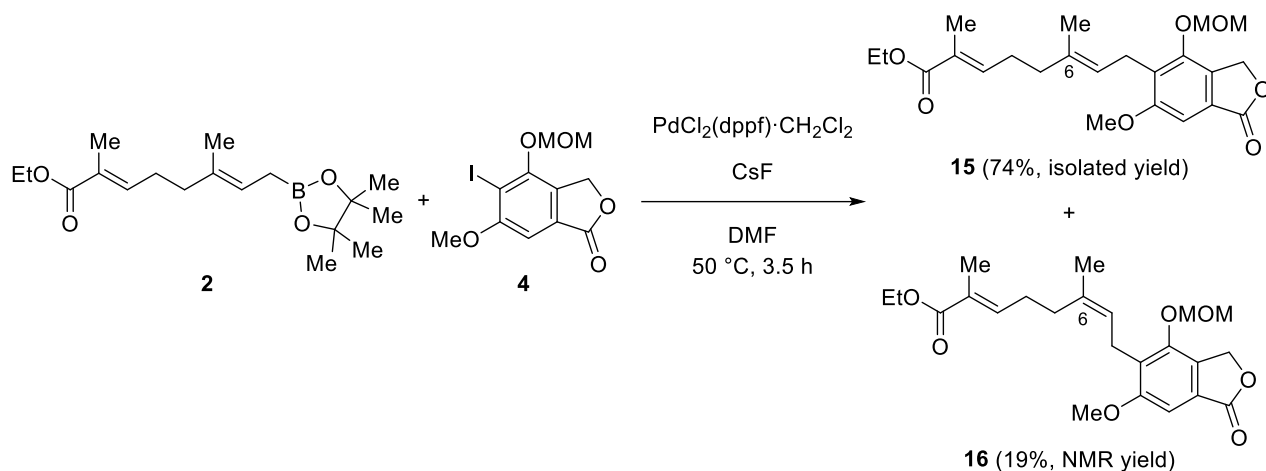

A solution of **4** (27.6 mg, 85.7  $\mu\text{mol}$ ) and **2** (20.0 mg, 57.2  $\mu\text{mol}$ ) in DMF (1.1 mL) was degassed with sonication under an argon atmosphere. To the resultant mixture was added [1,1'-bis(diphenylphosphino)ferrocene]dichloropalladium (II) ( $\text{PdCl}_2(\text{dppf}) \cdot \text{CH}_2\text{Cl}_2$ , 9.3 mg, 11  $\mu\text{mol}$ ) and CsF (12.1 mg, 79.7  $\mu\text{mol}$ ) at room temperature. The reaction mixture was stirred for 3.5 h at 50  $^\circ\text{C}$ . The reaction was cooled to room temperature, and then quenched by the addition of water and EtOAc. After the layers were separated, the aqueous layer was extracted with EtOAc. The combined organic solution was washed with brine, dried over  $\text{Na}_2\text{SO}_4$ , filtered, and concentrated to give a residue. The residue was purified by flash column chromatography (Hexane/EtOAc = 8/1 to 2/1) to give a mixture of **15** and **16**. (The yield of **16** was determined based on  $^1\text{H}$  NMR spectrum to be 19%.) The resulting mixture was further purified by using preparative HPLC [CHIRALART Cellulose-SB (20  $\times$  250 mm), hexane/2-propanol = 9/1, 25.0 mL/min, 254 nm, RT,  $t_R$  = 5.3 min for **15** and 7.1 min for **16**] to give (2*E*/6*E*)-**15** (15.4 mg, 36.8  $\mu\text{mol}$ , 74%) as a colorless oil.

**15**: IR (neat)  $\nu_{\text{max}}$  = 2979, 2932, 2846, 1767, 1707, 1468, 1331, 1270, 1154, 1113, 1070  $\text{cm}^{-1}$ ;  $^1\text{H}$  NMR (600 MHz,  $\text{CDCl}_3$ )  $\delta$  7.13 (s, 1H), 6.67 (tq,  $J$  = 7.2, 1.2 Hz, 1H), 5.37 (s, 2H), 5.14 (tq,  $J$  = 7.8, 1.2 Hz, 1H), 5.06 (s, 2H), 4.14 (q,  $J$  = 6.6 Hz, 2H), 3.88 (s, 3H), 3.52 (s, 3H), 3.44 (d,  $J$  = 7.8 Hz, 2H), 2.25 (dt,  $J$  = 7.8, 7.2 Hz, 2H), 2.08 (t,  $J$  = 7.8 Hz, 2H), 1.78 (s, 6H), 1.25 (t,  $J$  = 6.6 Hz, 3H);  $^{13}\text{C}$  NMR (150 MHz,  $\text{CDCl}_3$ )  $\delta$  171.3, 168.1, 159.5, 150.2, 141.6, 134.9, 128.9, 128.7, 127.8, 125.4, 122.0, 101.6, 97.0, 69.1, 60.4, 56.7, 56.1, 38.2, 27.2, 23.5, 16.1, 14.2, 12.3; HRMS (ESI)  $m/z$  calcd. for  $\text{C}_{23}\text{H}_{30}\text{O}_7\text{Na}$  ( $[\text{M}+\text{Na}]^+$ ) 441.1884, found 441.1895.

**16**: IR (neat)  $\nu_{\text{max}}$  = 2925, 2852, 1770, 1747, 1715, 1457, 1333, 1262, 1155, 1112, 1072  $\text{cm}^{-1}$ ;  $^1\text{H}$  NMR (600 MHz,  $\text{CDCl}_3$ )  $\delta$  7.14 (s, 1H), 6.83–6.80 (m, 1H), 5.37 (s, 2H), 5.18 (t,  $J$  = 6.6 Hz, 1H), 5.07 (s, 2H), 4.20 (q,  $J$  = 7.2 Hz, 2H), 3.88 (s, 3H), 3.52 (s, 3H), 3.45 (d,  $J$  = 6.6 Hz, 2H), 2.36–2.30 (m, 4H), 1.87 (s, 3H), 1.69 (s, 3H), 1.30 (t,  $J$  = 7.2 Hz, 3H);  $^{13}\text{C}$  NMR (150 MHz,  $\text{CDCl}_3$ )  $\delta$  171.3, 168.2, 159.4, 150.1, 141.7, 135.2, 128.7, 128.5, 128.0, 125.4, 122.7, 101.7, 96.9, 69.1, 60.5, 56.8, 56.1, 30.7, 29.7, 27.2, 23.3, 14.3, 12.3; HRMS (ESI)  $m/z$  calcd. for  $\text{C}_{23}\text{H}_{31}\text{O}_7$  ( $[\text{M}+\text{H}]^+$ ) 419.2064, found 419.2054.



### 6-Methoxy-4-(methoxymethoxy)isobenzofuran-1(3H)-one (**17**) (Table 1, entry 3)

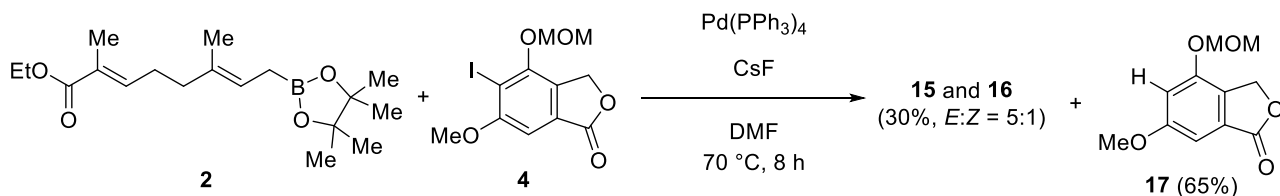

A solution of **4** (4.0 mg, 11  $\mu$ mol) and **2** (5.5 mg, 17  $\mu$ mol) in DMF (460  $\mu$ L) was degassed with sonication under an argon atmosphere. To the resultant mixture was added tetrakis(triphenylphosphine)palladium(0) [Pd(PPh<sub>3</sub>)<sub>4</sub>, 2.0 mg, 1.7  $\mu$ mol] and CsF (2.6 mg, 17.1  $\mu$ mol) at room temperature. The reaction mixture was stirred for 8 h at 70 °C. The reaction was cooled to room temperature, and then quenched by the addition of water and EtOAc. After the layers were separated, the aqueous layer was extracted with EtOAc. The combined organic solution was washed with brine, dried over Na<sub>2</sub>SO<sub>4</sub>, filtered, and concentrated to give a residue. The residue was purified by flash column chromatography (Hexane/EtOAc = 8/1 to 2/1 and Cyclohexane/EtOAc = 8/1 to 2/1) to give a mixture of **15** and **16** (1.4 mg, 3.4  $\mu$ mol, 30%, *E:Z* = 5:1) and **17** (1.7 mg, 7.6  $\mu$ mol, 65%).

IR (neat)  $\nu_{\max}$  = 2918, 2849, 1762, 1505, 1457, 1338, 1151, 1073, 993 cm<sup>-1</sup>; <sup>1</sup>H NMR (600 MHz, CDCl<sub>3</sub>)  $\delta$  7.01 (d, *J* = 1.2 Hz, 1H), 6.95 (d, *J* = 1.2 Hz, 1H), 5.24 (s, 2H), 5.22 (s, 2H), 3.85; <sup>13</sup>C NMR (150 MHz, CDCl<sub>3</sub>)  $\delta$  171.1, 162.3, 152.4, 128.4, 128.3, 108.1, 100.4, 94.6, 68.1, 56.4, 56.0; HRMS (ESI) *m/z* calcd. for C<sub>11</sub>H<sub>13</sub>O<sub>5</sub> ([M+H]<sup>+</sup>) 225.0757, found 225.0757.

### Corallocin A (**1**)

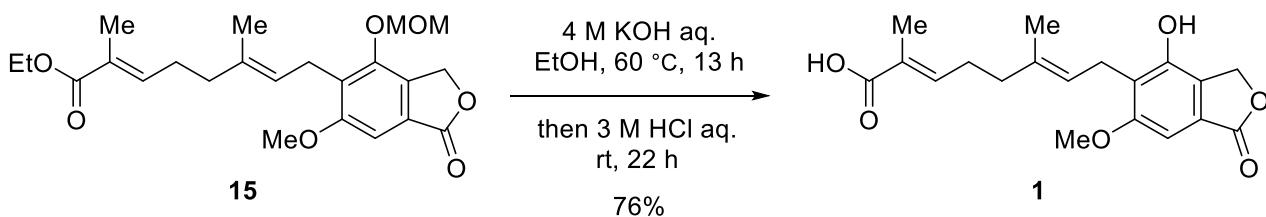

To a solution of **15** (4.0 mg, 9.6  $\mu$ mol) in EtOH (200  $\mu$ L) was added 4 M KOH aq. (25.0  $\mu$ L, 100  $\mu$ mol) at room temperature. The reaction mixture was stirred for 13 h at 60 °C. After the reaction mixture was cooled to room temperature, 3 M HCl aq. (200  $\mu$ L, 600  $\mu$ mol) was added and stirred for further 22 h. The reaction mixture was quenched by the addition of sat. NH<sub>4</sub>Cl aq. and diluted with CH<sub>2</sub>Cl<sub>2</sub>. After the layers were separated, the aqueous layer was extracted with CH<sub>2</sub>Cl<sub>2</sub>. The combined organic solution was washed with brine, dried over Na<sub>2</sub>SO<sub>4</sub>, filtered, and concentrated to give a residue. The residue was purified by flash column chromatography (Hexane/EtOAc = 2/1 to 1/2) to give **1** (2.5 mg, 7.2  $\mu$ mol, 76%) as a white solid.

Mp = 151.1–152.5 °C; IR (KBr)  $\nu_{\max}$  = 3243, 2927, 2851, 1732, 1684, 1472, 1349, 1100 cm<sup>-1</sup>; <sup>1</sup>H NMR (600 MHz, acetone-*d*<sub>6</sub>)  $\delta$  6.89 (s, 1H), 6.69 (tq, *J* = 7.2, 1.2 Hz, 1H), 5.24 (m, 1H), 5.23 (s, 2H), 3.90 (s, 3H), 3.46 (d, *J* = 7.2 Hz, 2H), 2.28 (dt, *J* = 7.8, 7.2 Hz, 2H), 2.09 (t, *J* = 7.8 Hz, 2H), 1.80 (brs, 3H), 1.75 (brs, 3H); <sup>13</sup>C NMR (150 MHz, acetone-*d*<sub>6</sub>)  $\delta$  171.5, 169.3, 160.5, 150.4, 142.2, 135.0, 128.6, 127.7, 125.4, 124.0, 123.4, 98.5, 68.6, 56.4, 38.9, 27.6, 23.3, 16.1, 12.5; HRMS (ESI) *m/z* calcd. for C<sub>19</sub>H<sub>22</sub>O<sub>6</sub>Na ([M+Na]<sup>+</sup>) 369.1309, found 369.1313.

**Table S1. NMR spectroscopic data (acetone-*d*<sub>6</sub>) for natural and synthetic corallocin A (1).<sup>(S4)</sup>**

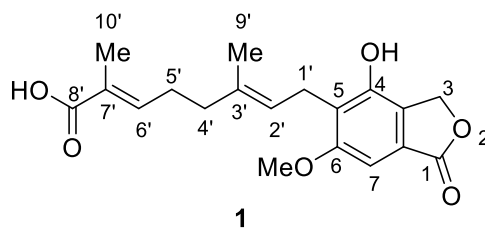

| position | Natural corallocin A (1) |                      | Synthetic corallocin A (1) |                      |
|----------|--------------------------|----------------------|----------------------------|----------------------|
|          | $\delta_C$               | $\delta_H$ (J in Hz) | $\delta_C$                 | $\delta_H$ (J in Hz) |
| 1        | 171.7                    |                      | 171.5                      |                      |
| 2        |                          |                      |                            |                      |
| 3        | 68.7                     | 5.25, s              | 68.6                       | 5.23, s              |
| 3a       | 125.6                    |                      | 125.4                      |                      |
| 4        | 150.5                    |                      | 150.4                      |                      |
| 5        | 124.1                    |                      | 124.0                      |                      |
| 6        | 160.7                    |                      | 160.5                      |                      |
| 7        | 98.7                     | 6.89, s              | 98.5                       | 6.89, s              |
| 7a       | 127.7                    |                      | 127.7                      |                      |
| OMe      | 56.5                     | 3.91, s              | 56.4                       | 3.90, s              |
| 1'       | 23.5                     | 3.47 (d, 7.2)        | 23.3                       | 3.46 (d, 7.2)        |
| 2'       | 123.5                    | 5.26, m              | 123.4                      | 5.24, m              |
| 3'       | 135.2                    |                      | 135.0                      |                      |
| 4'       | 39.0                     | 2.1, (t, 7.4)        | 38.9                       | 2.09 (t, 7.8)        |
| 5'       | 27.8                     | 2.28, m              | 27.6                       | 2.28, m              |
| 6'       | 142.6                    | 6.71 (tq, 7.4, 1.4)  | 142.2                      | 6.69 (tq, 7.2, 1.2)  |
| 7'       | 128.4                    |                      | 128.6                      |                      |
| 8'       | 169.1                    |                      | 169.3                      |                      |
| 9'       | 16.2                     | 1.81 (d, 1.2)        | 16.1                       | 1.80, brs            |
| 10'      | 12.5                     | 1.75, m              | 12.5                       | 1.75, brs            |

### 3. $^1\text{H}$ and $^{13}\text{C}$ NMR charts

Figure S1.  $^1\text{H}$  NMR spectrum (600 MHz,  $\text{CDCl}_3$ ) of compound 6.

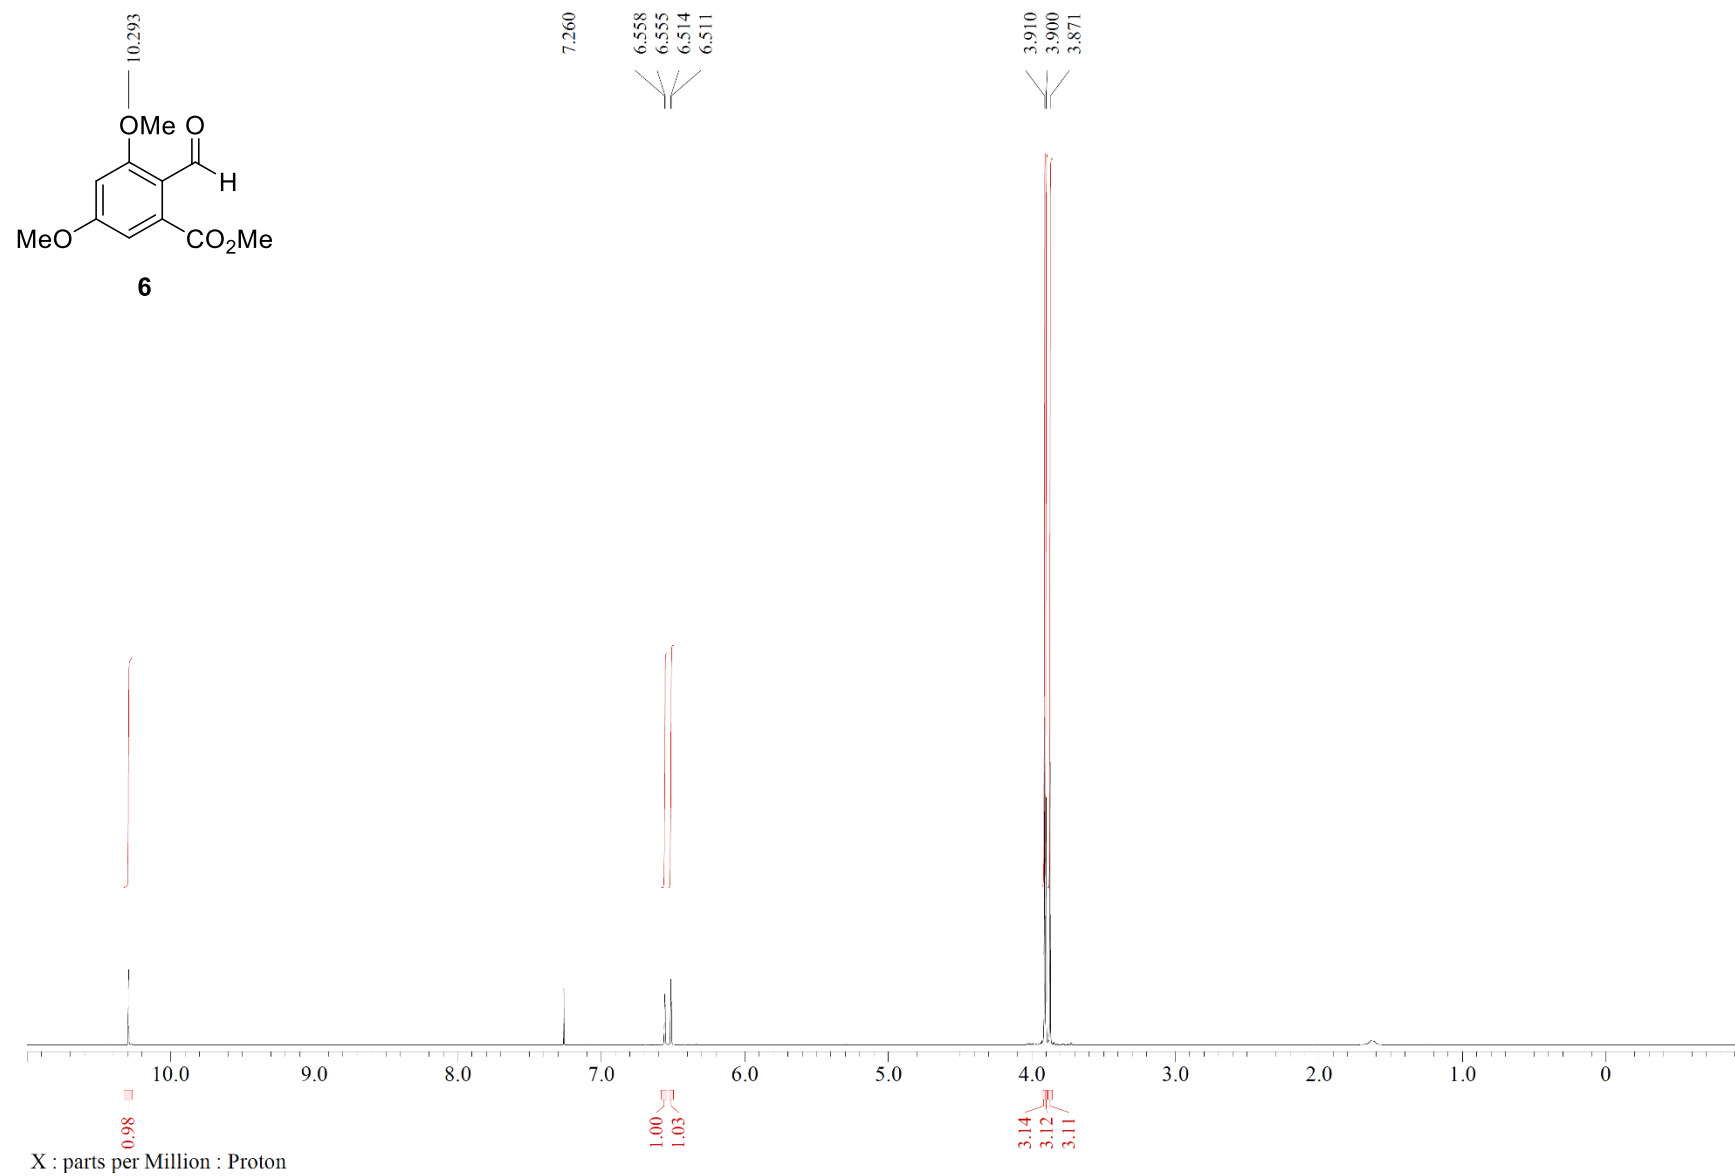

Figure S2.  $^{13}\text{C}$  NMR spectrum (150 MHz,  $\text{CDCl}_3$ ) of compound 6.

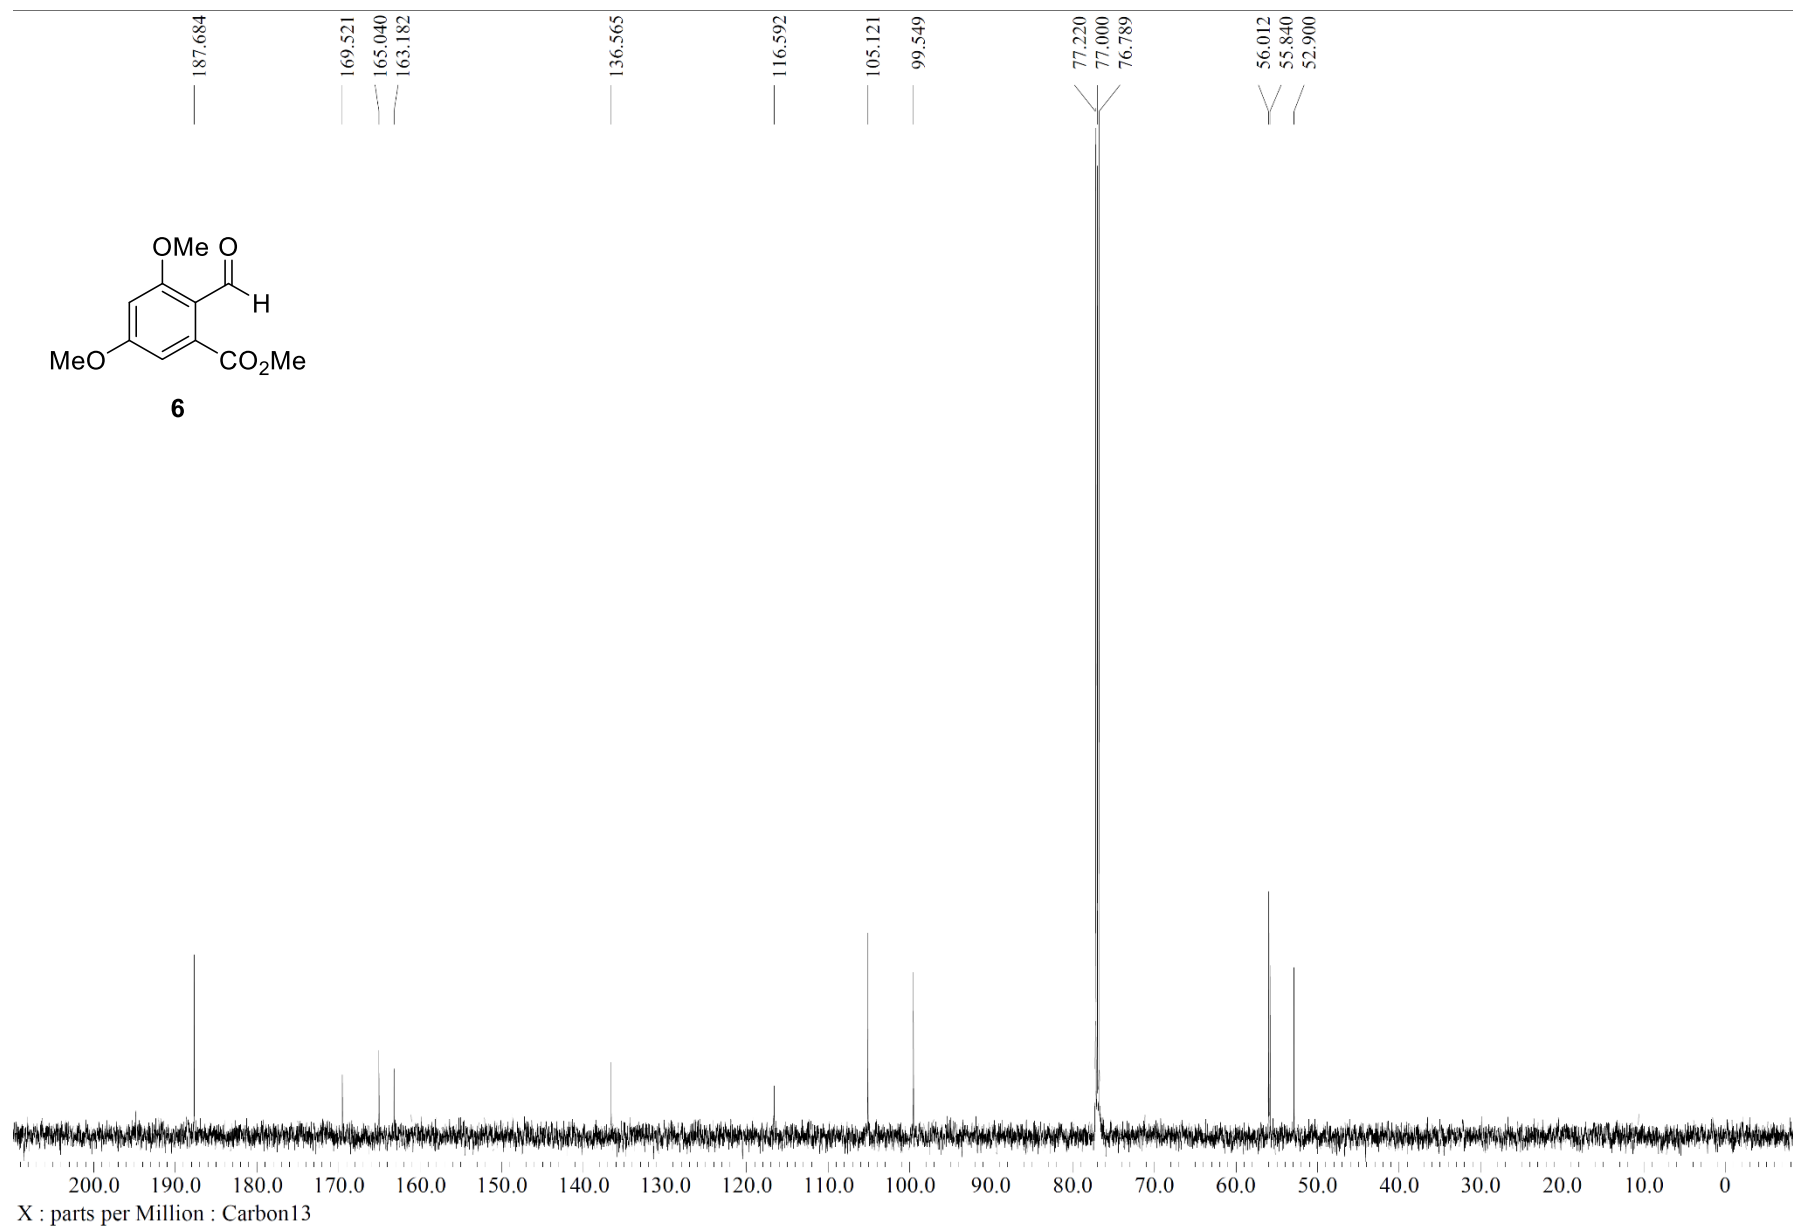

Figure S3.  $^1\text{H}$  NMR spectrum (600 MHz,  $\text{CDCl}_3$ ) of compound 7.

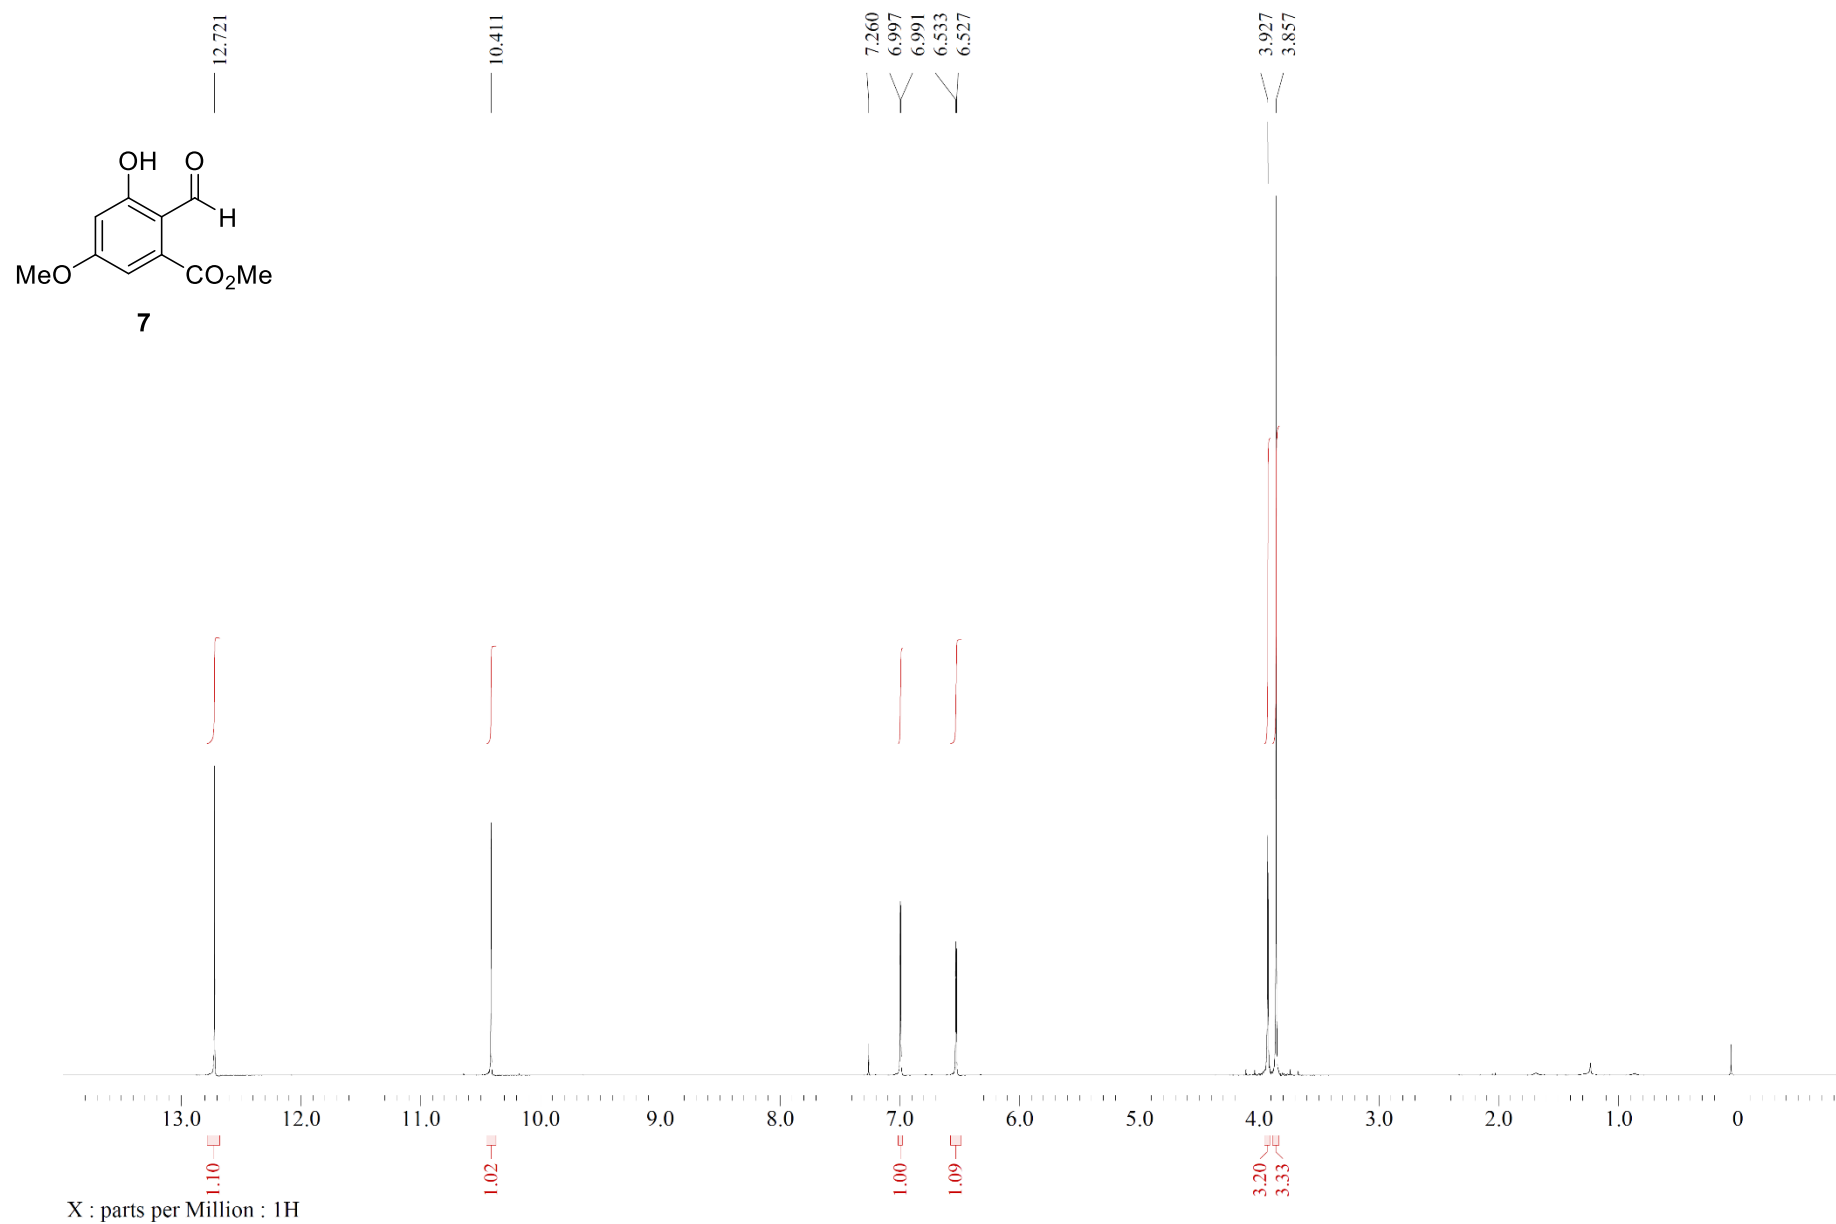

Figure S4.  $^{13}\text{C}$  NMR spectrum (150 MHz,  $\text{CDCl}_3$ ) of compound 7.

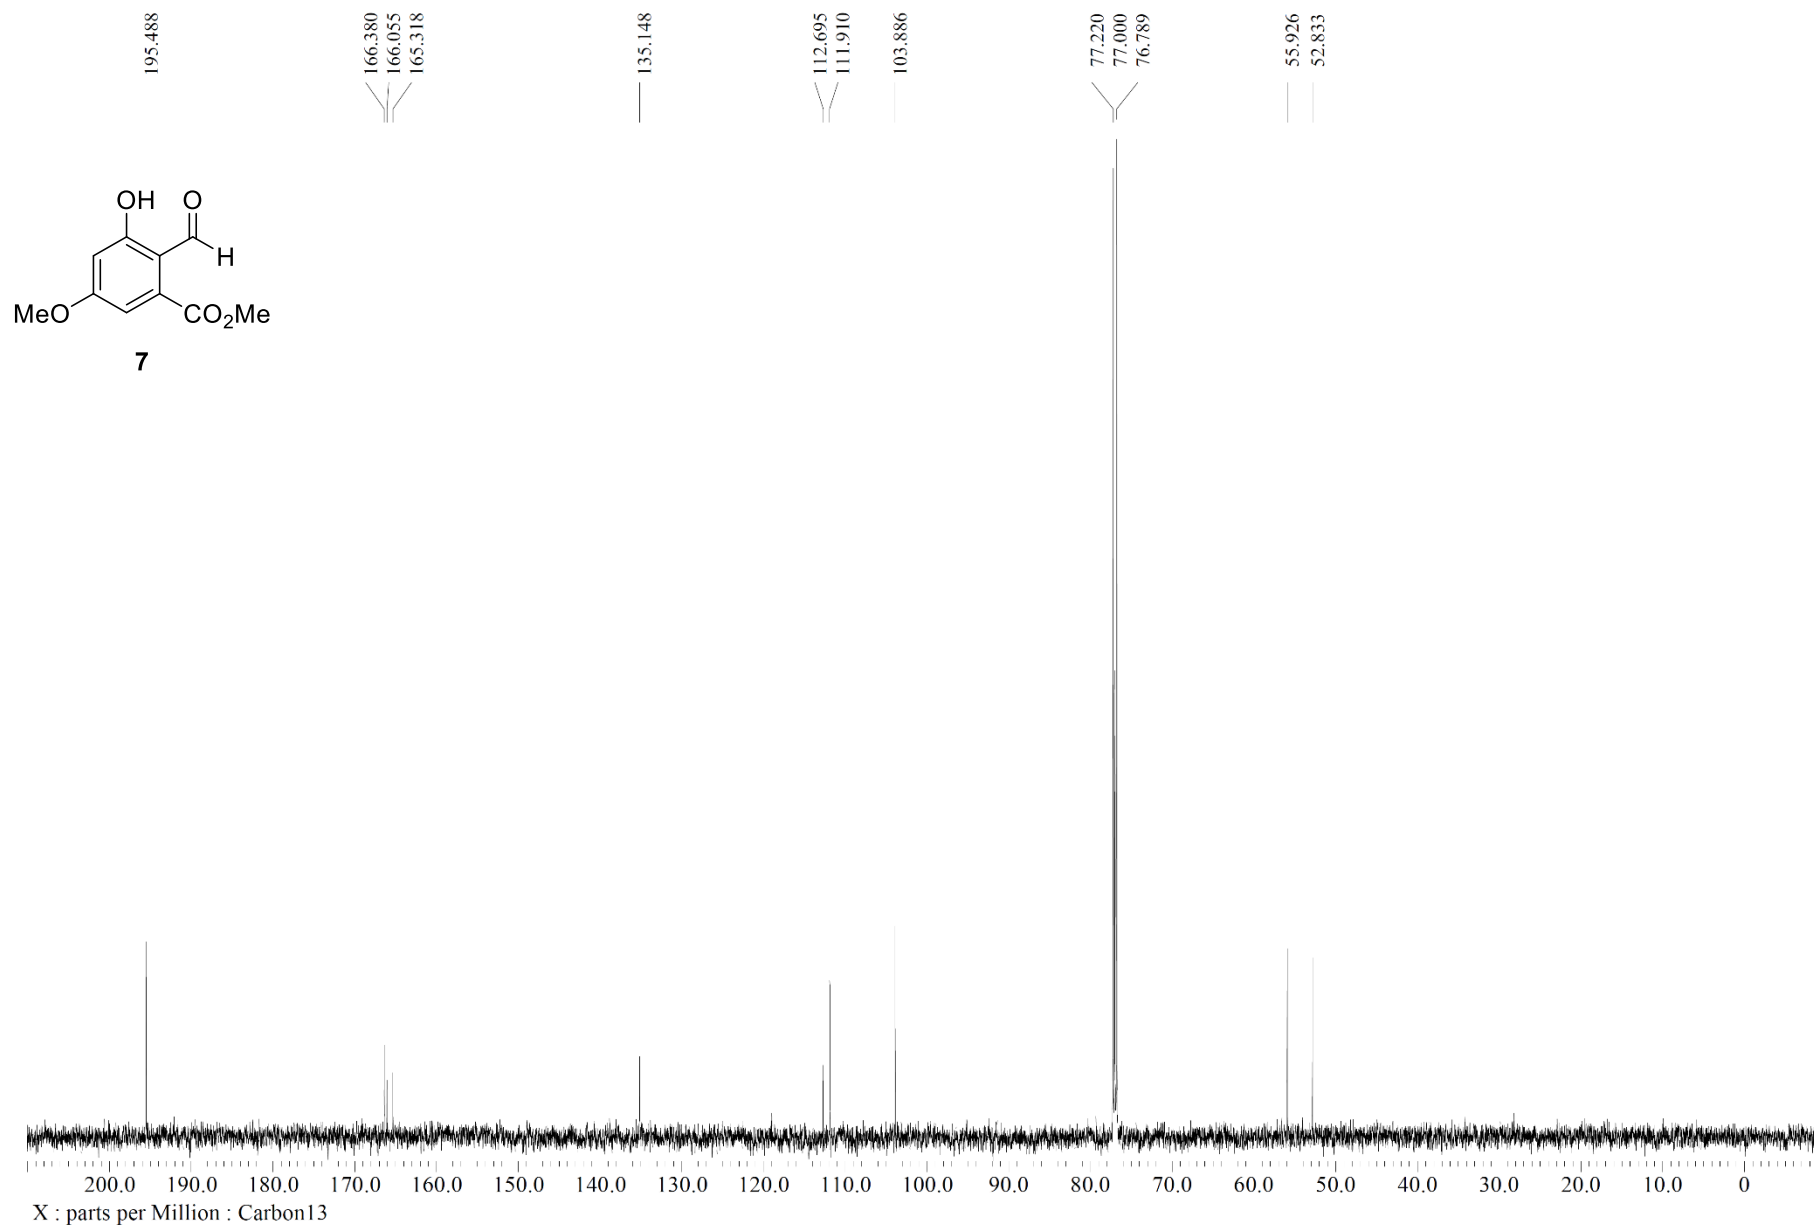

Figure S5. <sup>1</sup>H NMR spectrum (600 MHz, CDCl<sub>3</sub>) of compound 8.

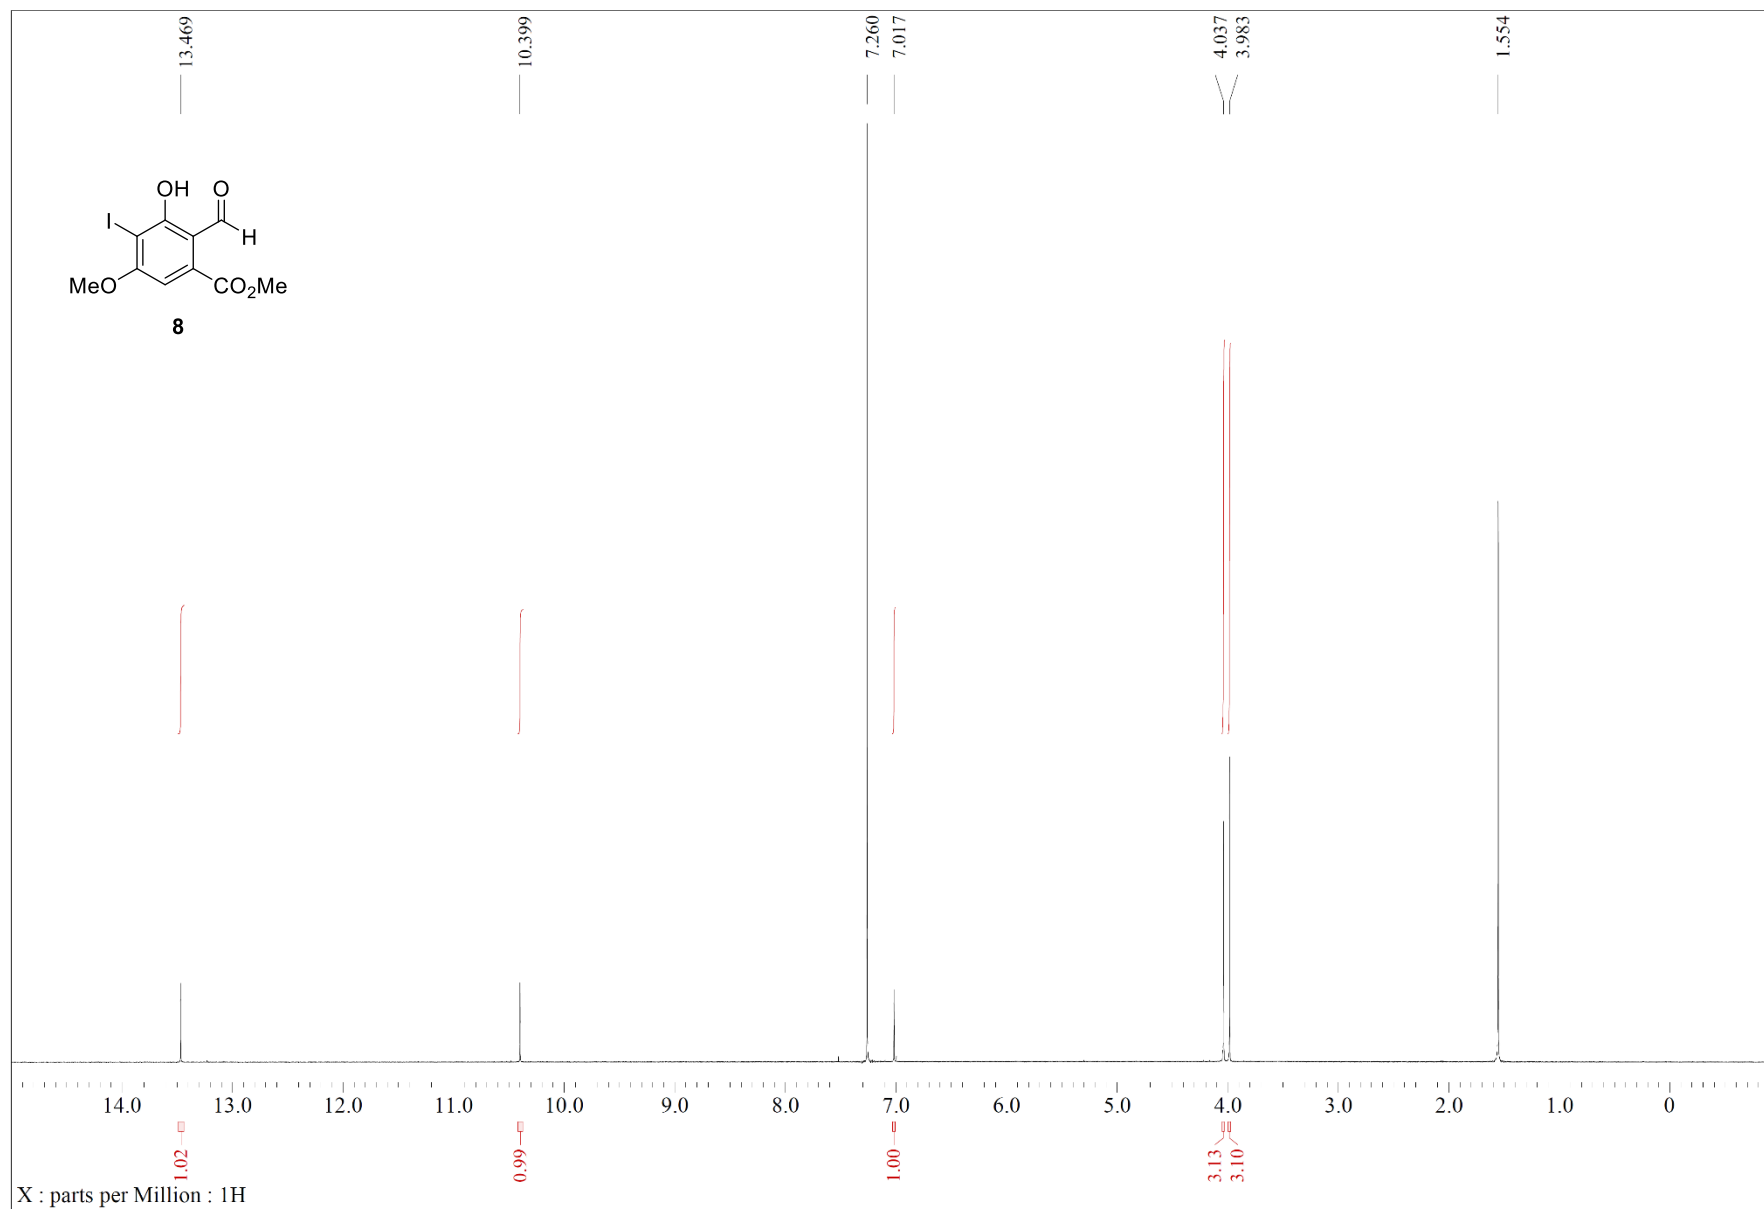

Figure S6.  $^{13}\text{C}$  NMR spectrum (150 MHz,  $\text{CDCl}_3$ ) of compound 8.

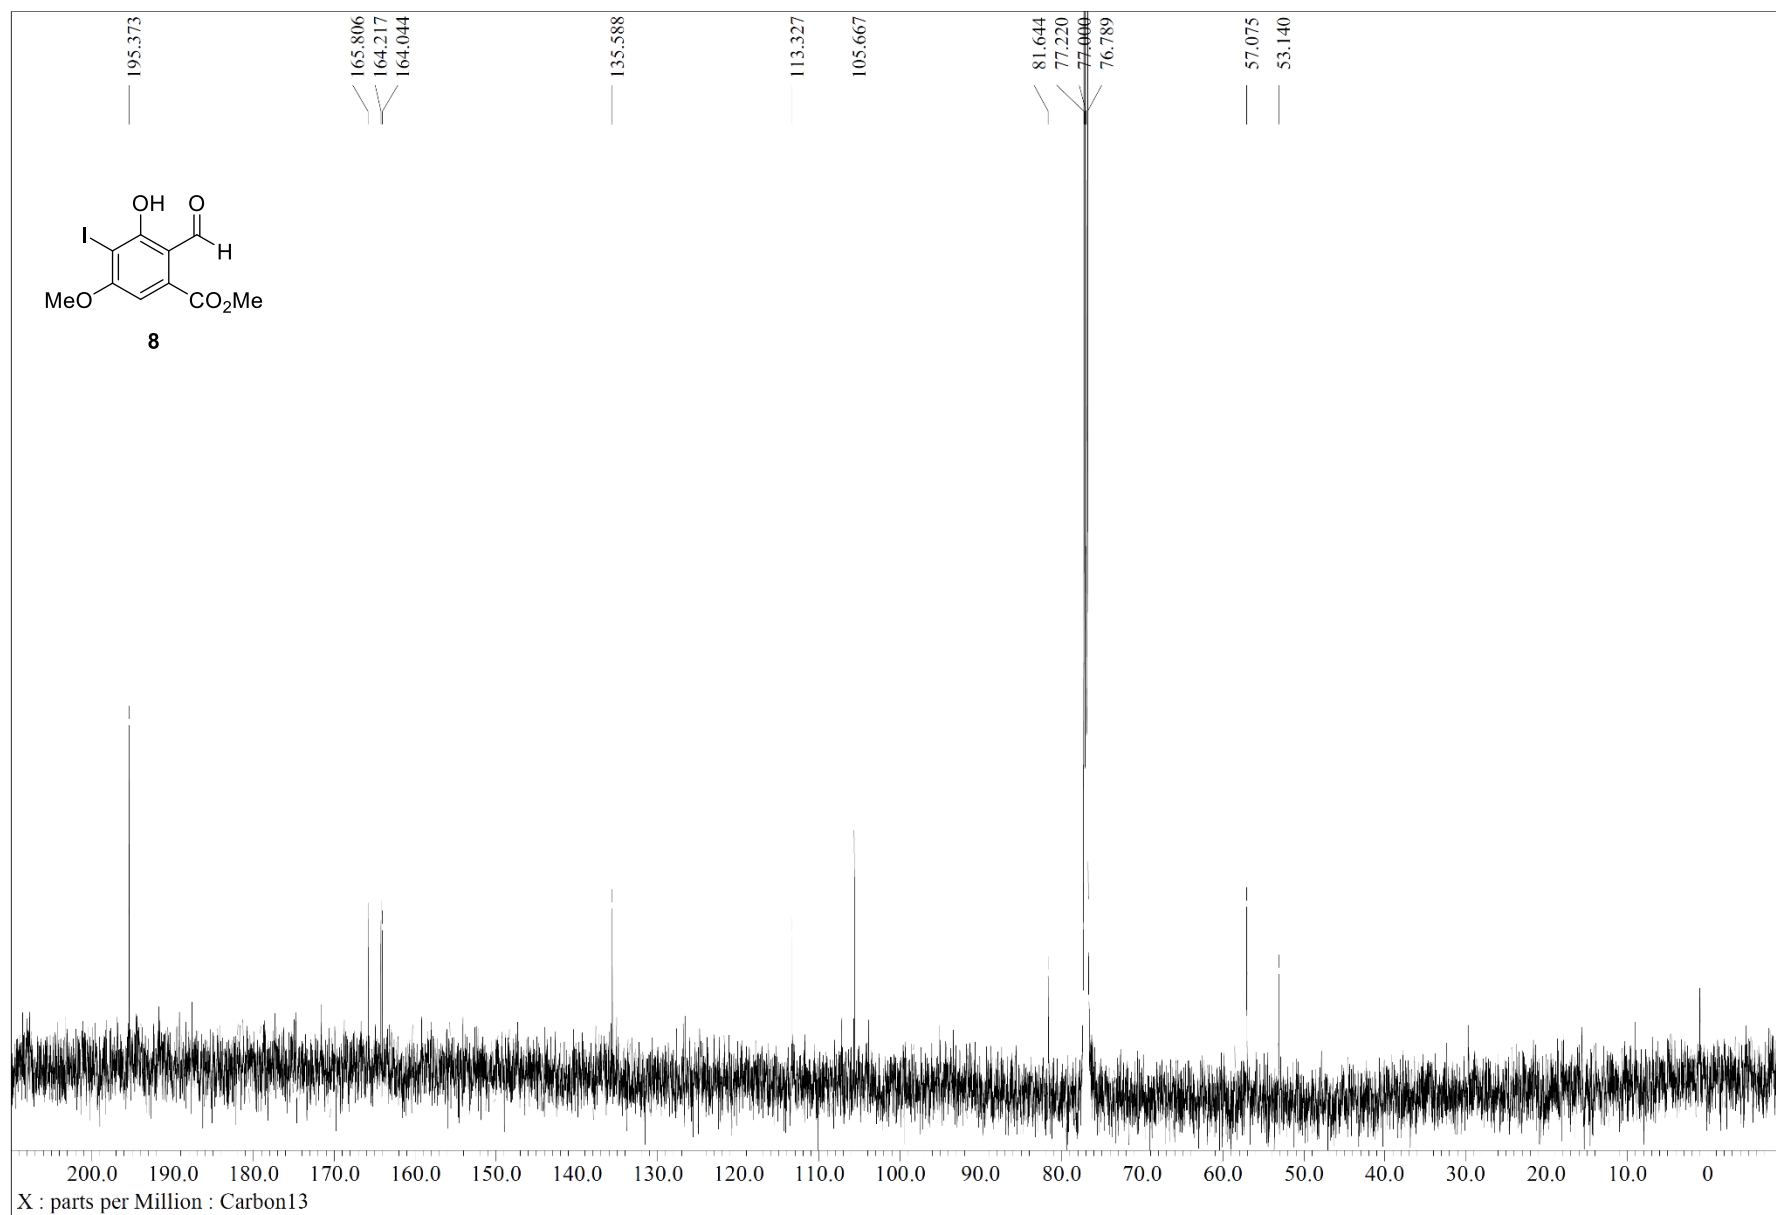



Figure S7. <sup>1</sup>H NMR spectrum (600 MHz, CDCl<sub>3</sub>) of compound 9.

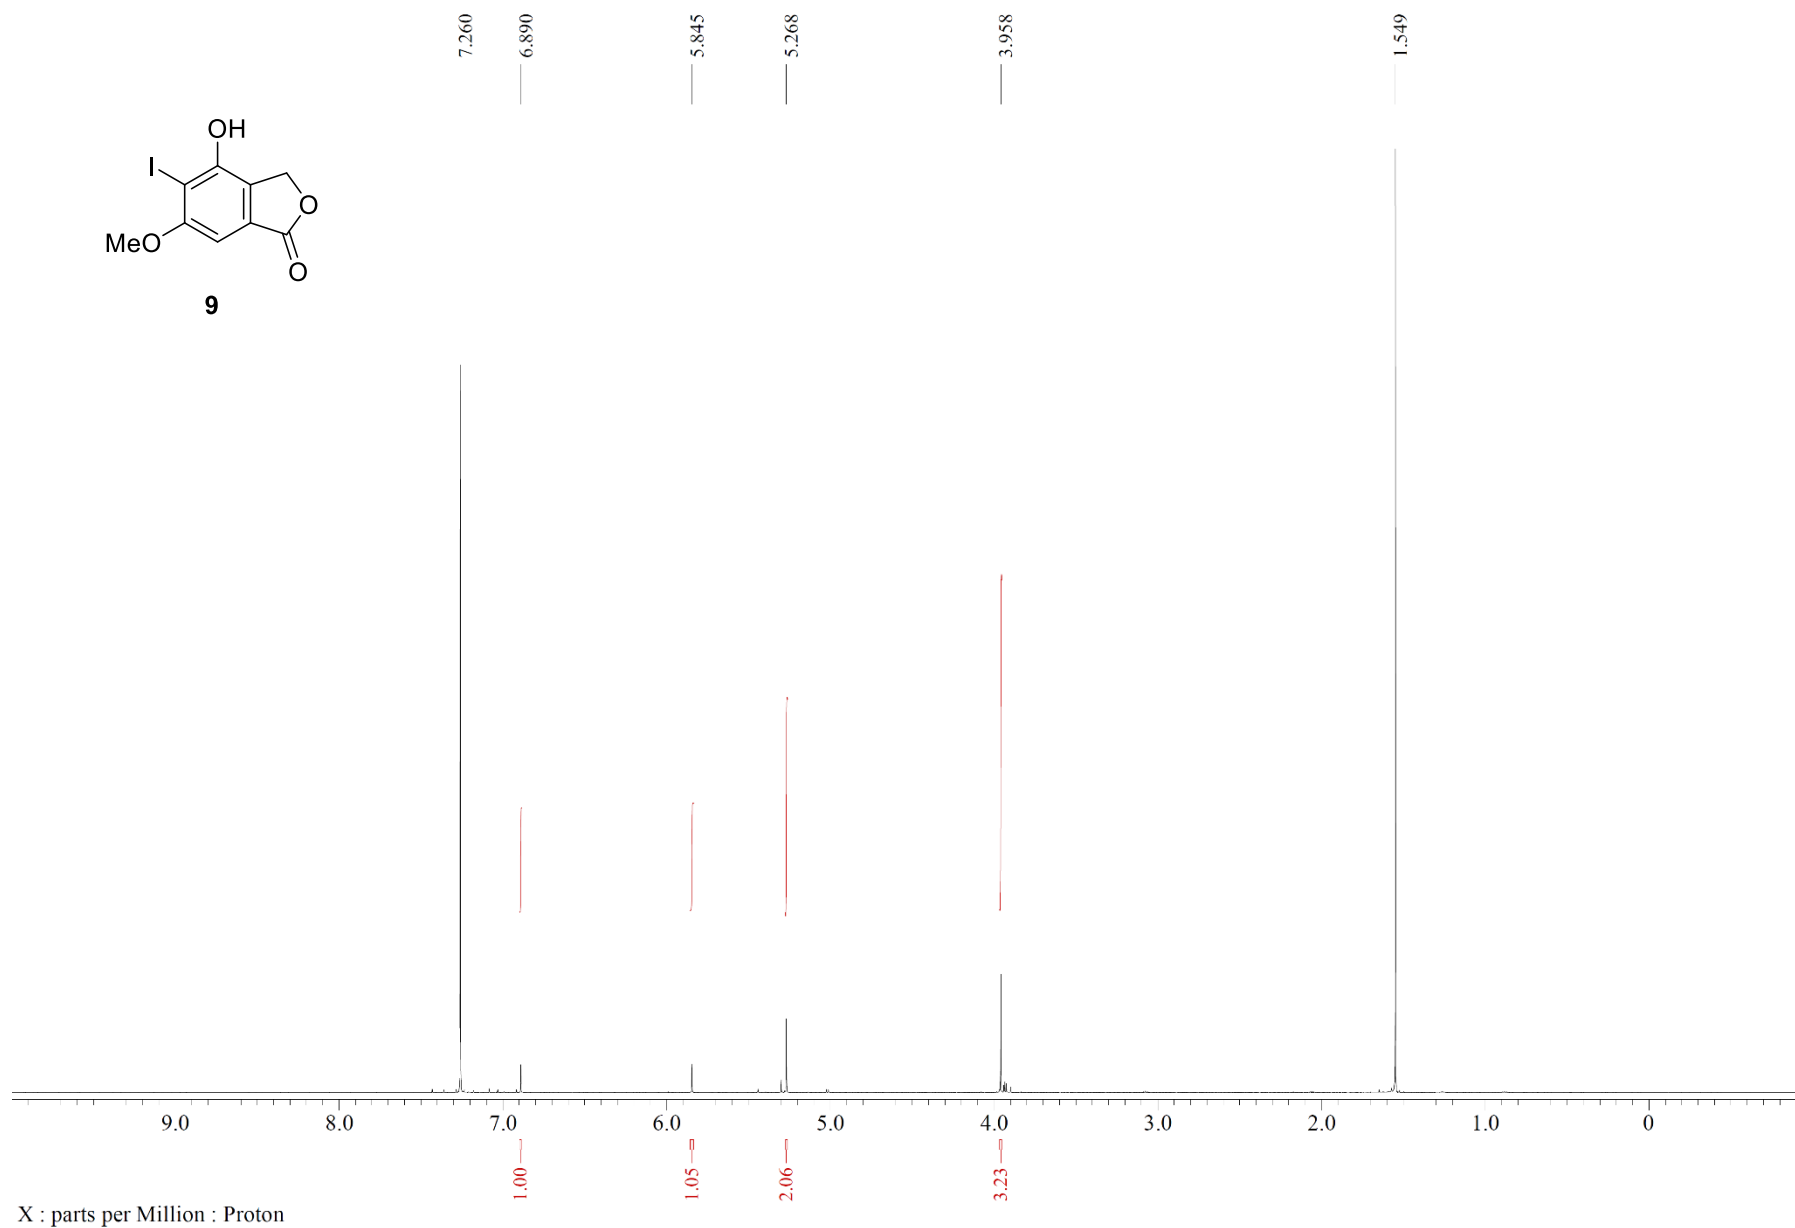

Figure S8.  $^{13}\text{C}$  NMR spectrum (150 MHz,  $\text{CDCl}_3$ ) of compound 9.

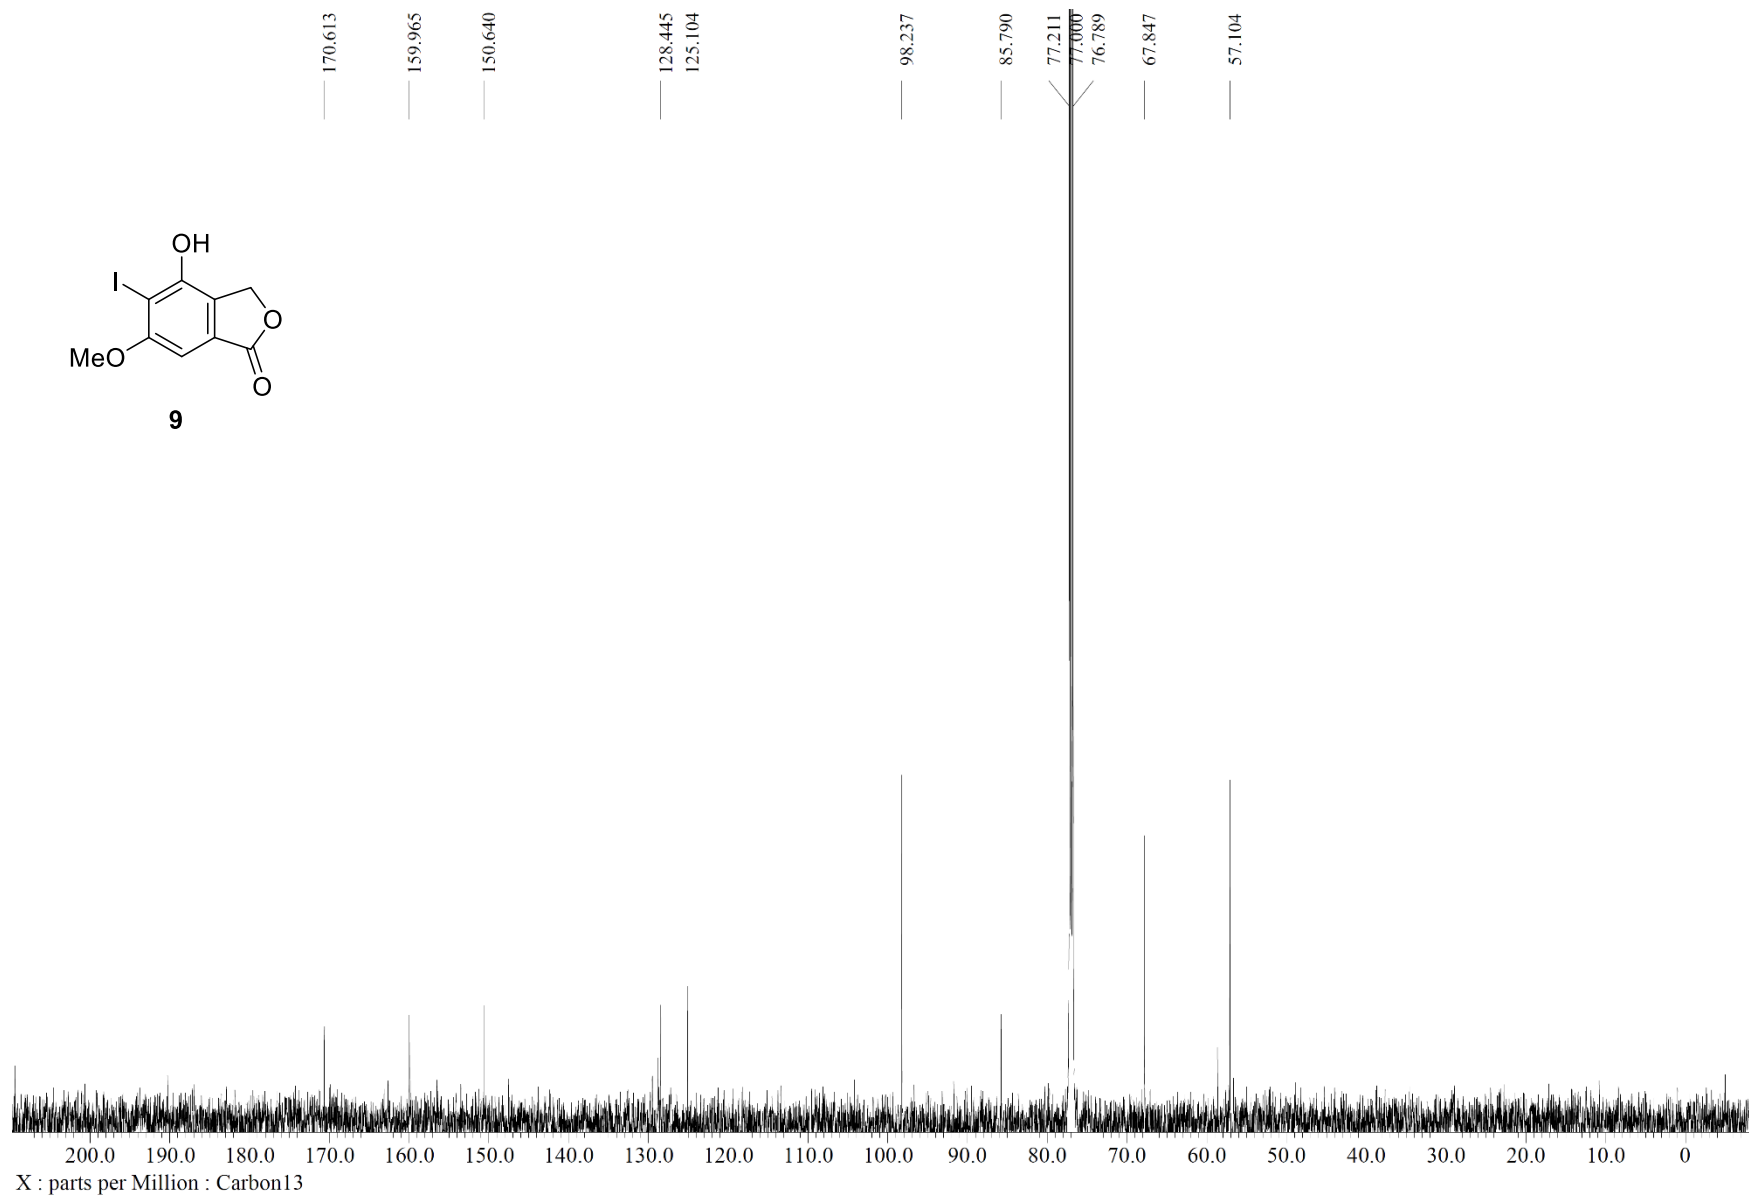

Figure S9. <sup>1</sup>H NMR spectrum (600 MHz, CDCl<sub>3</sub>) of compound 4.

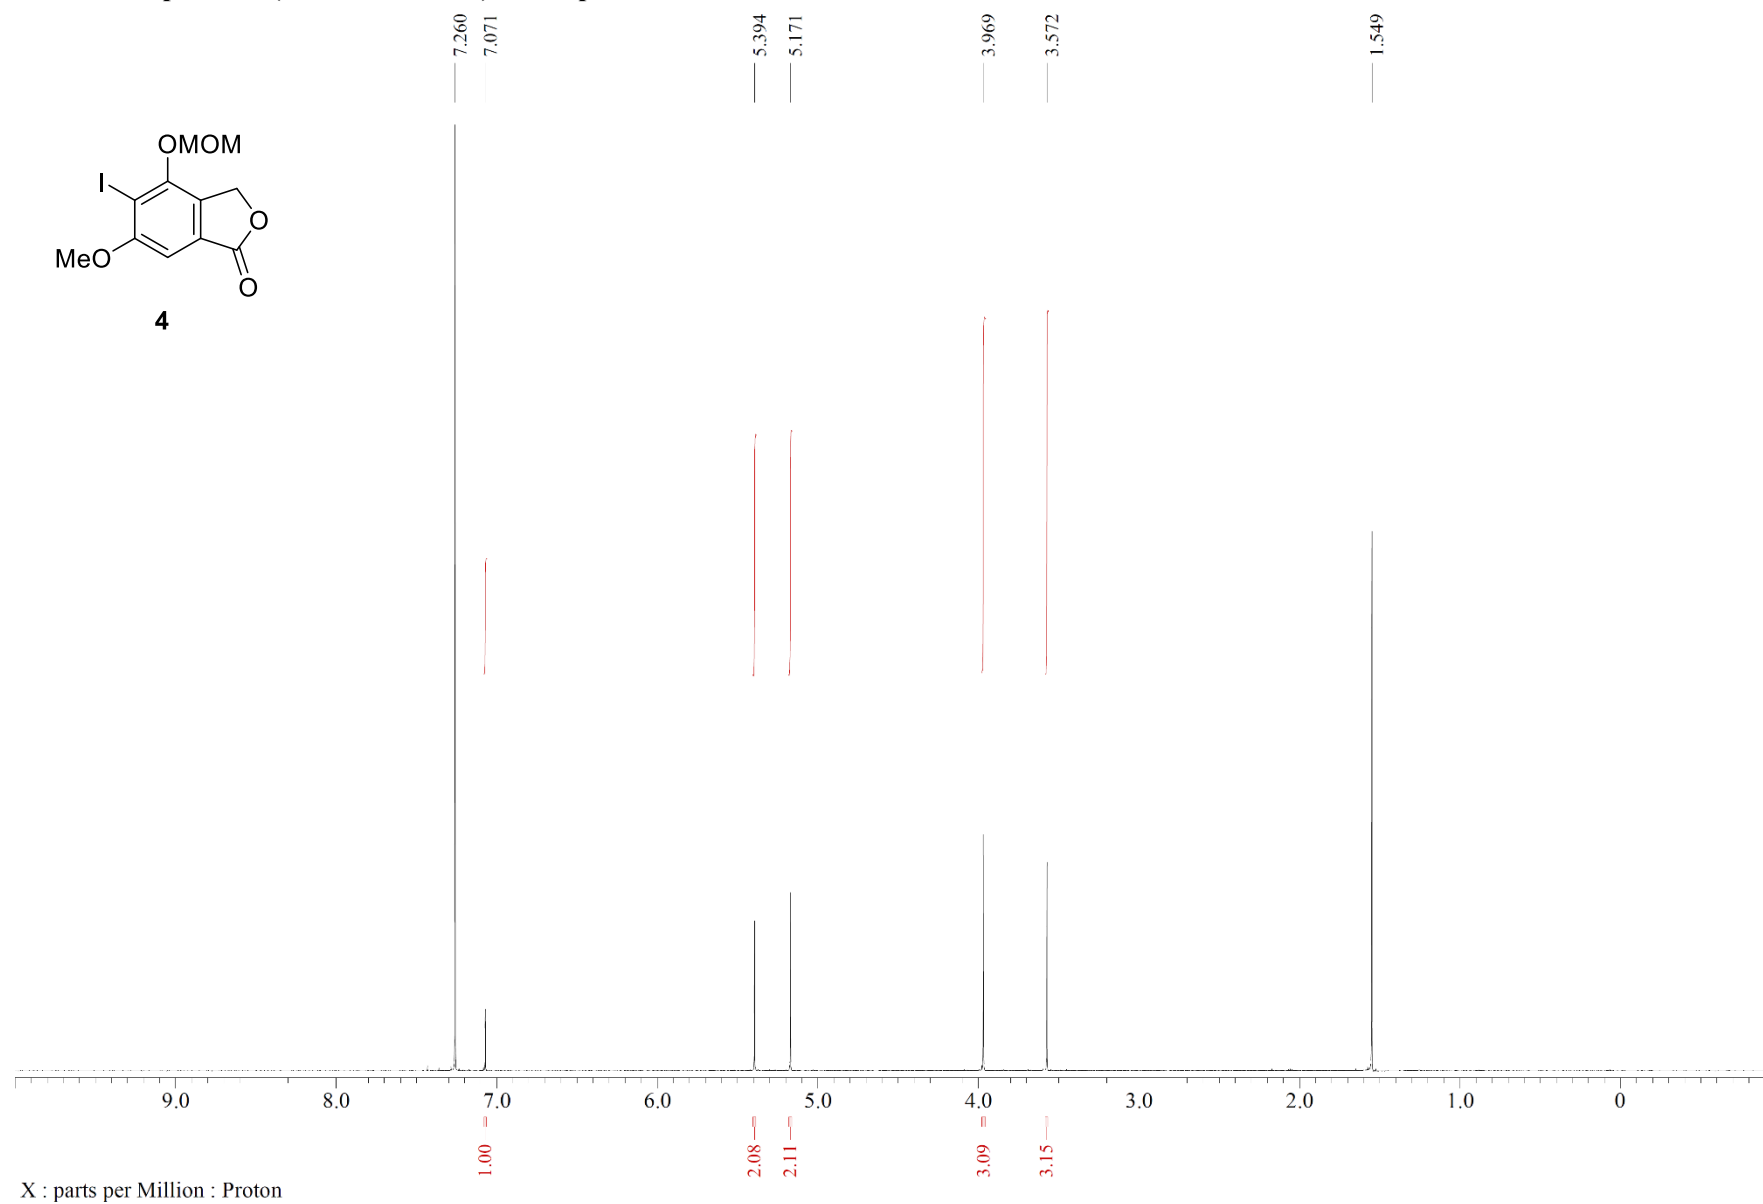

Figure S10.  $^{13}\text{C}$  NMR spectrum (150 MHz,  $\text{CDCl}_3$ ) of compound 4.

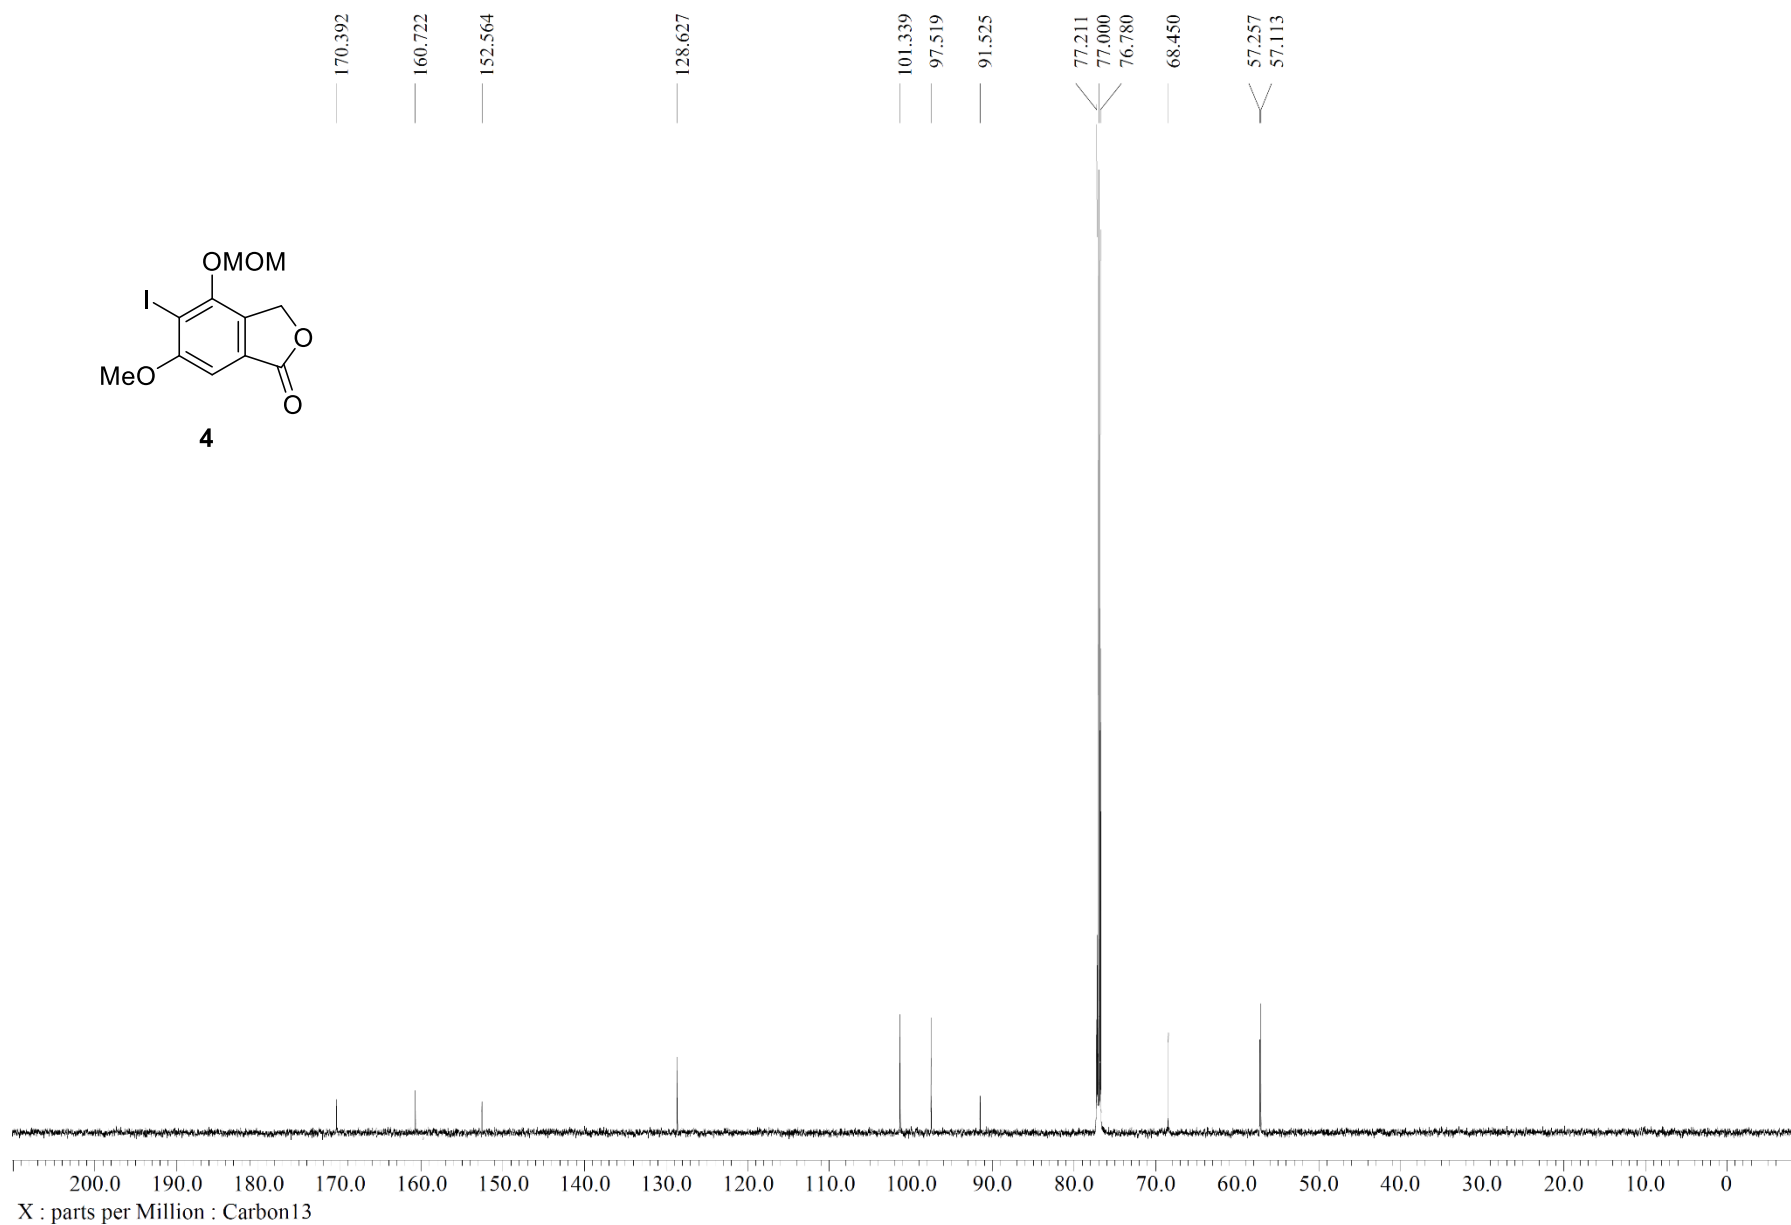

Figure S11.  $^{13}\text{C}$  NMR spectrum (150 MHz, acetone- $d_6$ ) of compound 4.

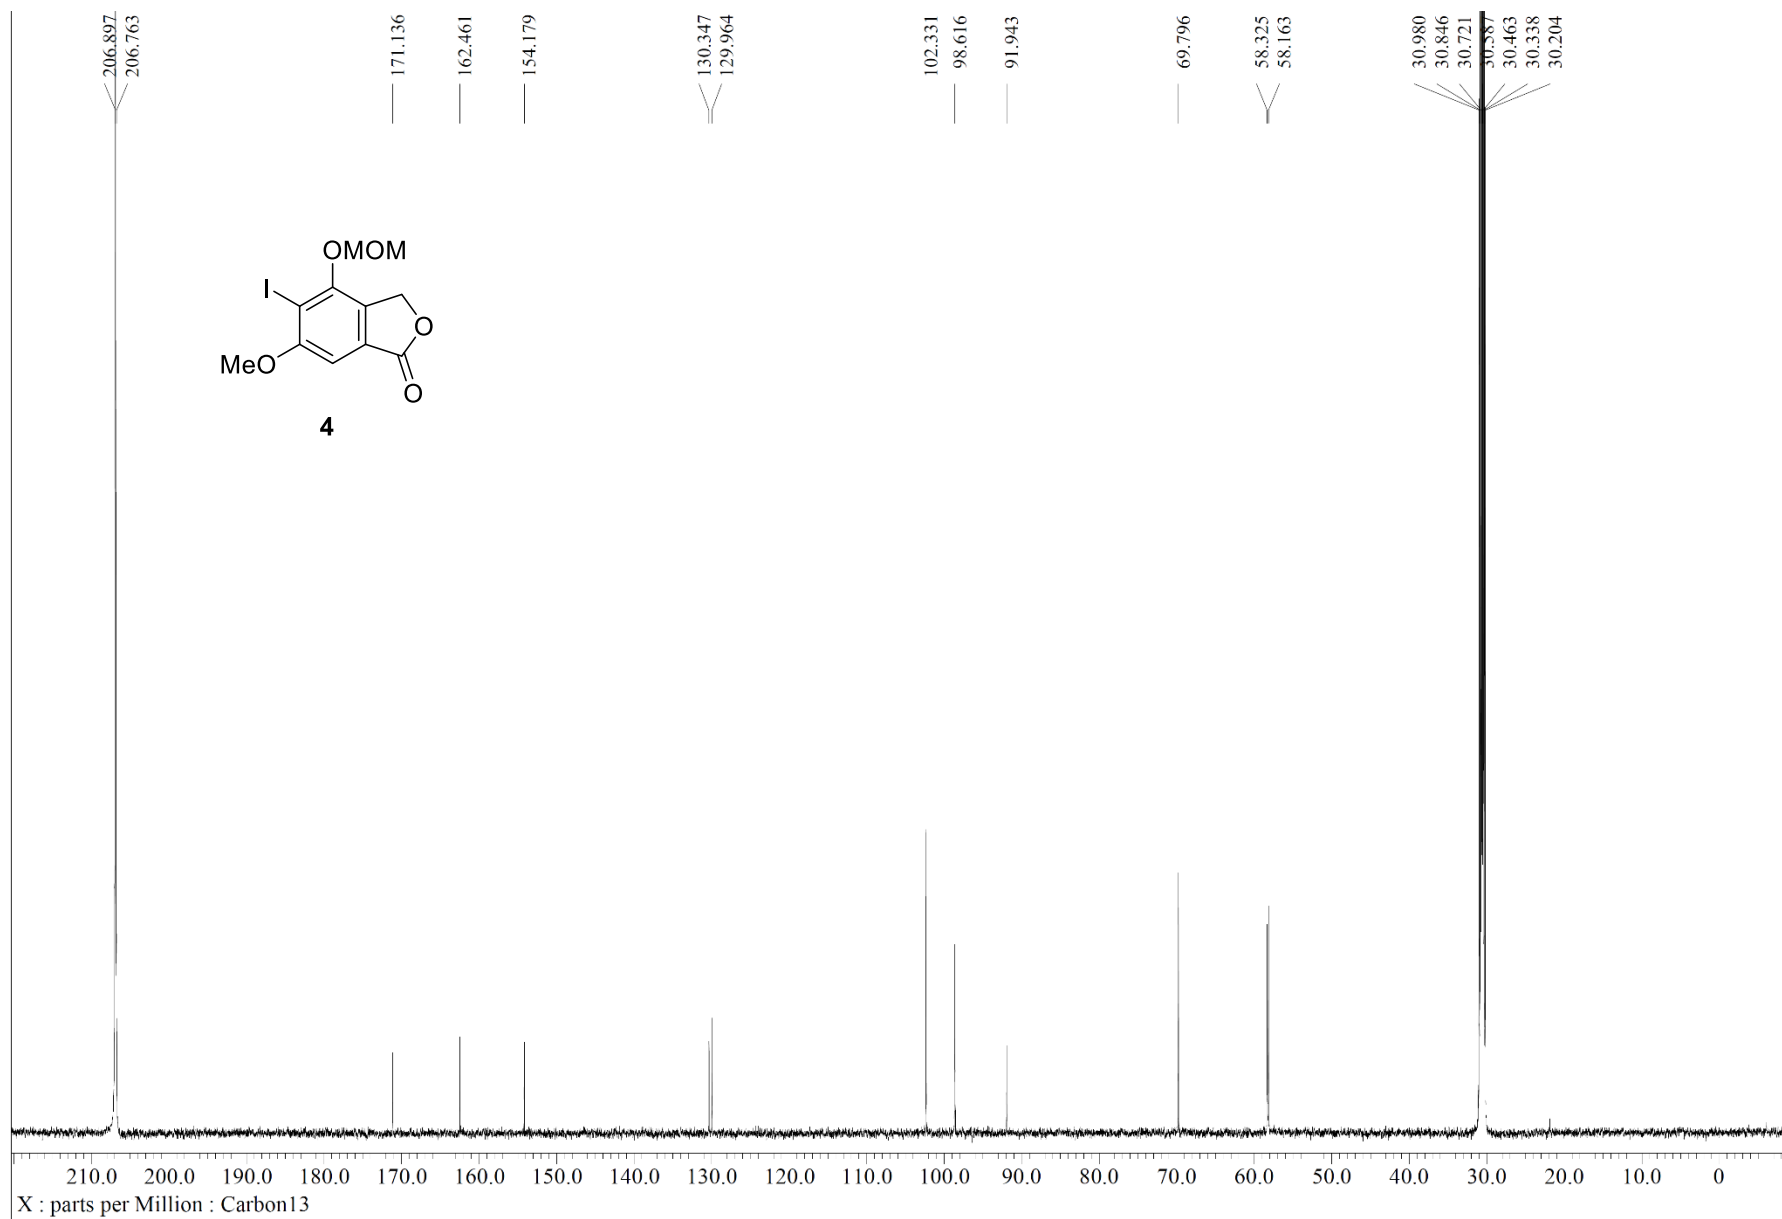

Figure S12. <sup>1</sup>H NMR spectrum (600 MHz, CDCl<sub>3</sub>) of compound 10.

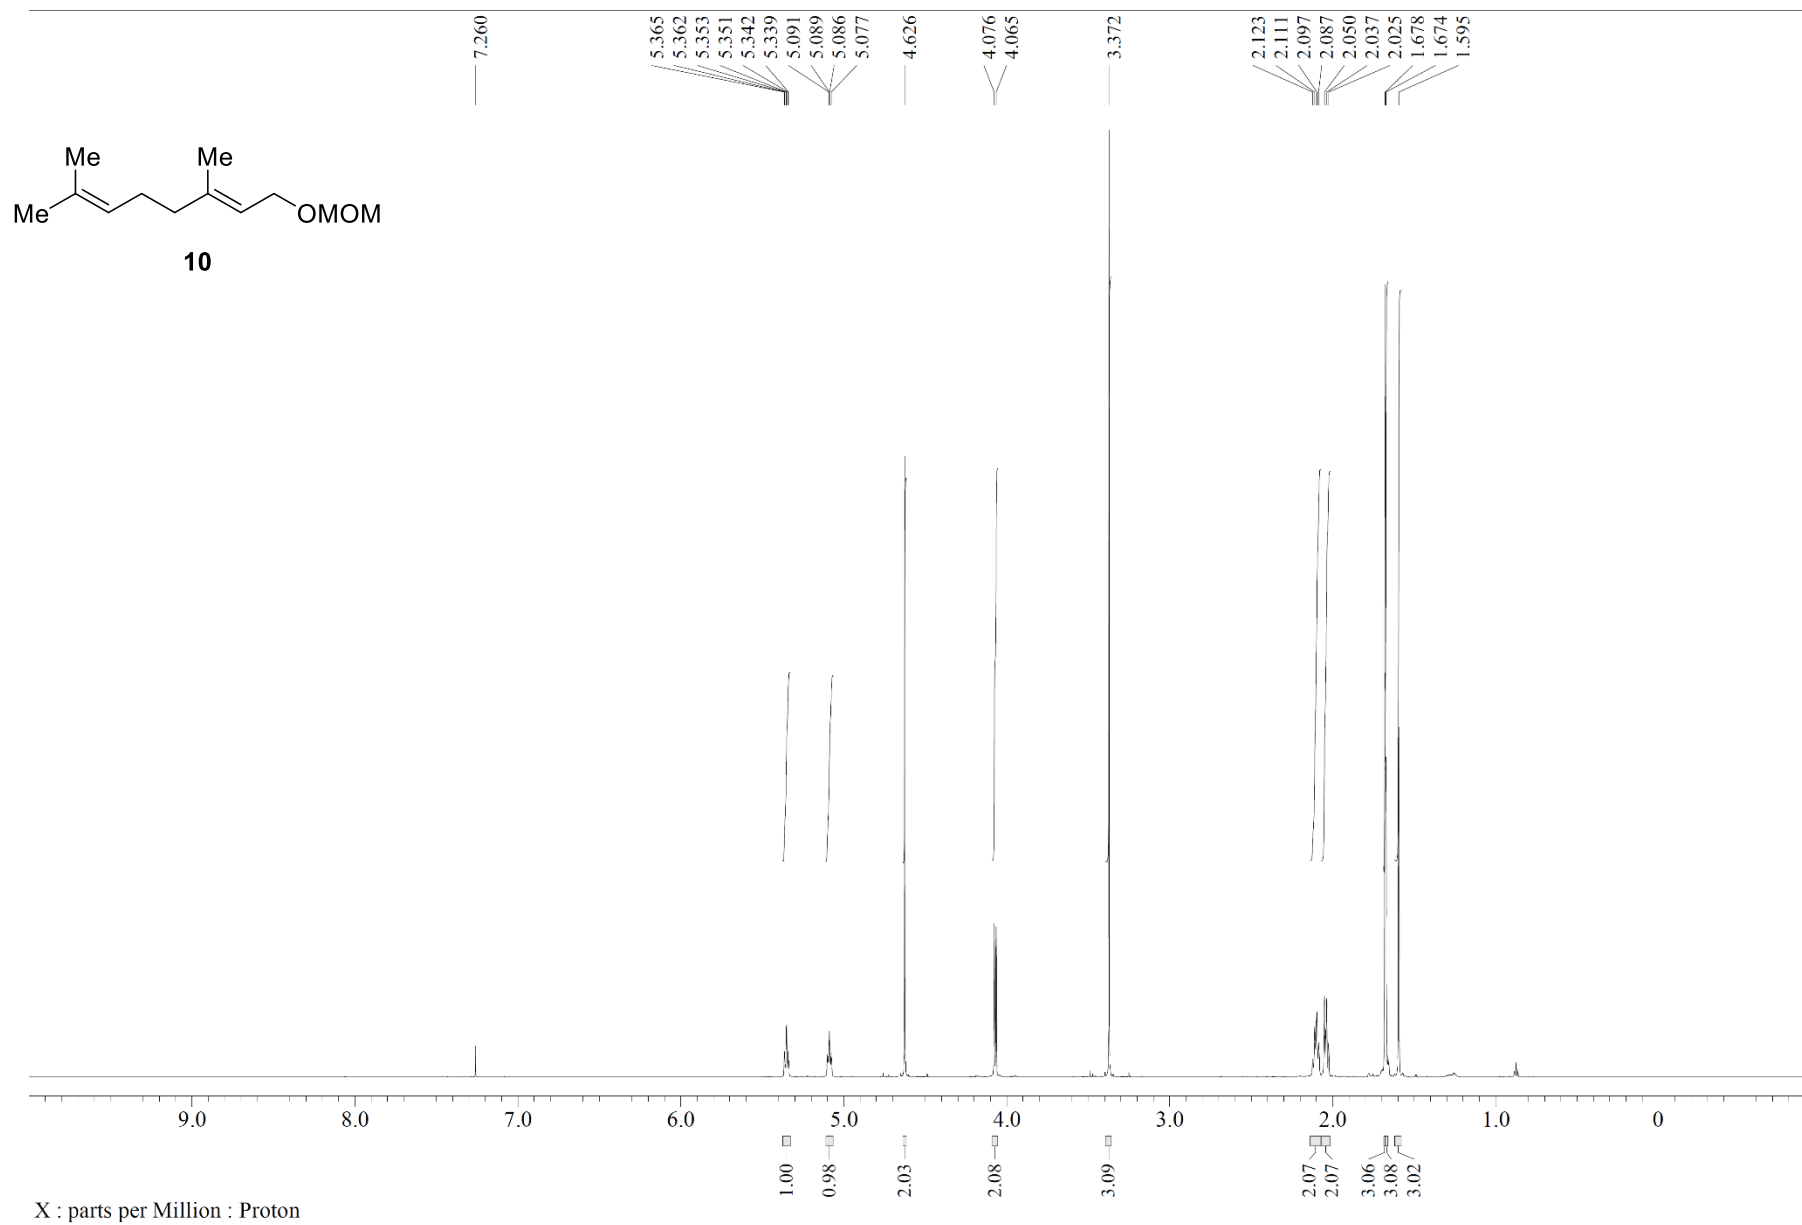

Figure S13. <sup>13</sup>C NMR spectrum (150 MHz, CDCl<sub>3</sub>) of compound 10.

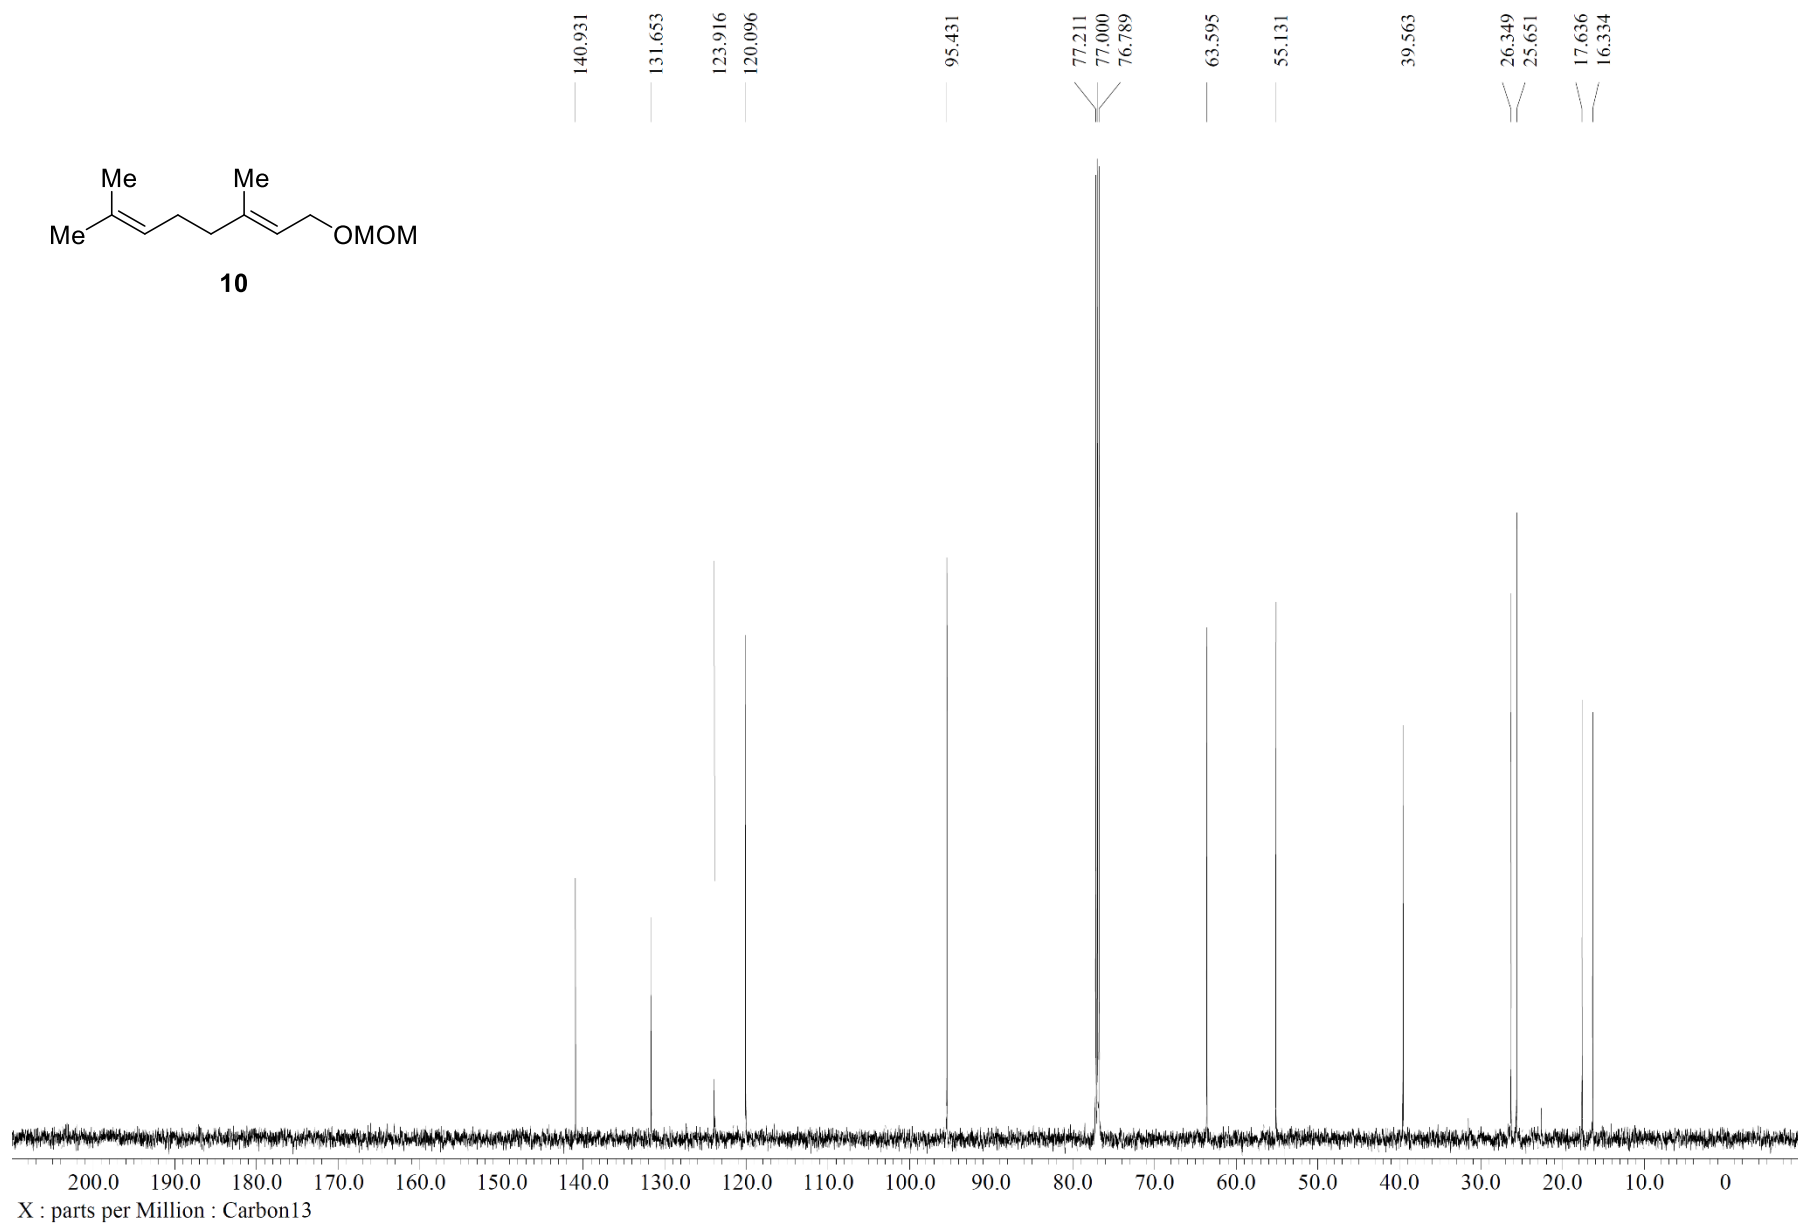

Figure S14. <sup>1</sup>H NMR spectrum (600 MHz, CDCl<sub>3</sub>) of compound 11.

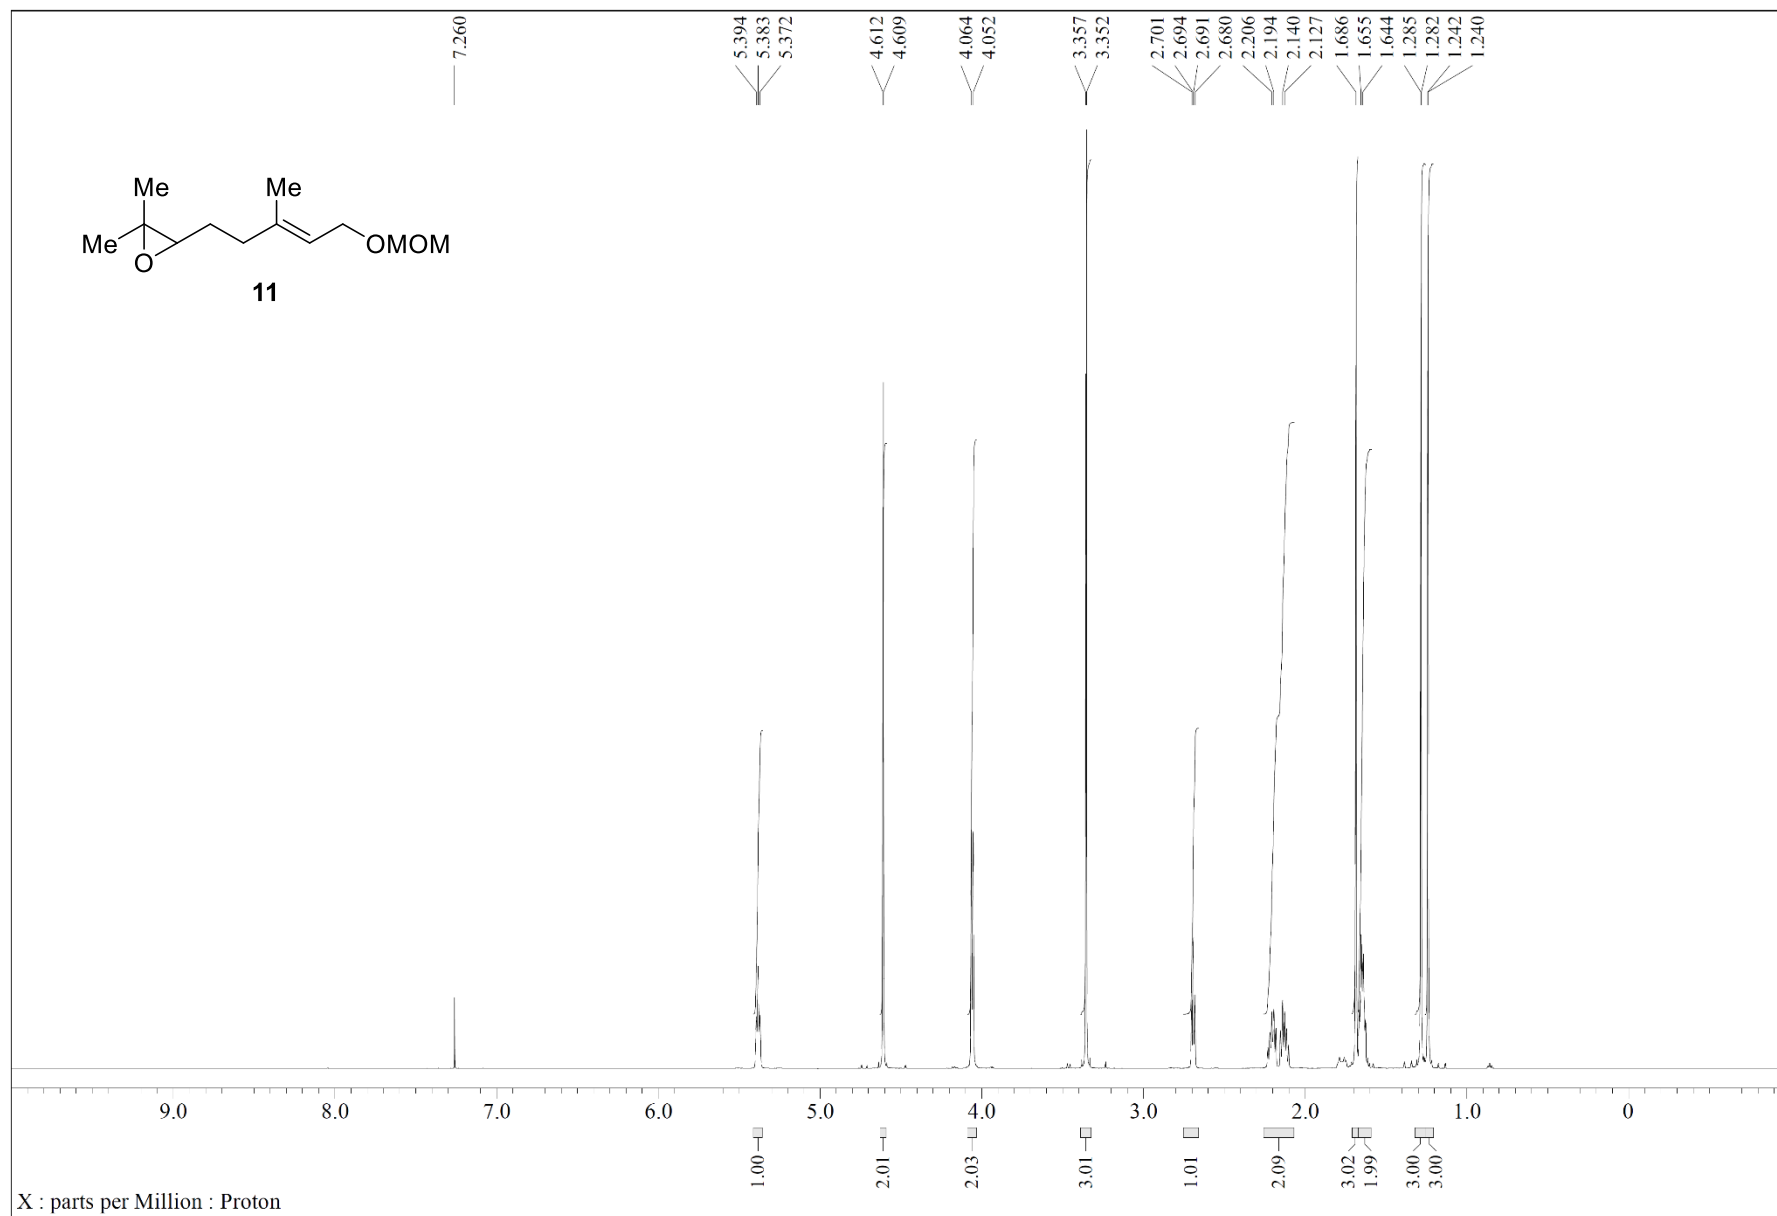



Figure S15.  $^{13}\text{C}$  NMR spectrum (150 MHz,  $\text{CDCl}_3$ ) of compound 11.

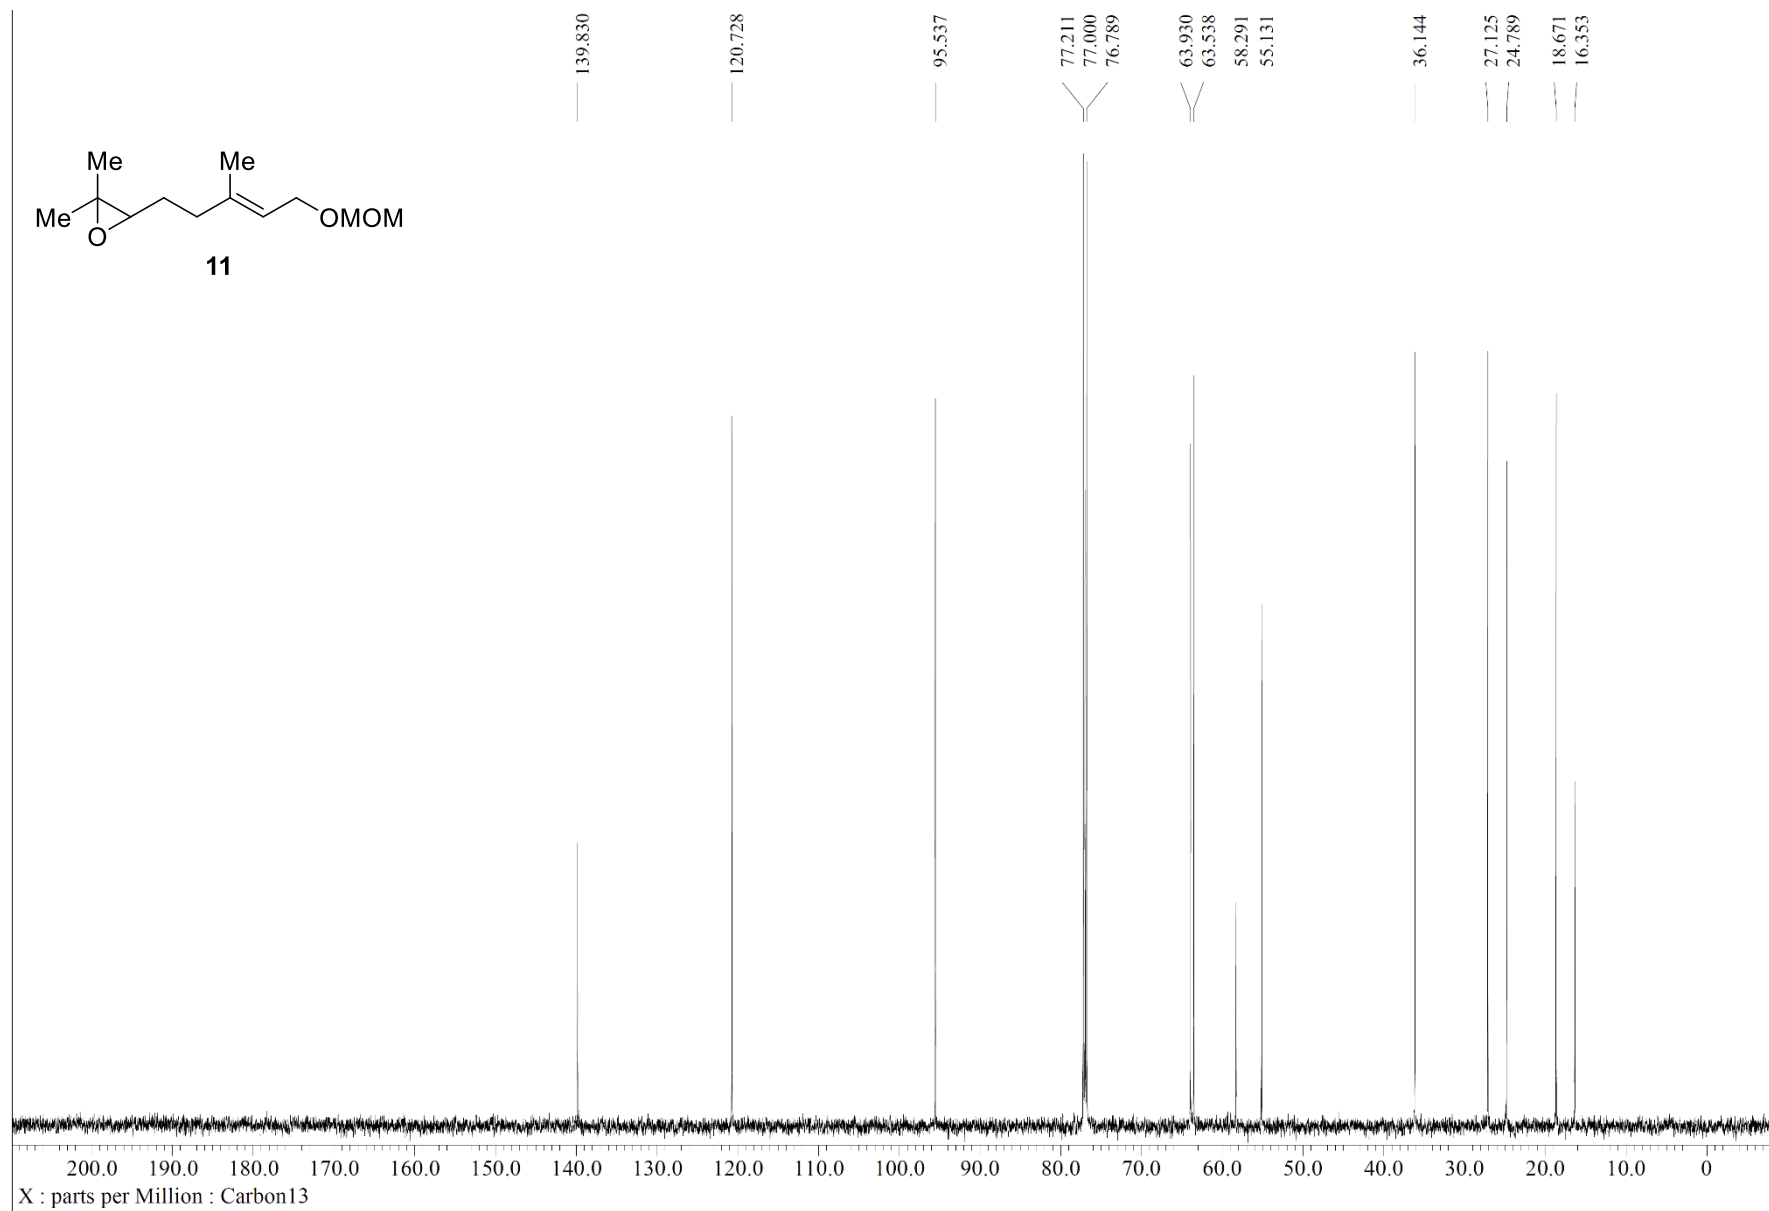

Figure S16. <sup>1</sup>H NMR spectrum (600 MHz, CDCl<sub>3</sub>) of compound 12.

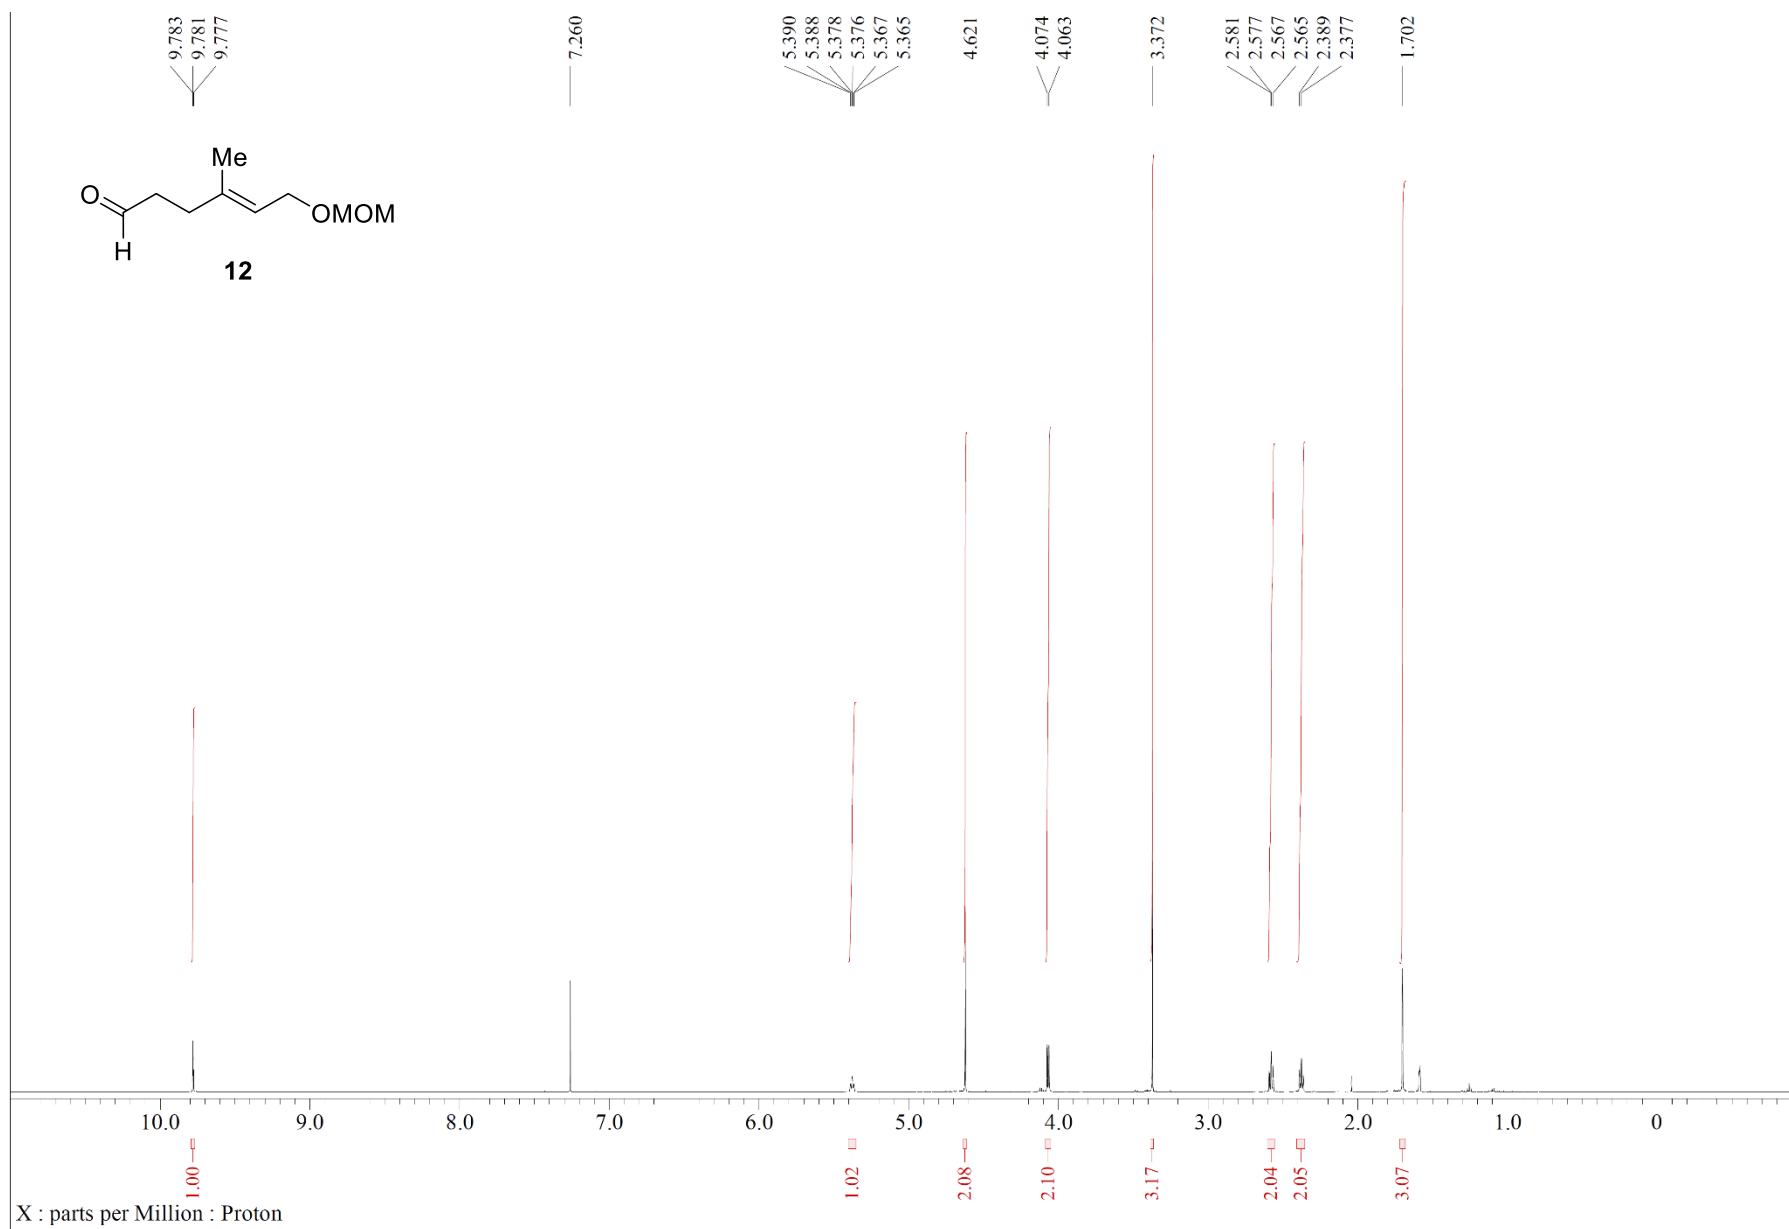

Figure S17.  $^{13}\text{C}$  NMR spectrum (150 MHz,  $\text{CDCl}_3$ ) of compound 12.

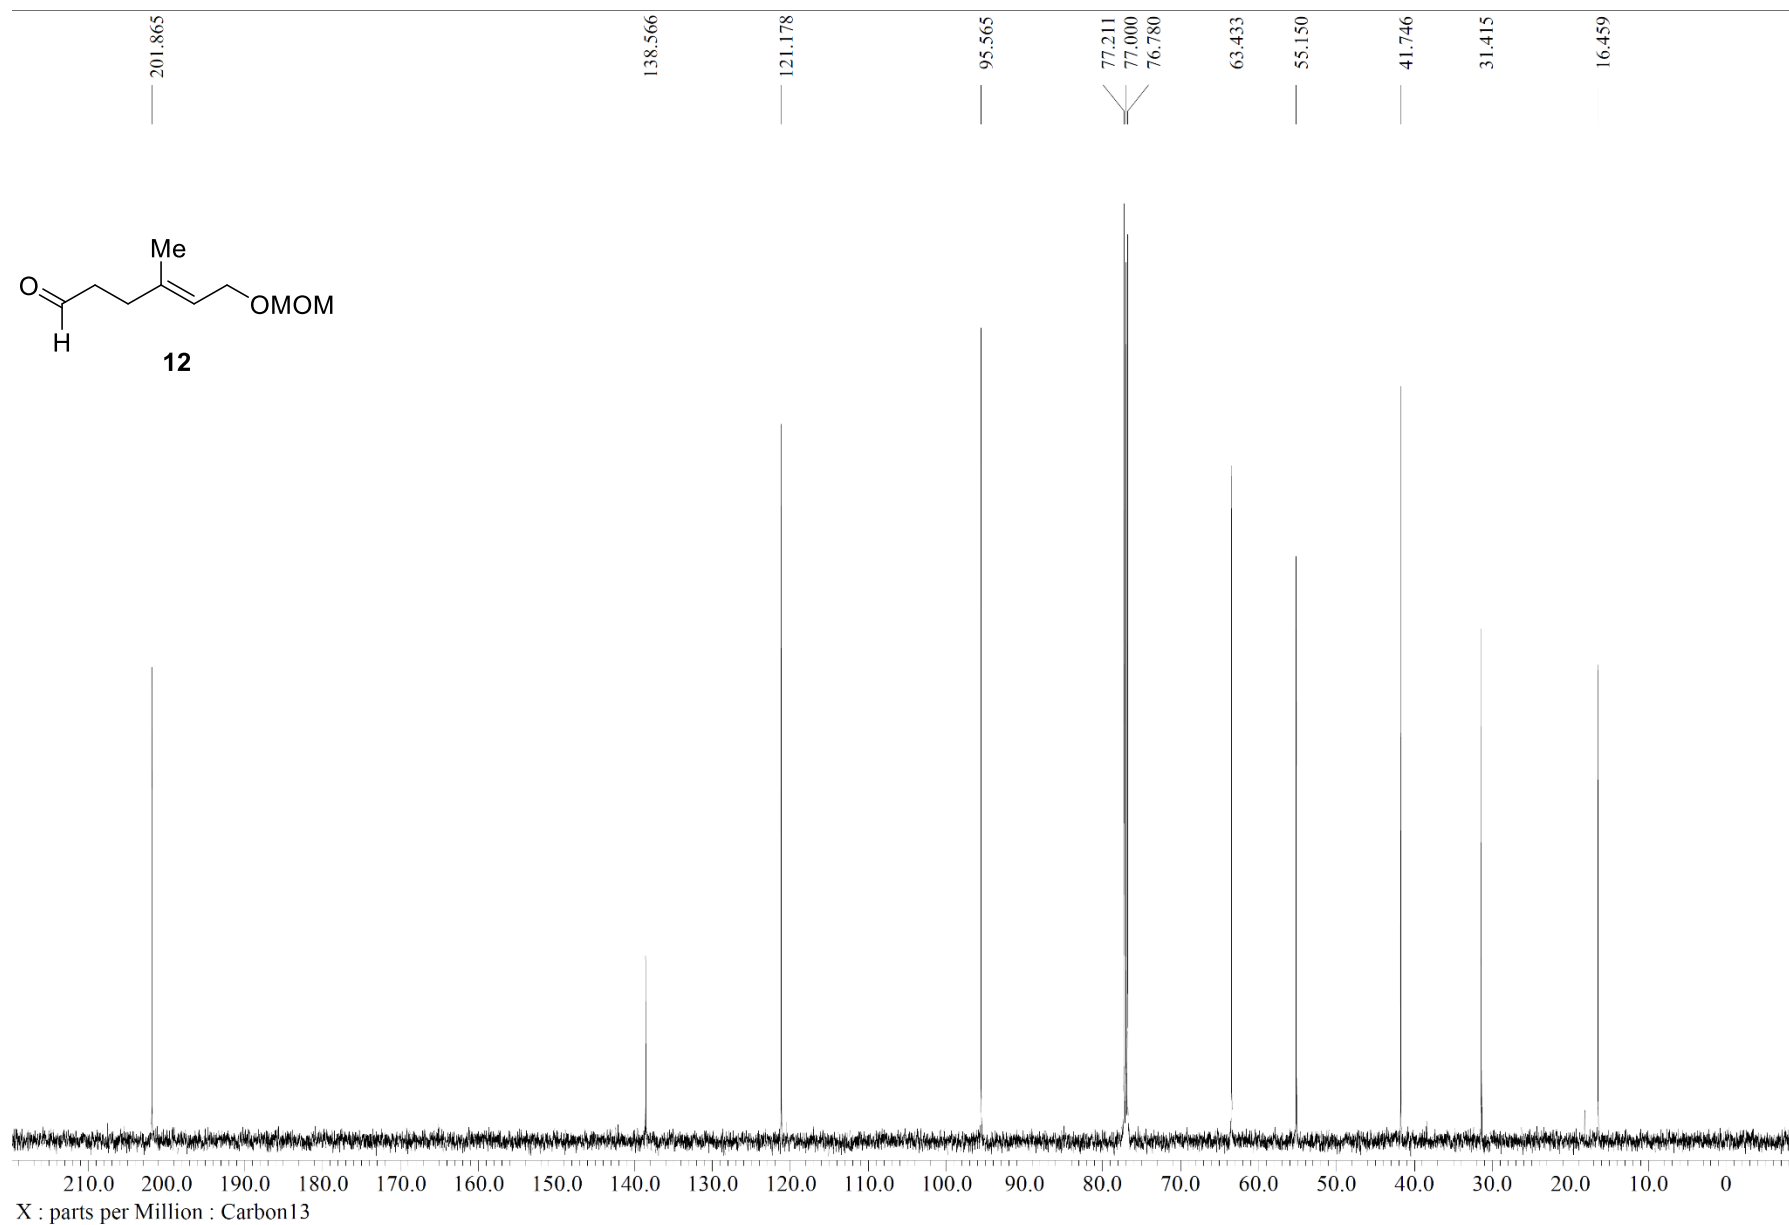

Figure S18. <sup>1</sup>H NMR spectrum (600 MHz, CDCl<sub>3</sub>) of compound 13.

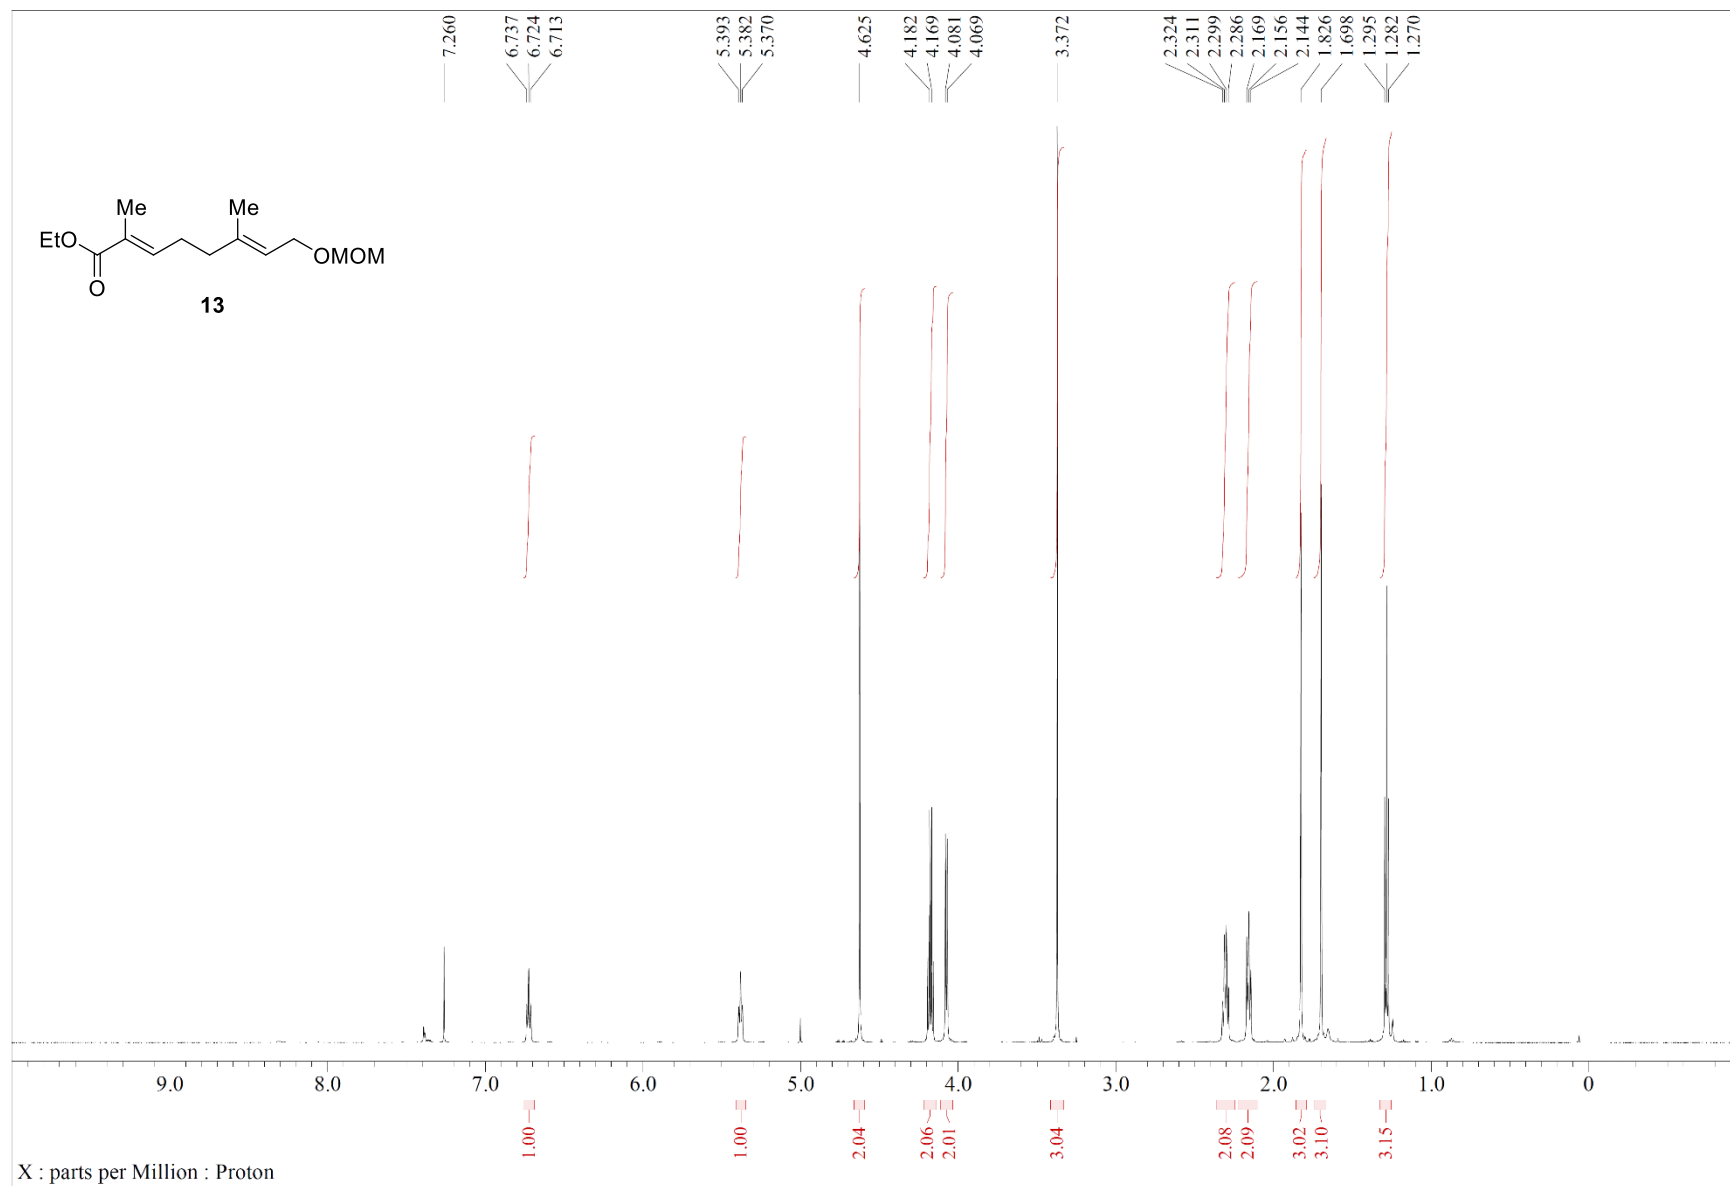

Figure S19.  $^{13}\text{C}$  NMR spectrum (150 MHz,  $\text{CDCl}_3$ ) of compound 13.

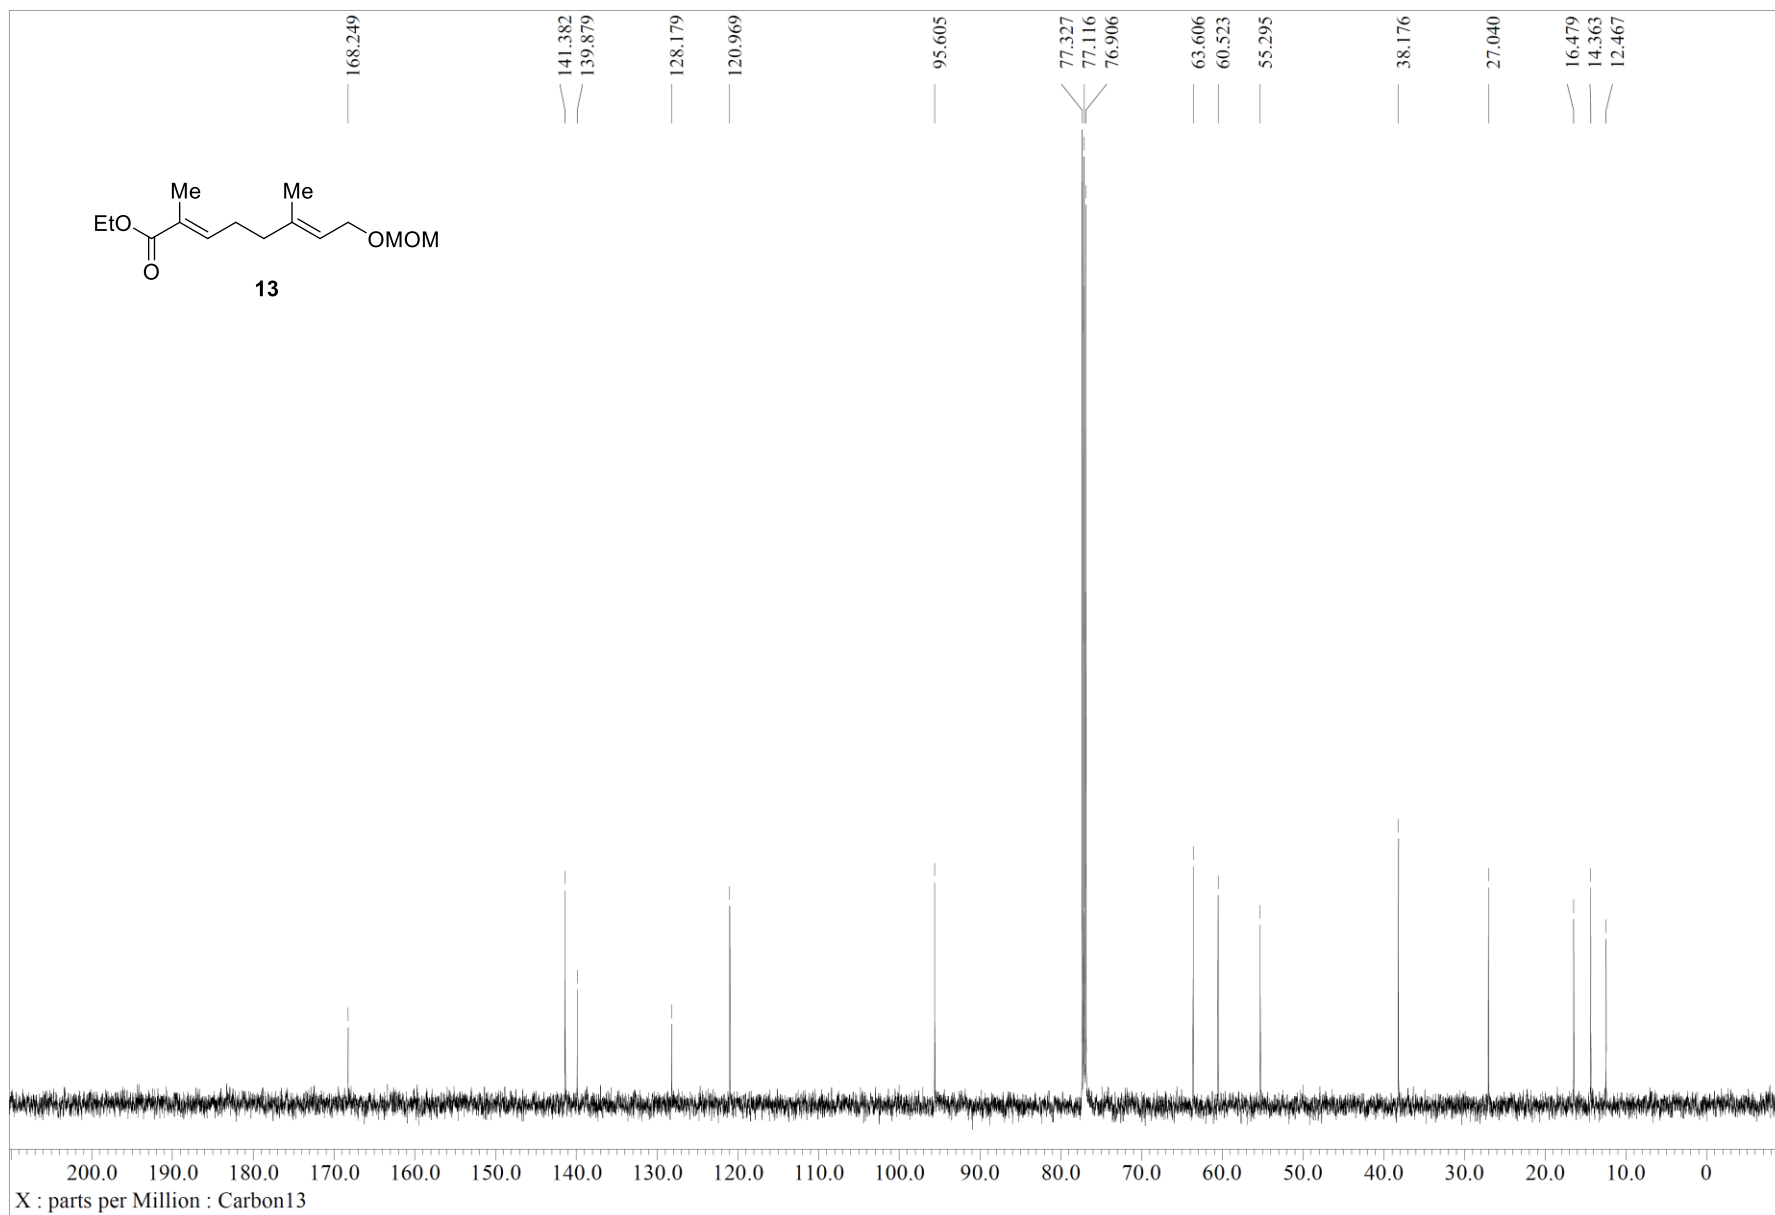

Figure S20. <sup>1</sup>H NMR spectrum (600 MHz, CDCl<sub>3</sub>) of compound 14.

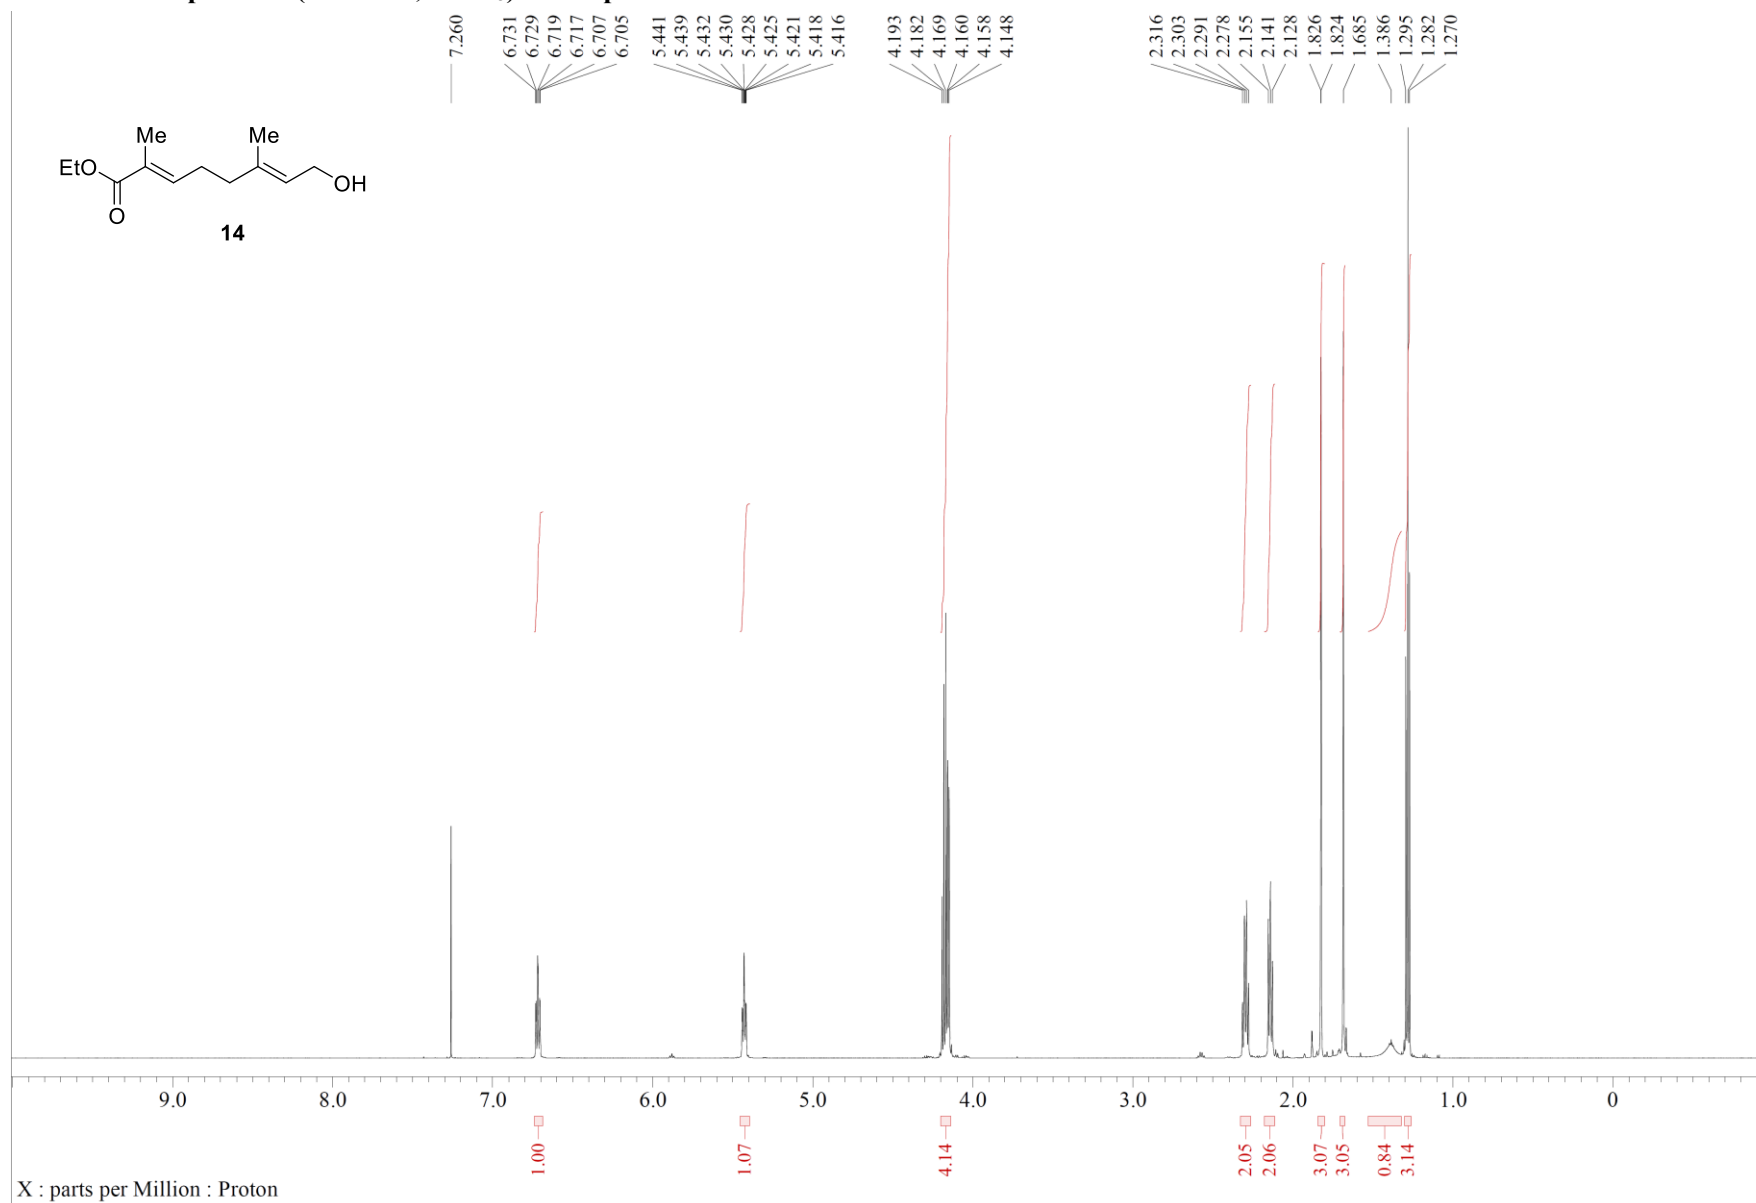

Figure S21.  $^{13}\text{C}$  NMR spectrum (150 MHz,  $\text{CDCl}_3$ ) of compound 14.

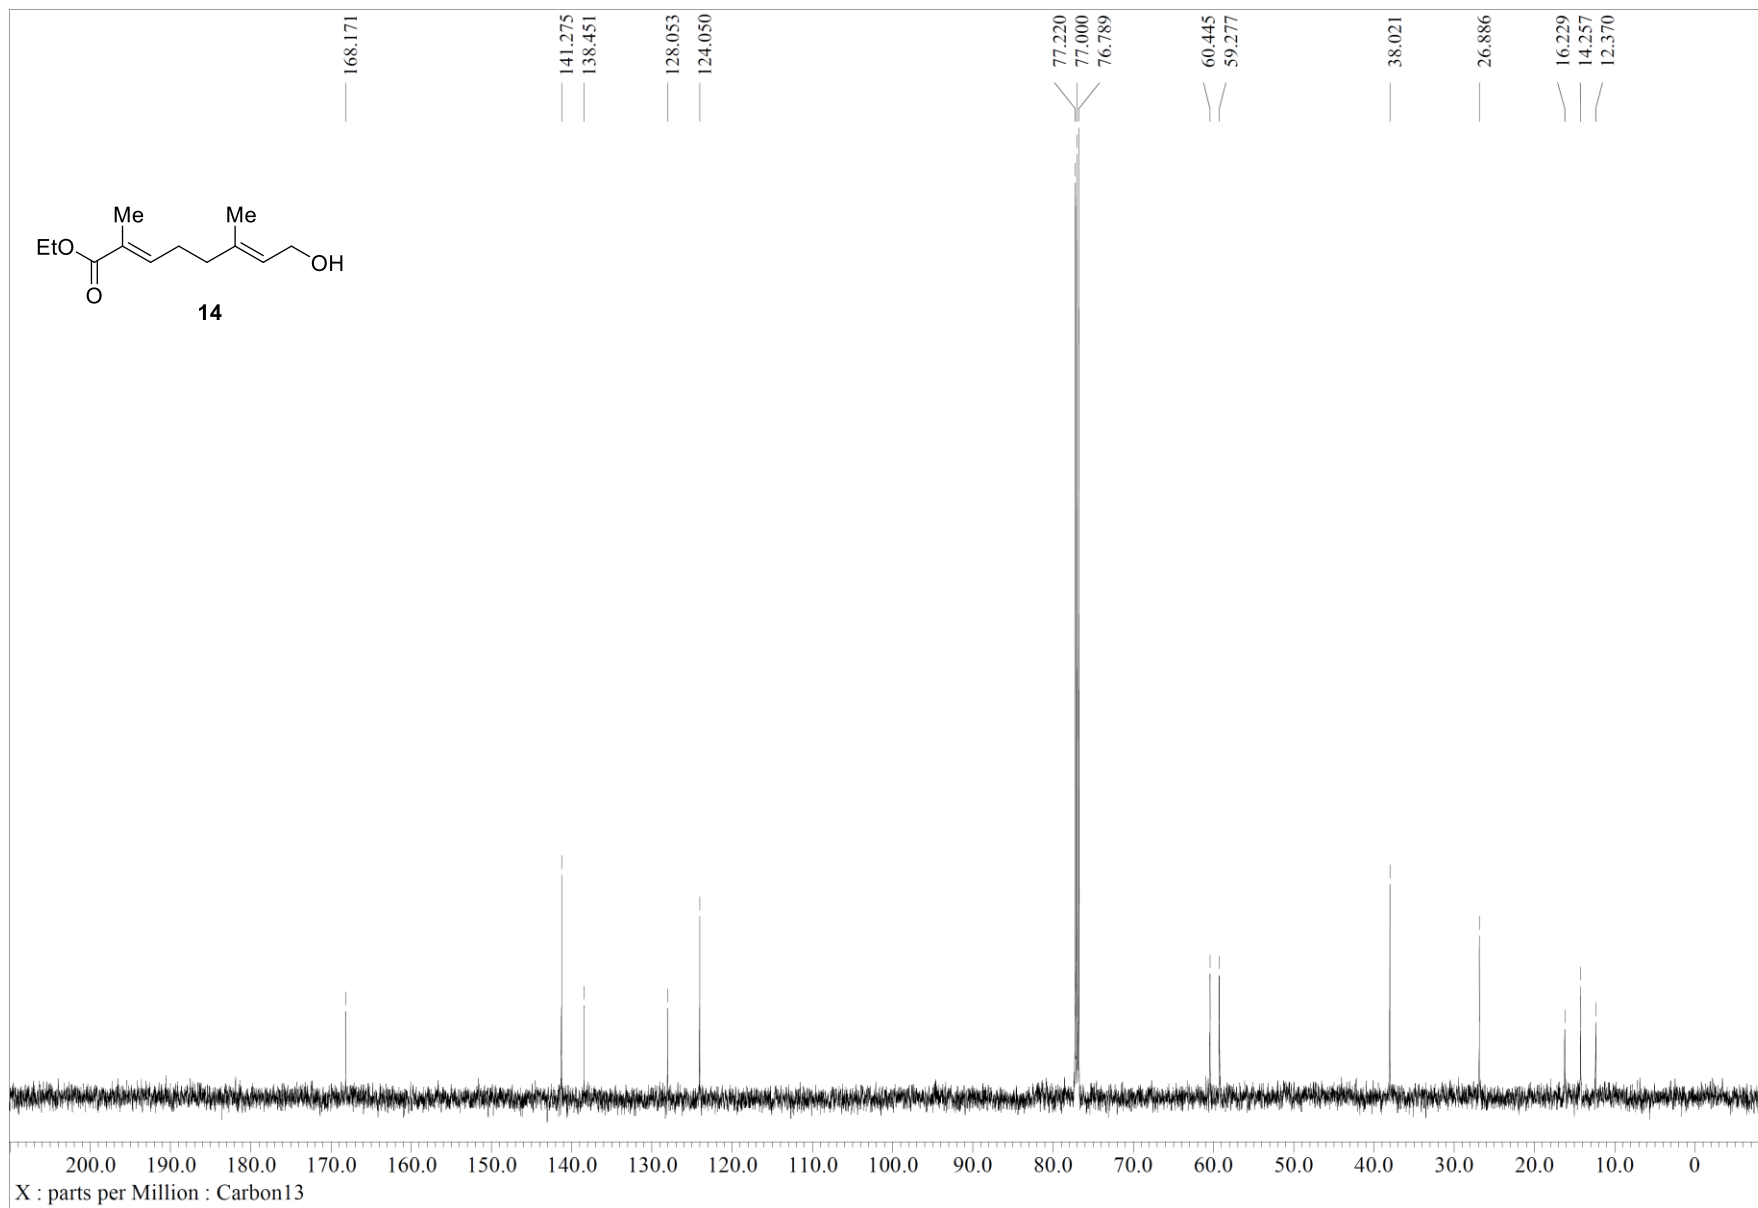

Figure S22. <sup>1</sup>H NMR spectrum (600 MHz, CDCl<sub>3</sub>) of compound 2.

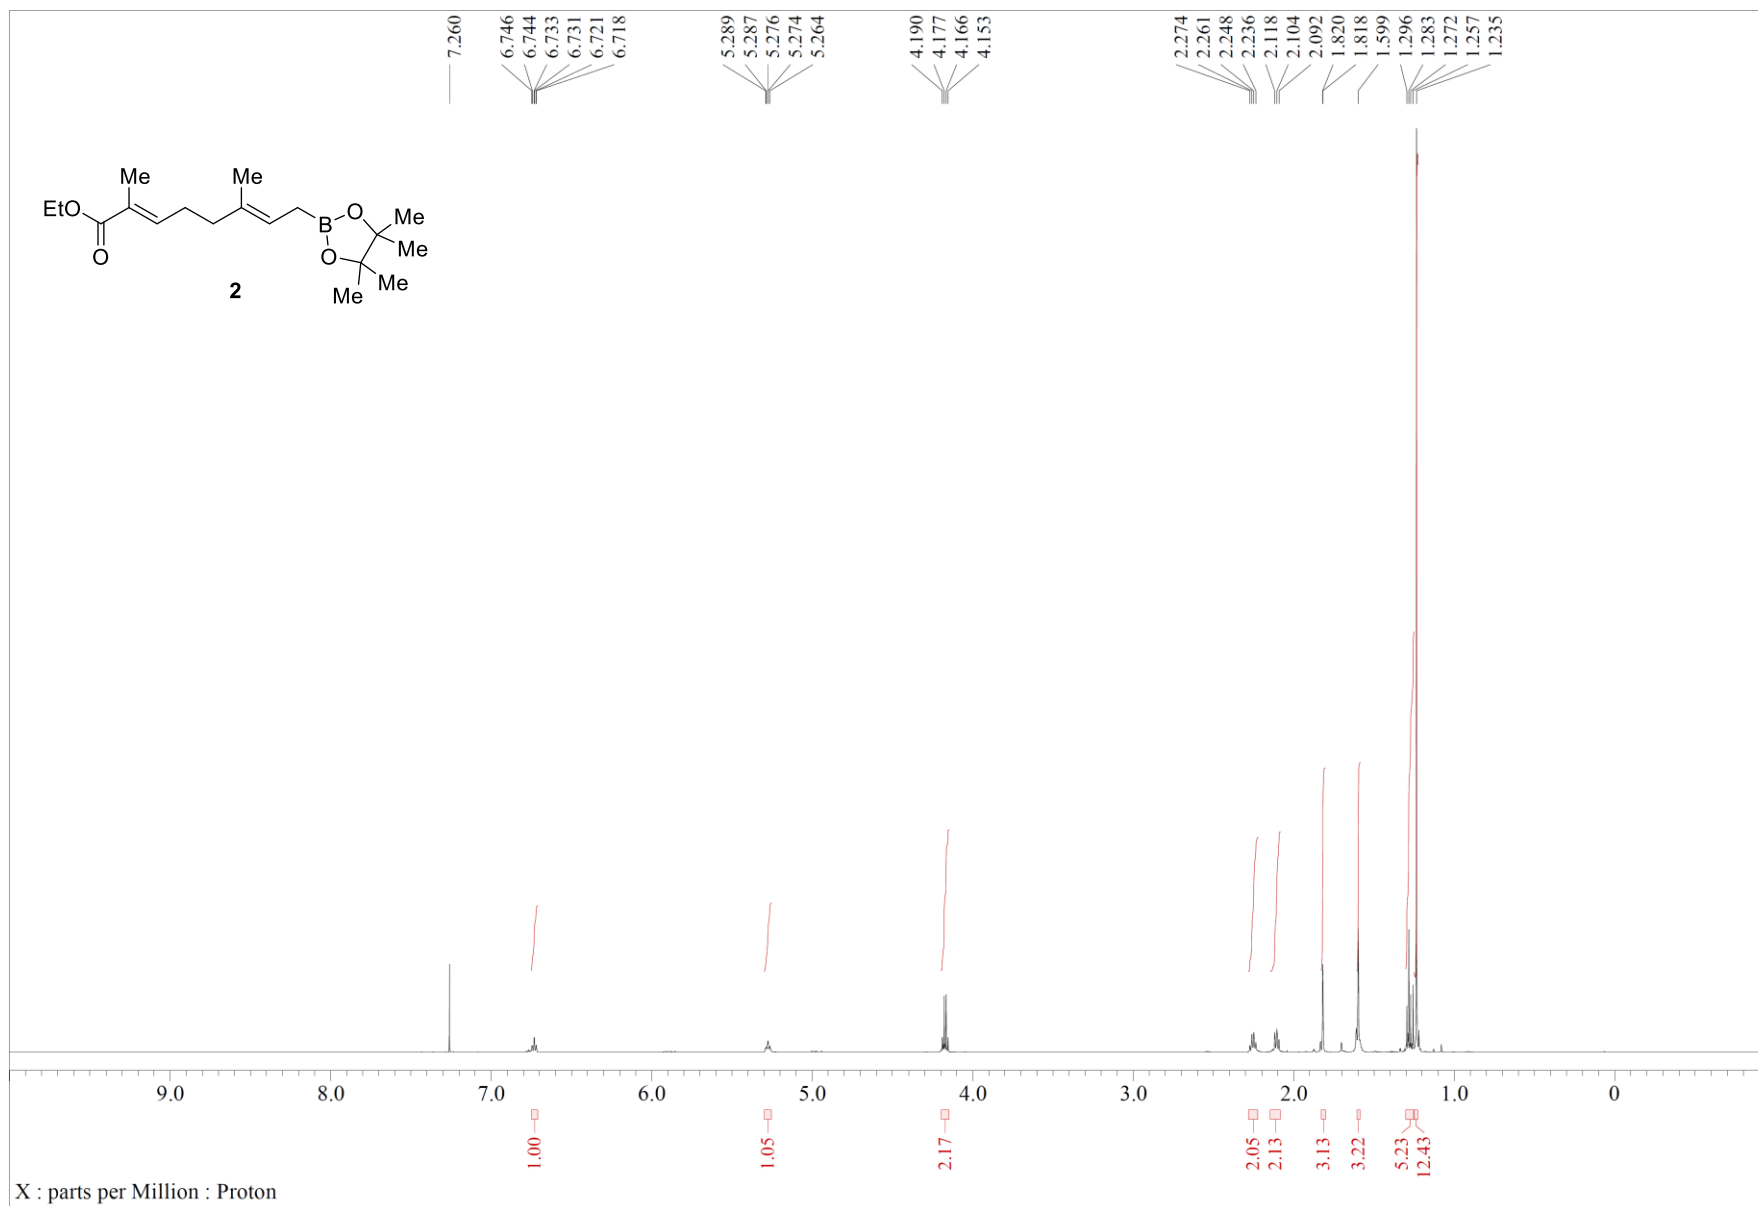



Figure S23.  $^{13}\text{C}$  NMR spectrum (150 MHz,  $\text{CDCl}_3$ ) of compound 2.

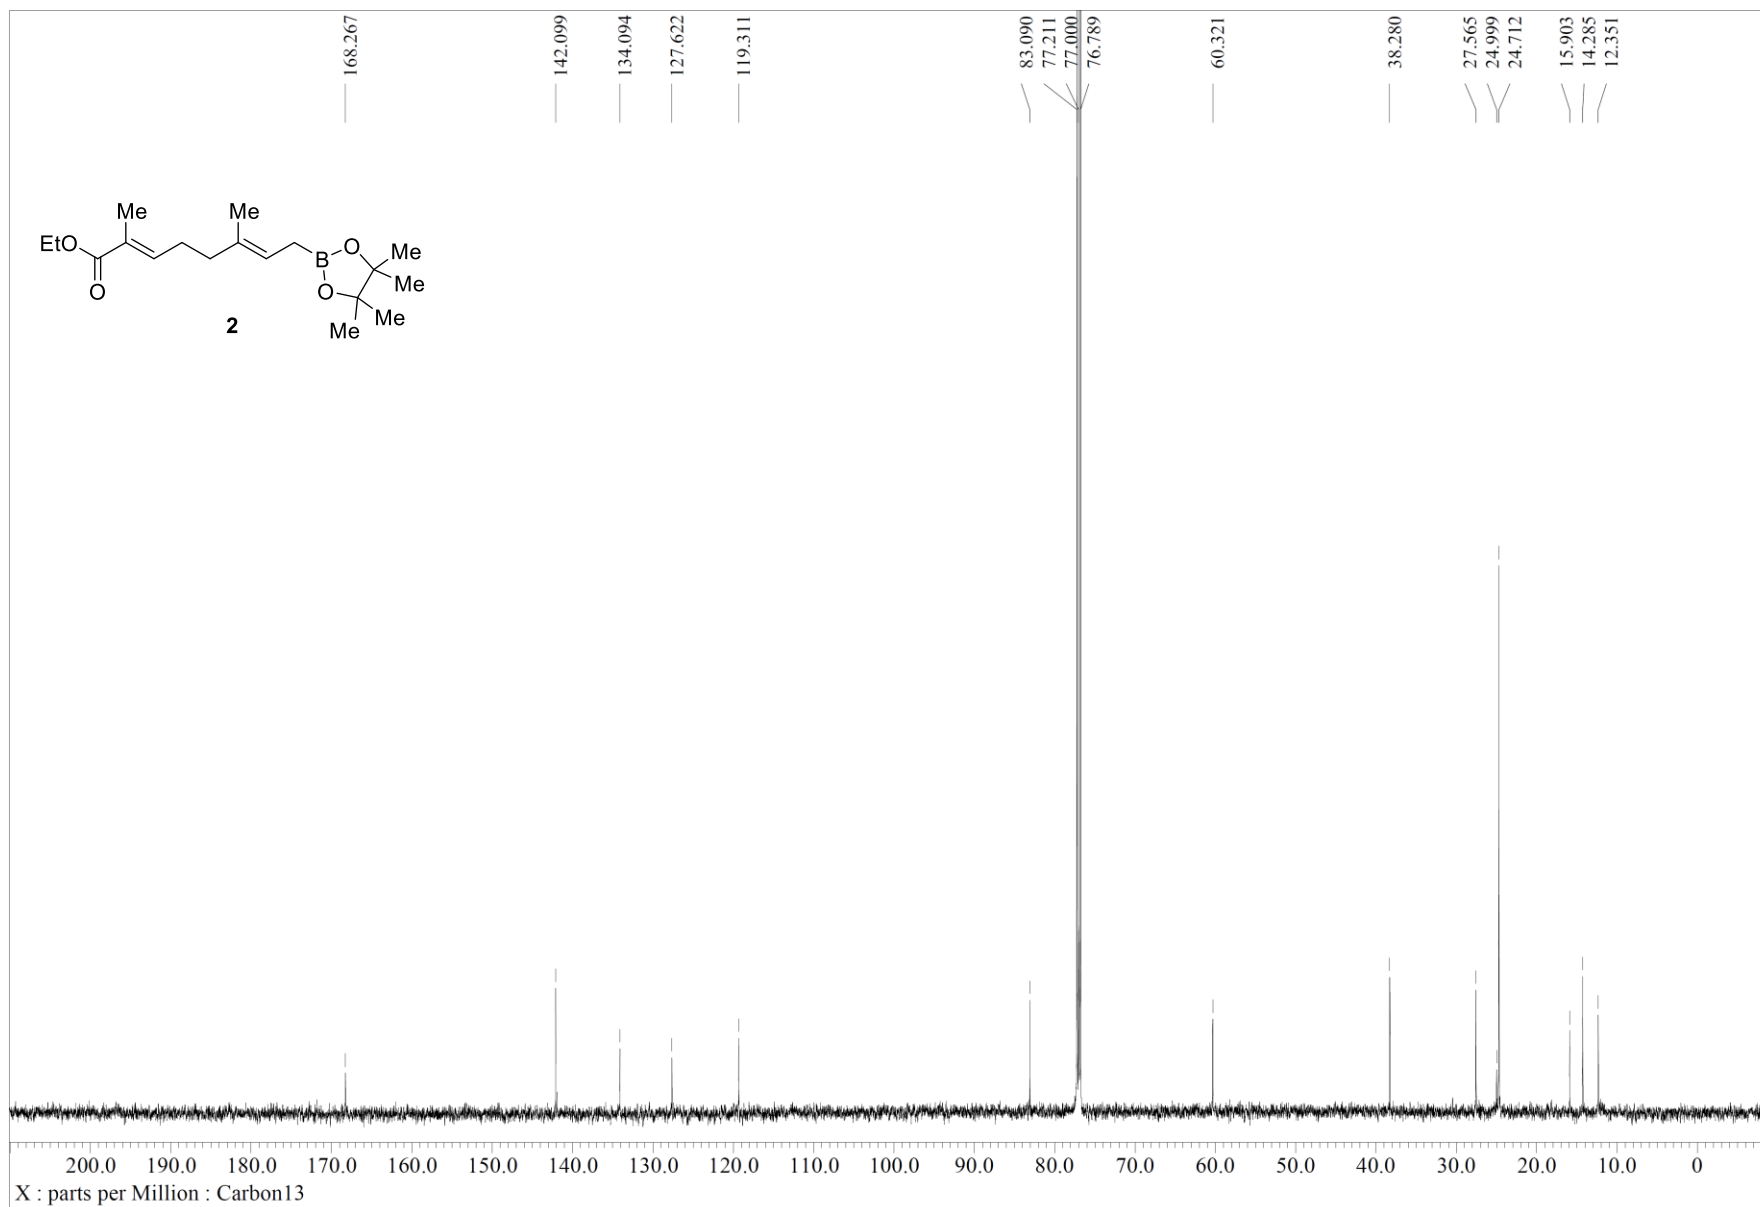

Figure S24. <sup>1</sup>H NMR spectrum (600 MHz, CDCl<sub>3</sub>) of compound 15.

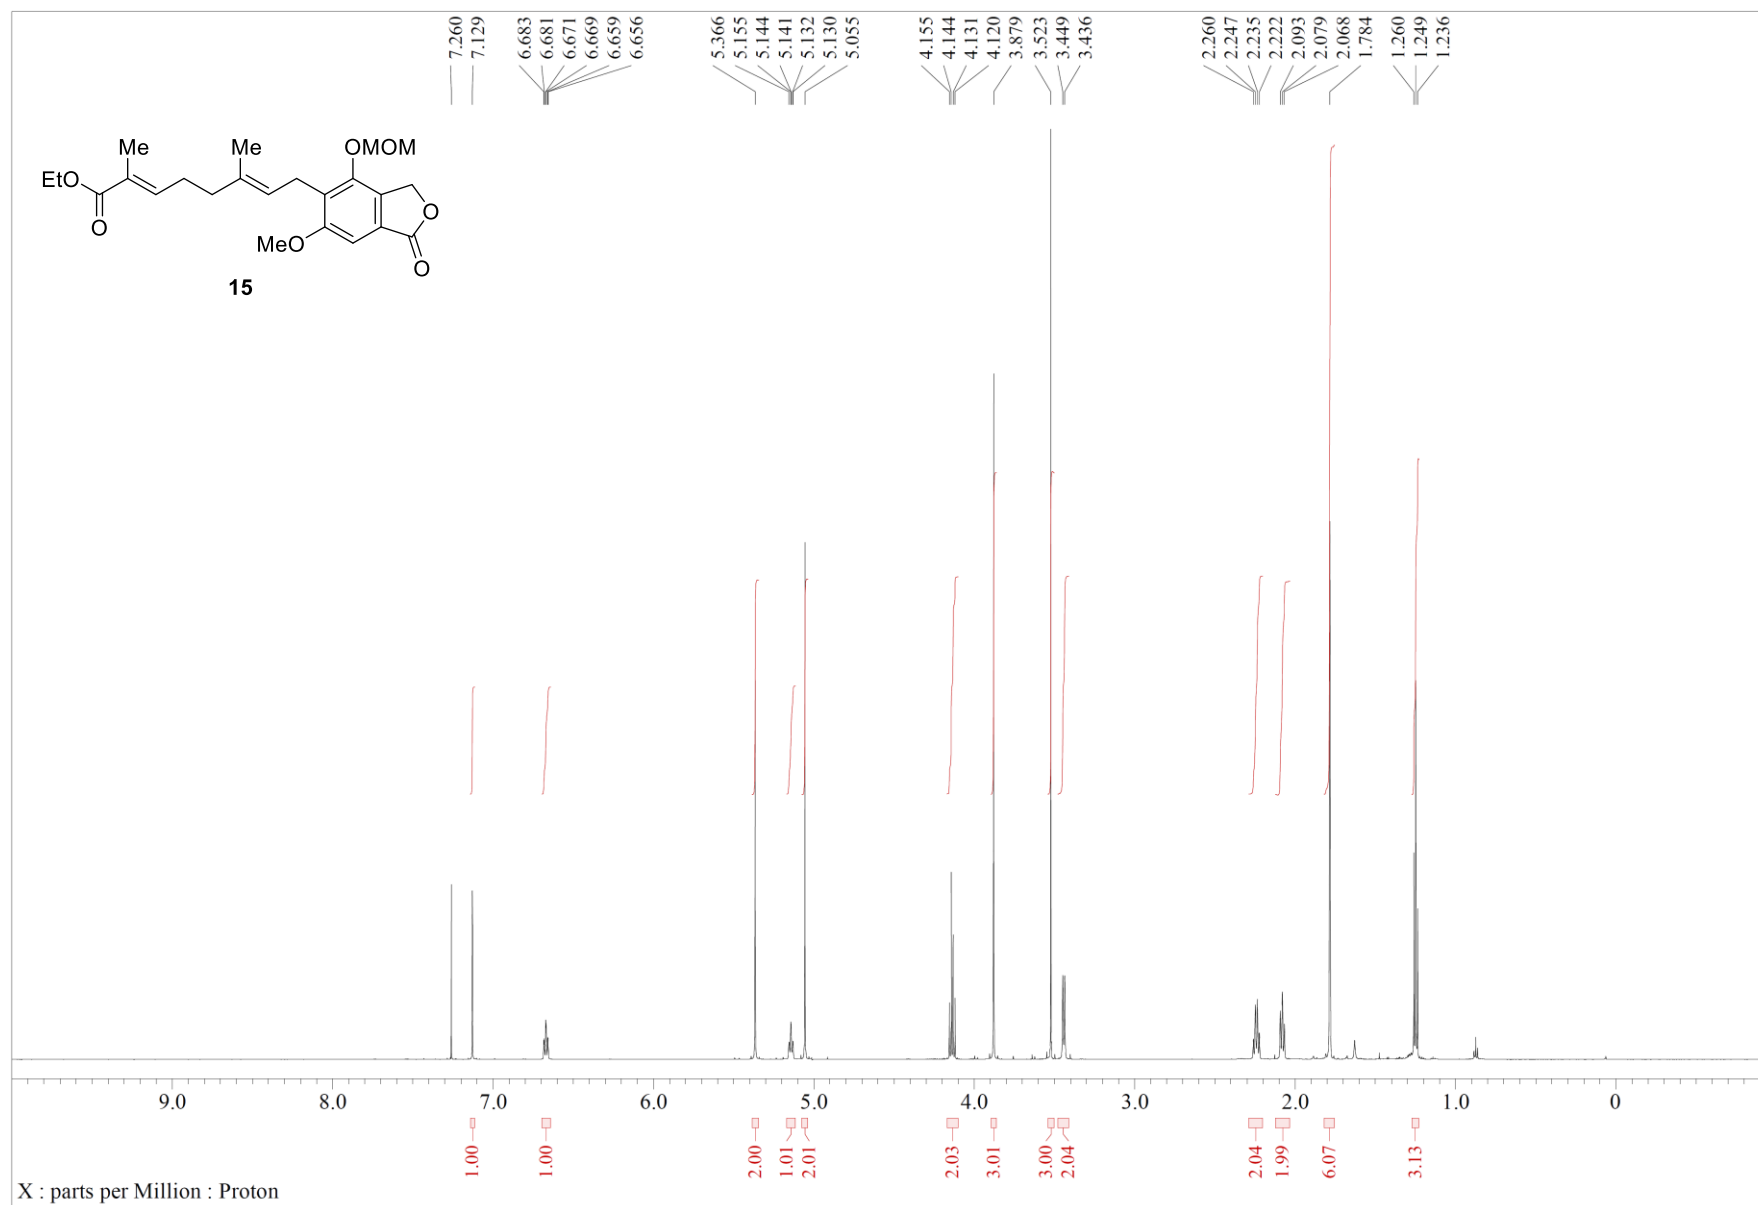

Figure S25. <sup>13</sup>C NMR spectrum (150 MHz, CDCl<sub>3</sub>) of compound 15.

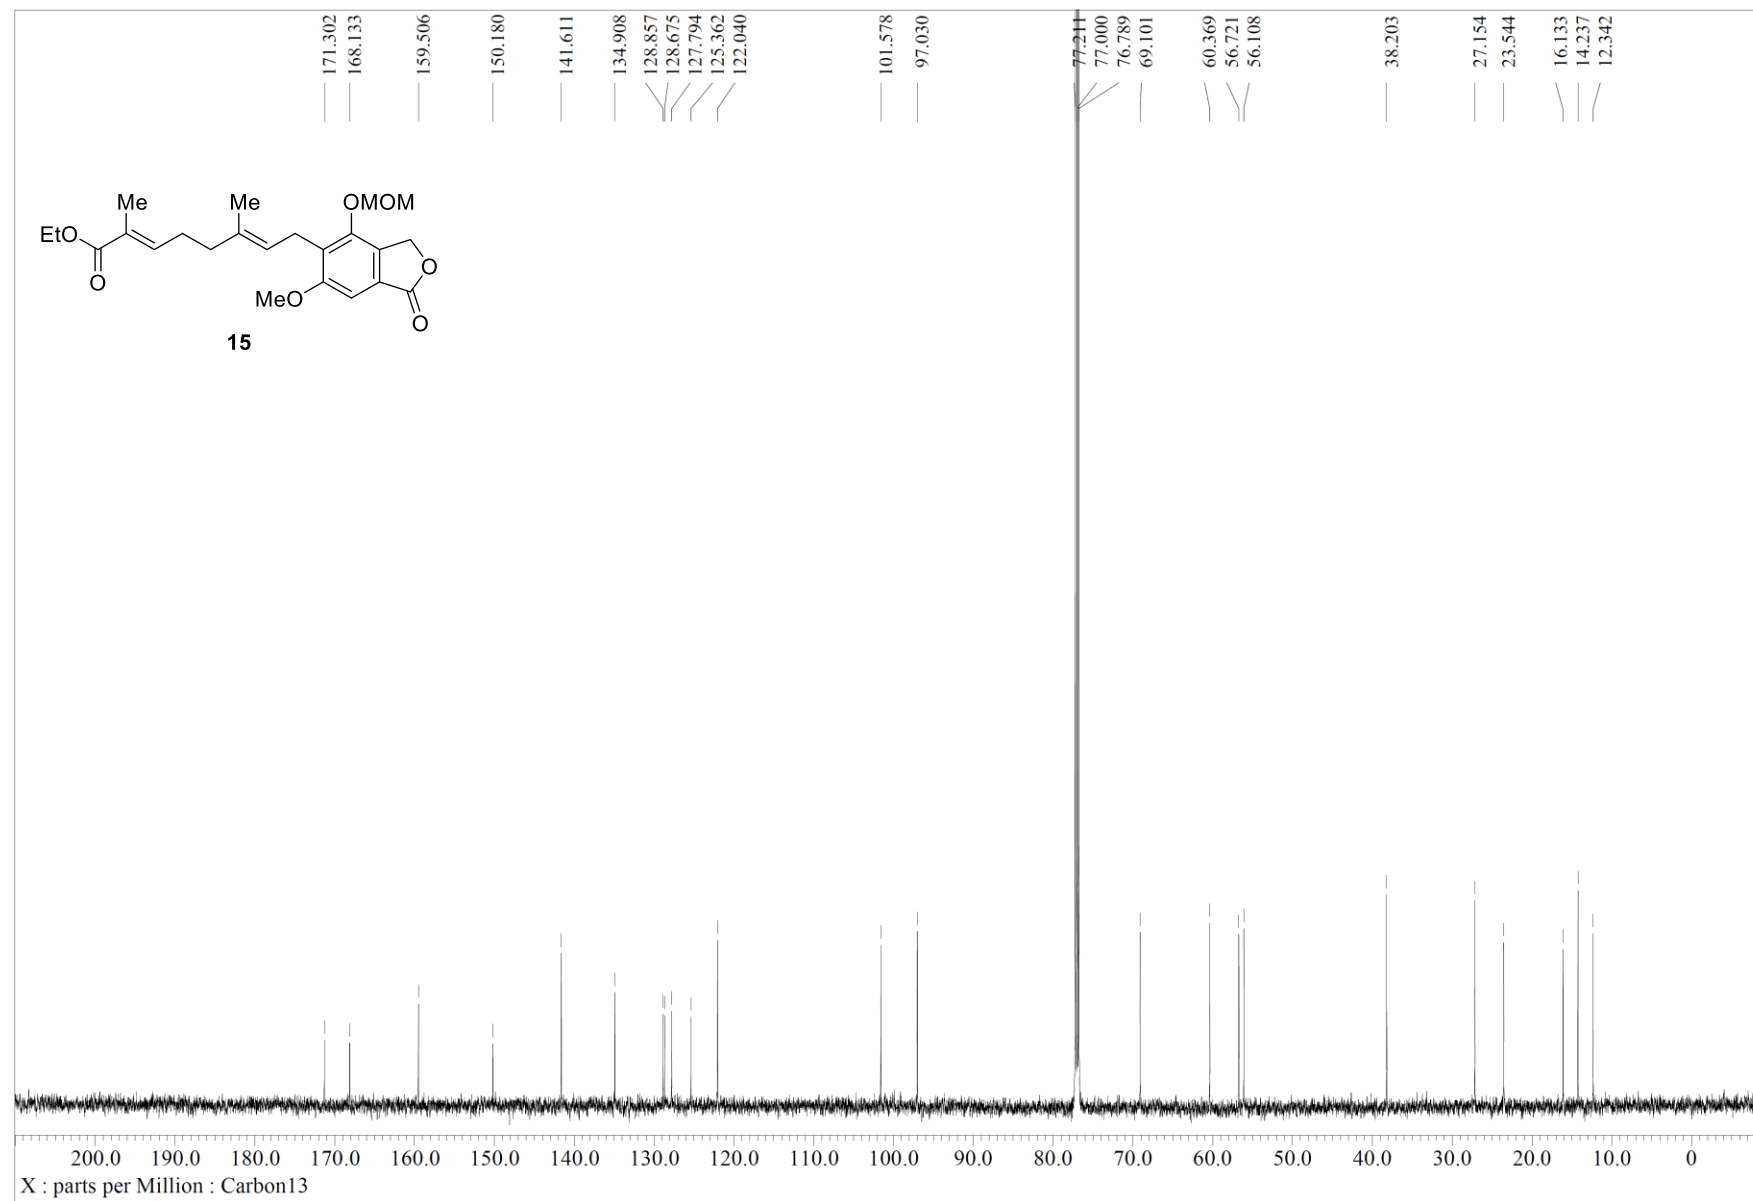

Figure S26. <sup>1</sup>H NMR spectrum (600 MHz, CDCl<sub>3</sub>) of compound 16.

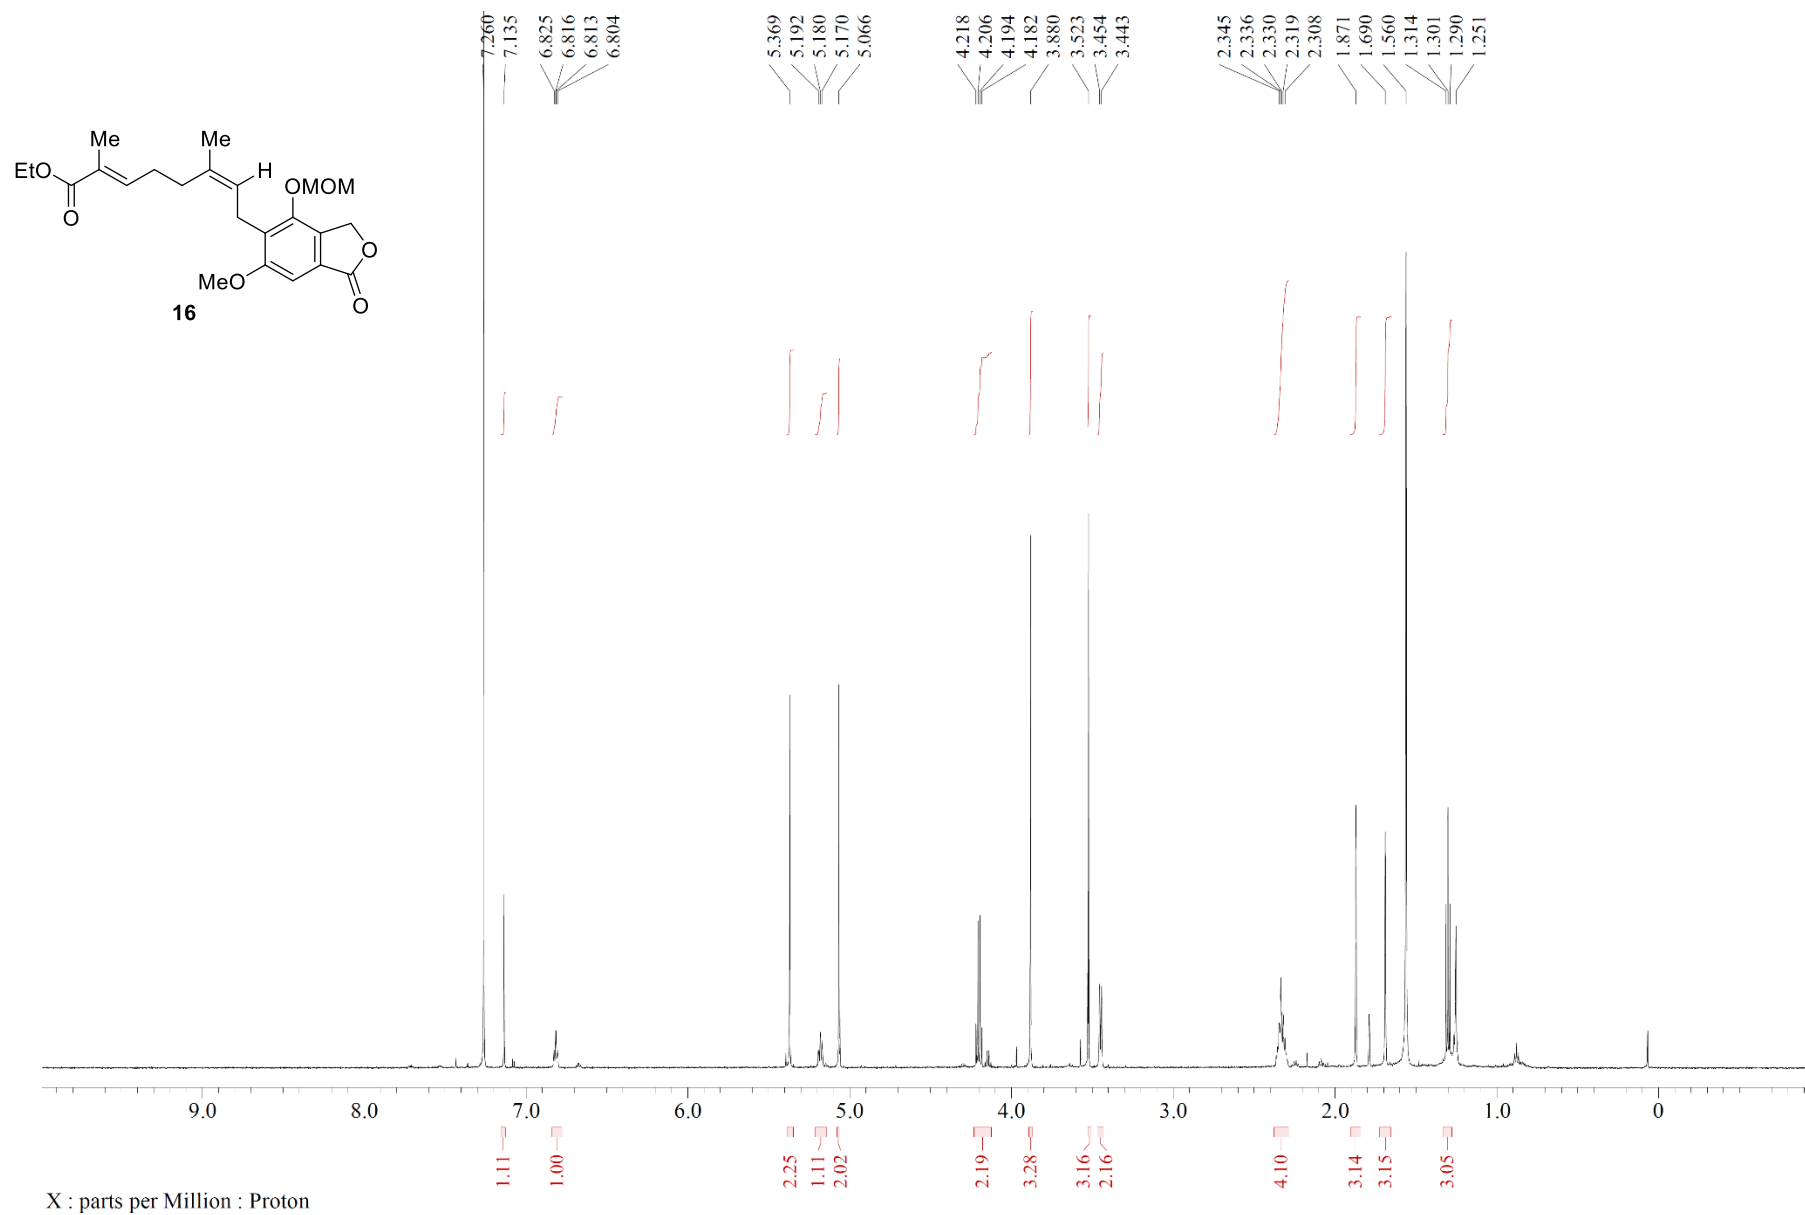

Figure S27.  $^{13}\text{C}$  NMR spectrum (150 MHz,  $\text{CDCl}_3$ ) of compound 16.

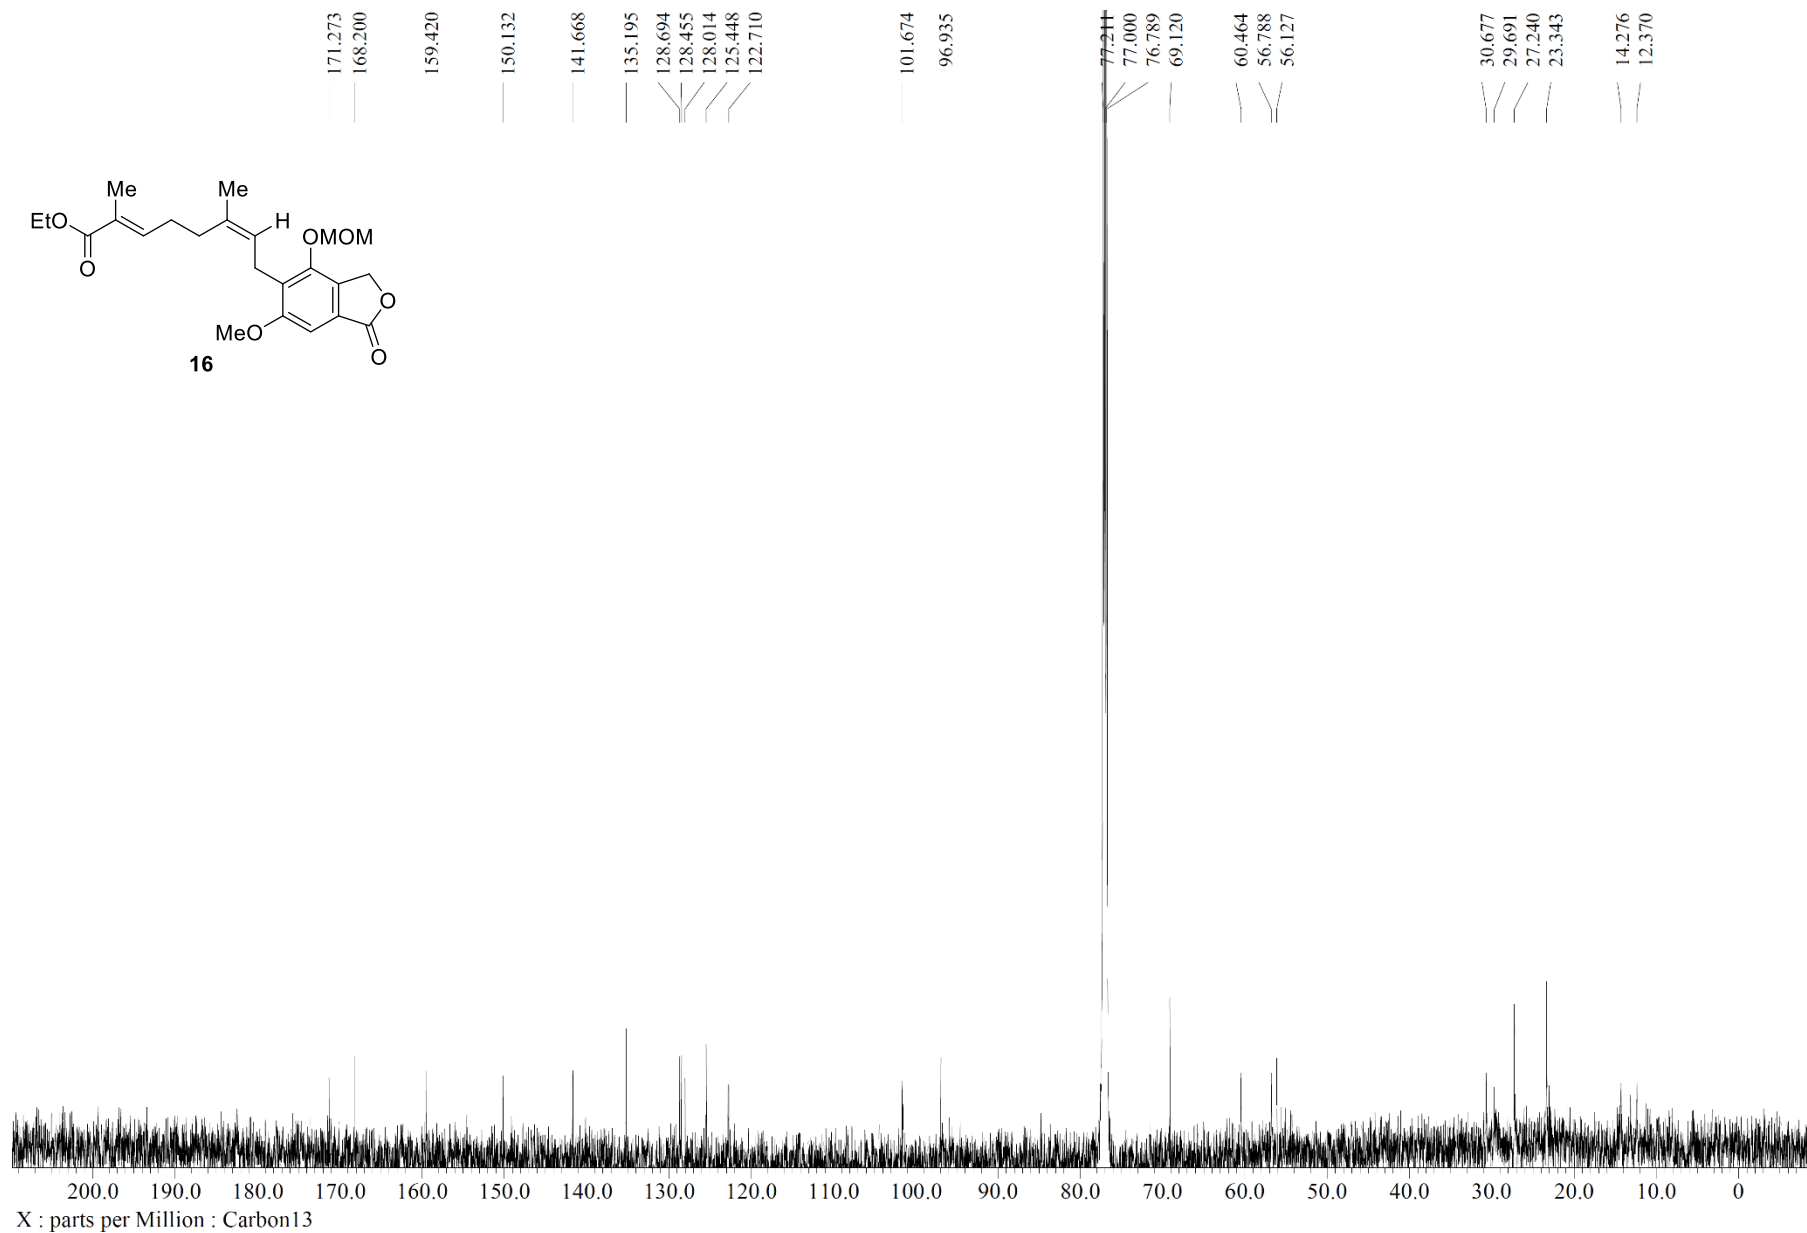

Figure S28. Difference NOE spectrum of 15.

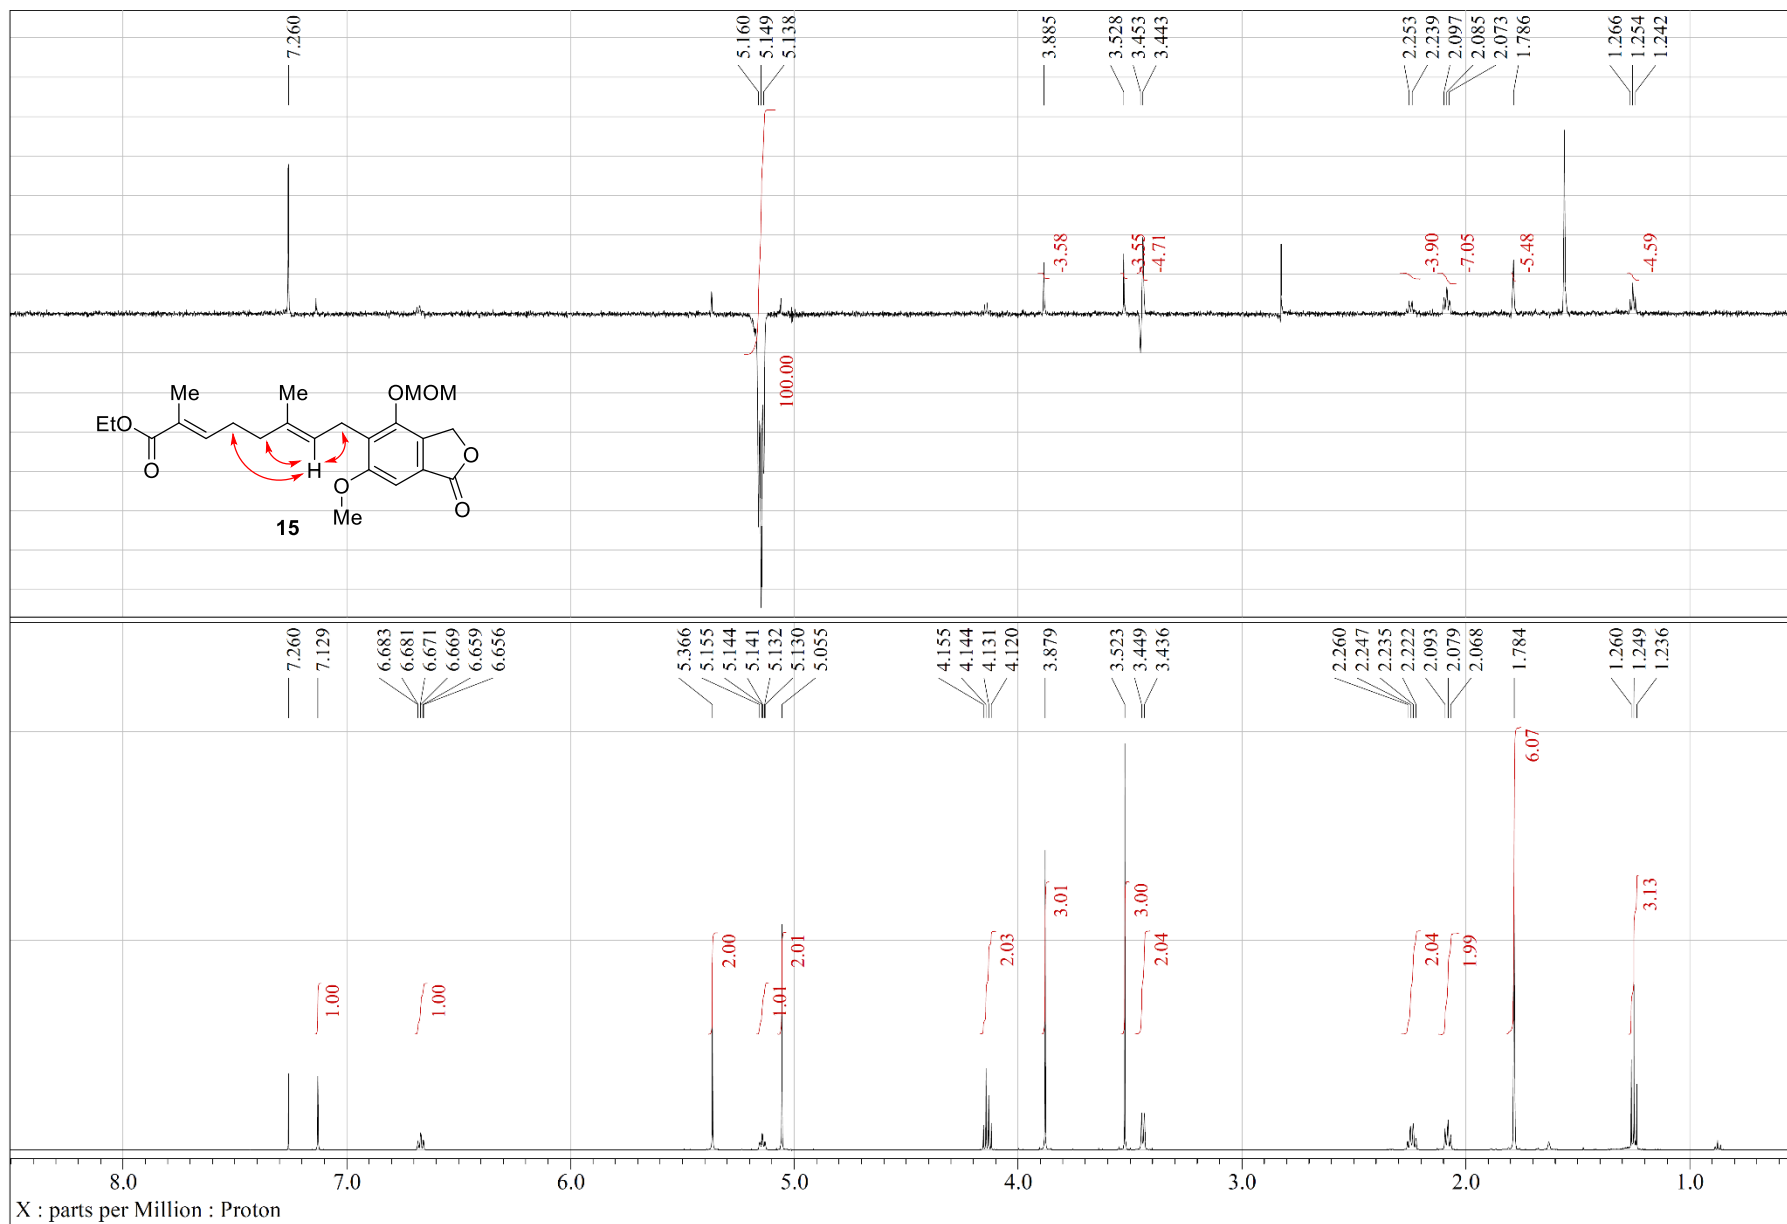

Figure S29. Difference NOE spectrum of 16.

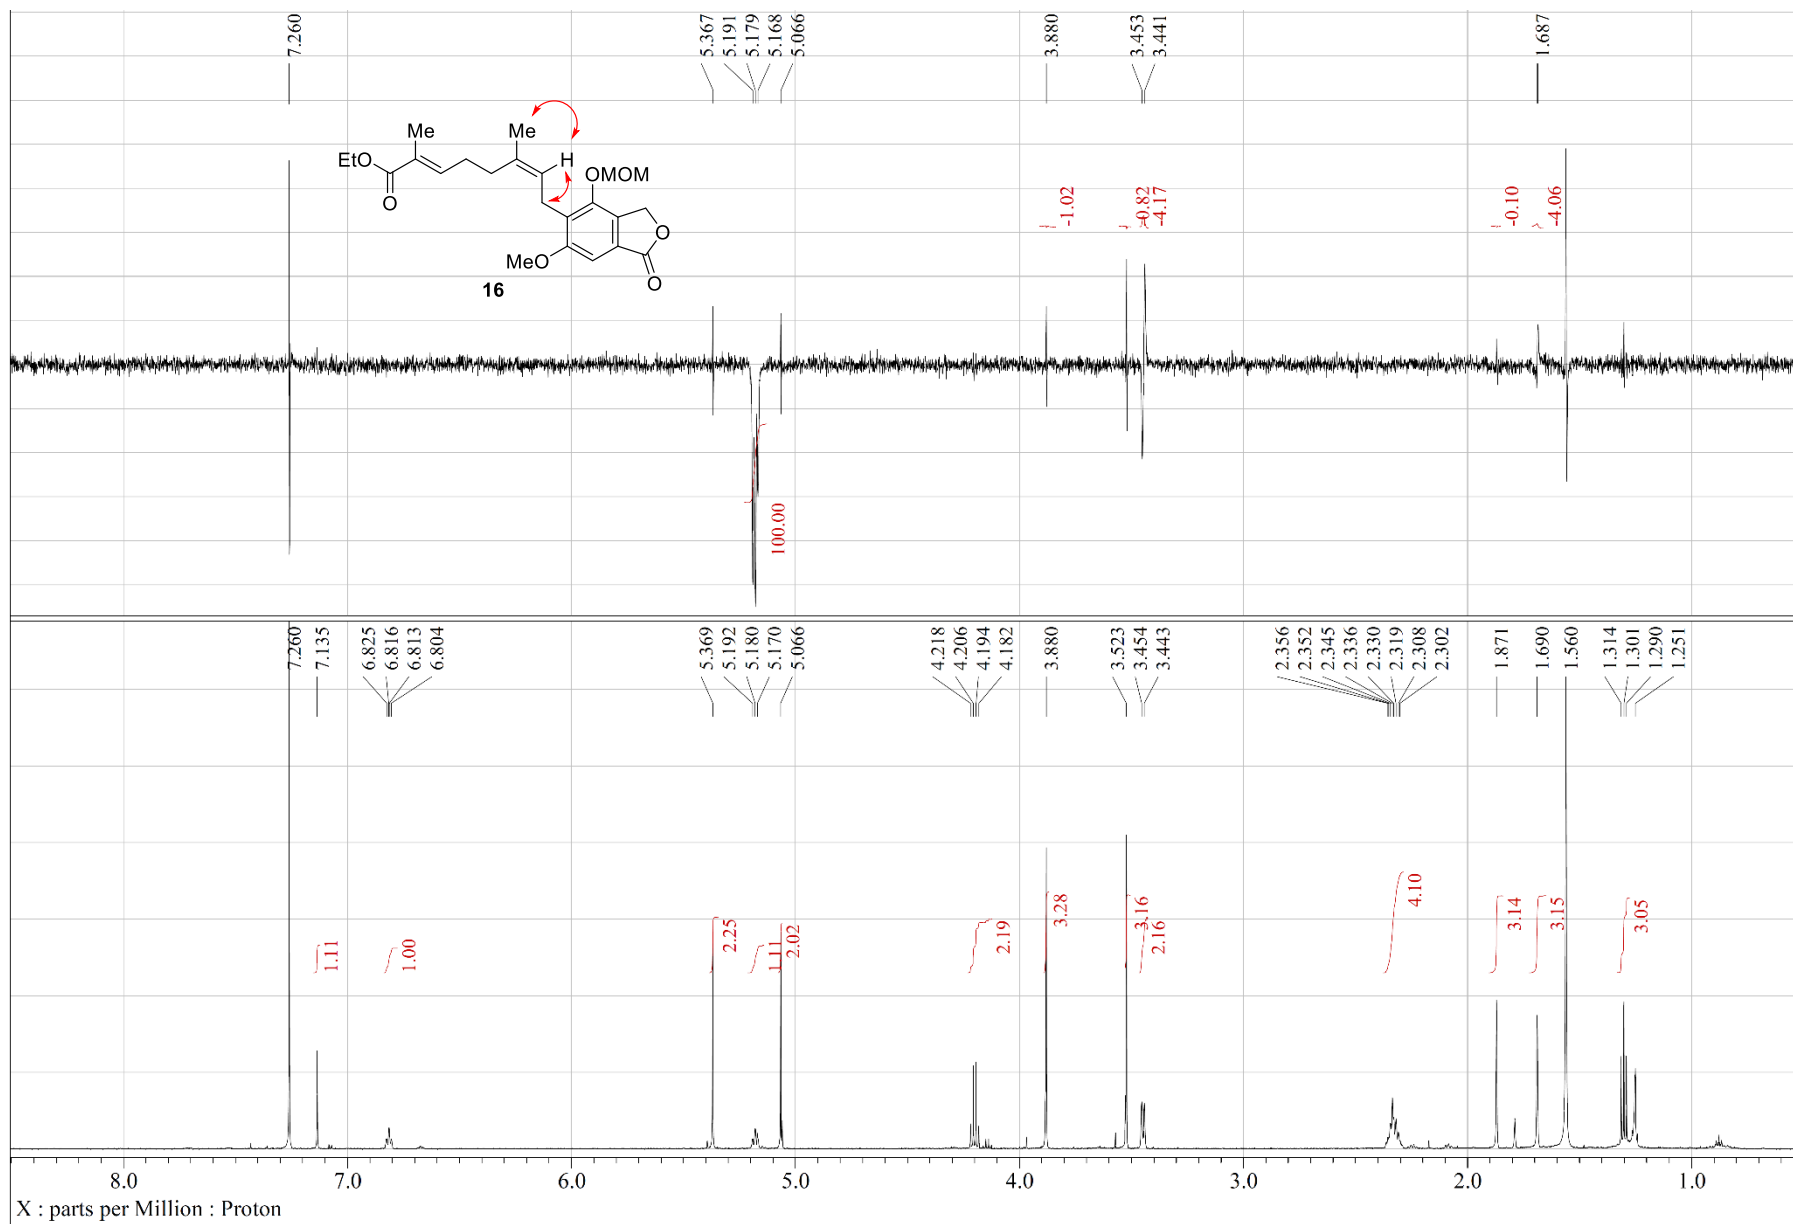

Figure S30. <sup>1</sup>H NMR spectrum (600 MHz, CDCl<sub>3</sub>) of compound 17.

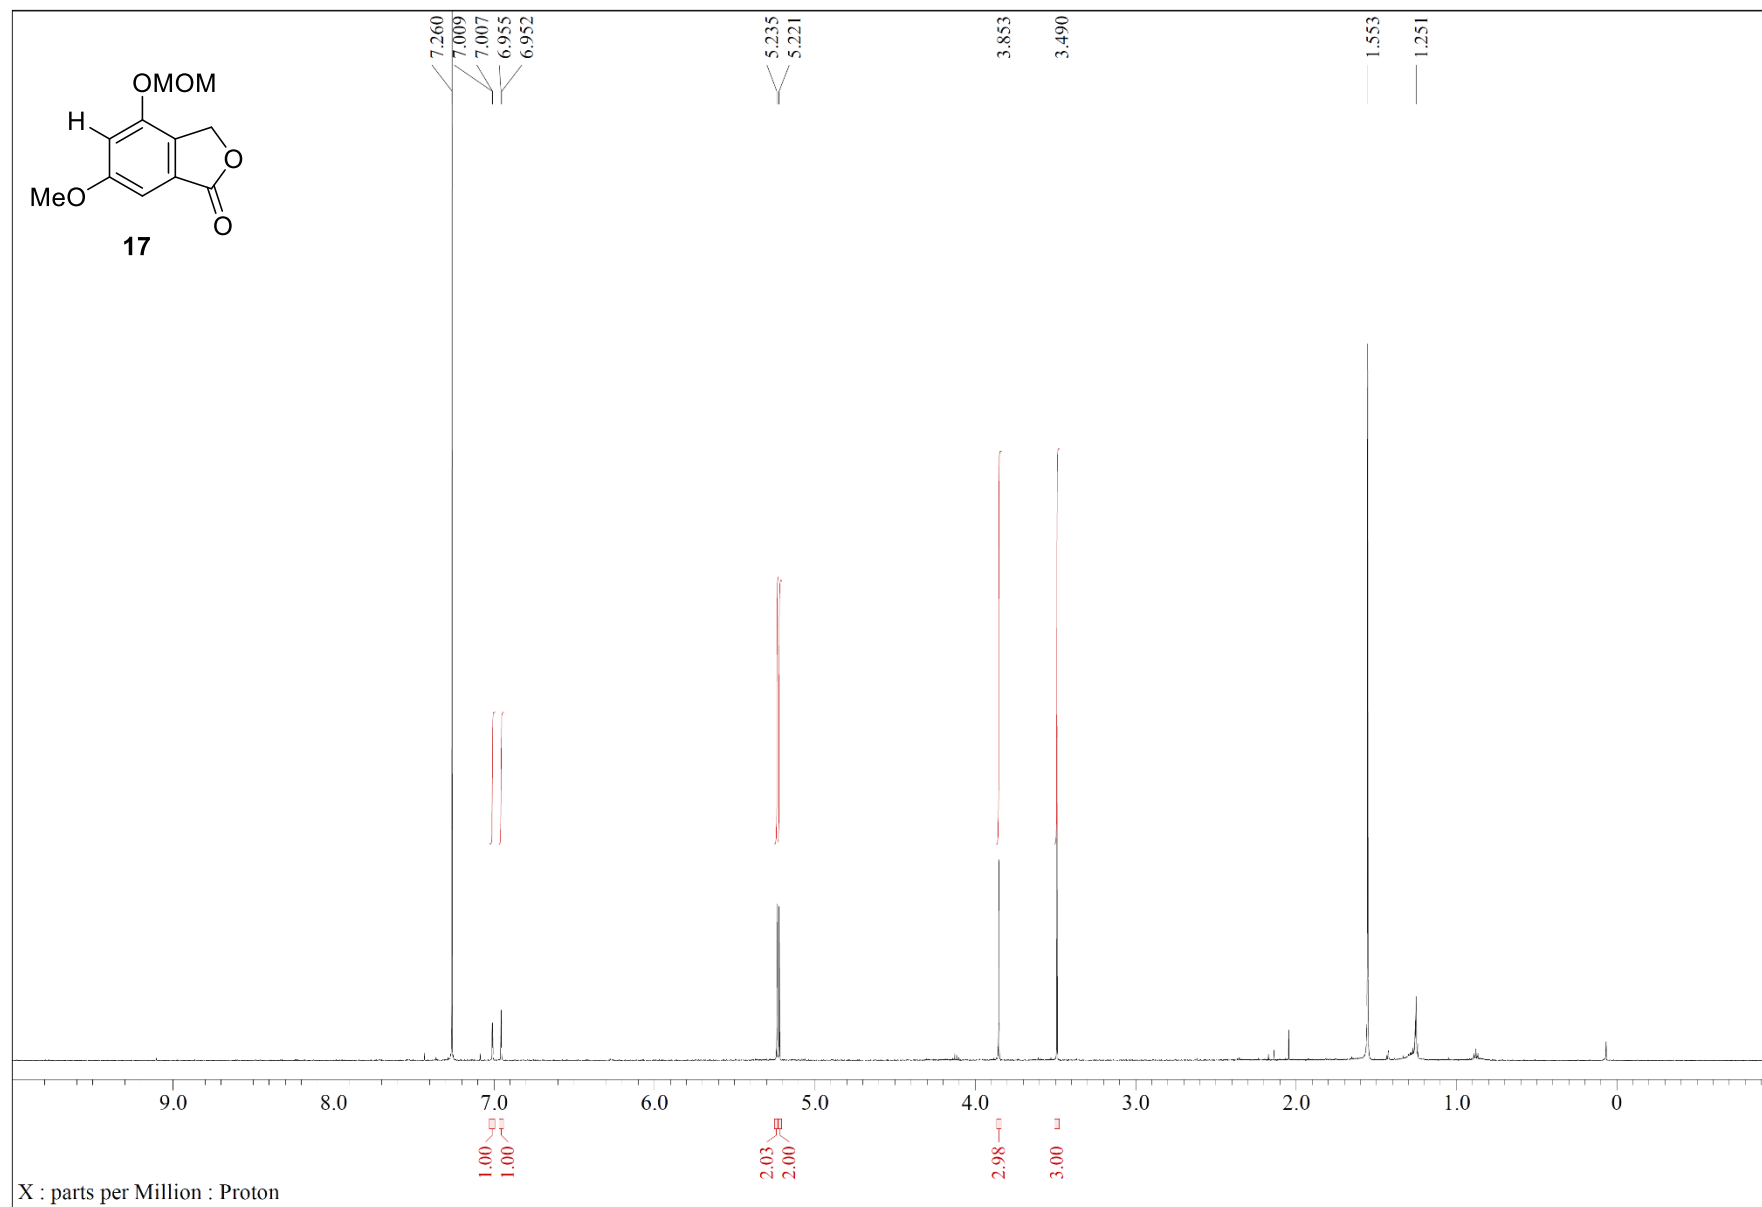



Figure S31. <sup>1</sup>H NMR spectrum (150 MHz, CDCl<sub>3</sub>) of compound 17.

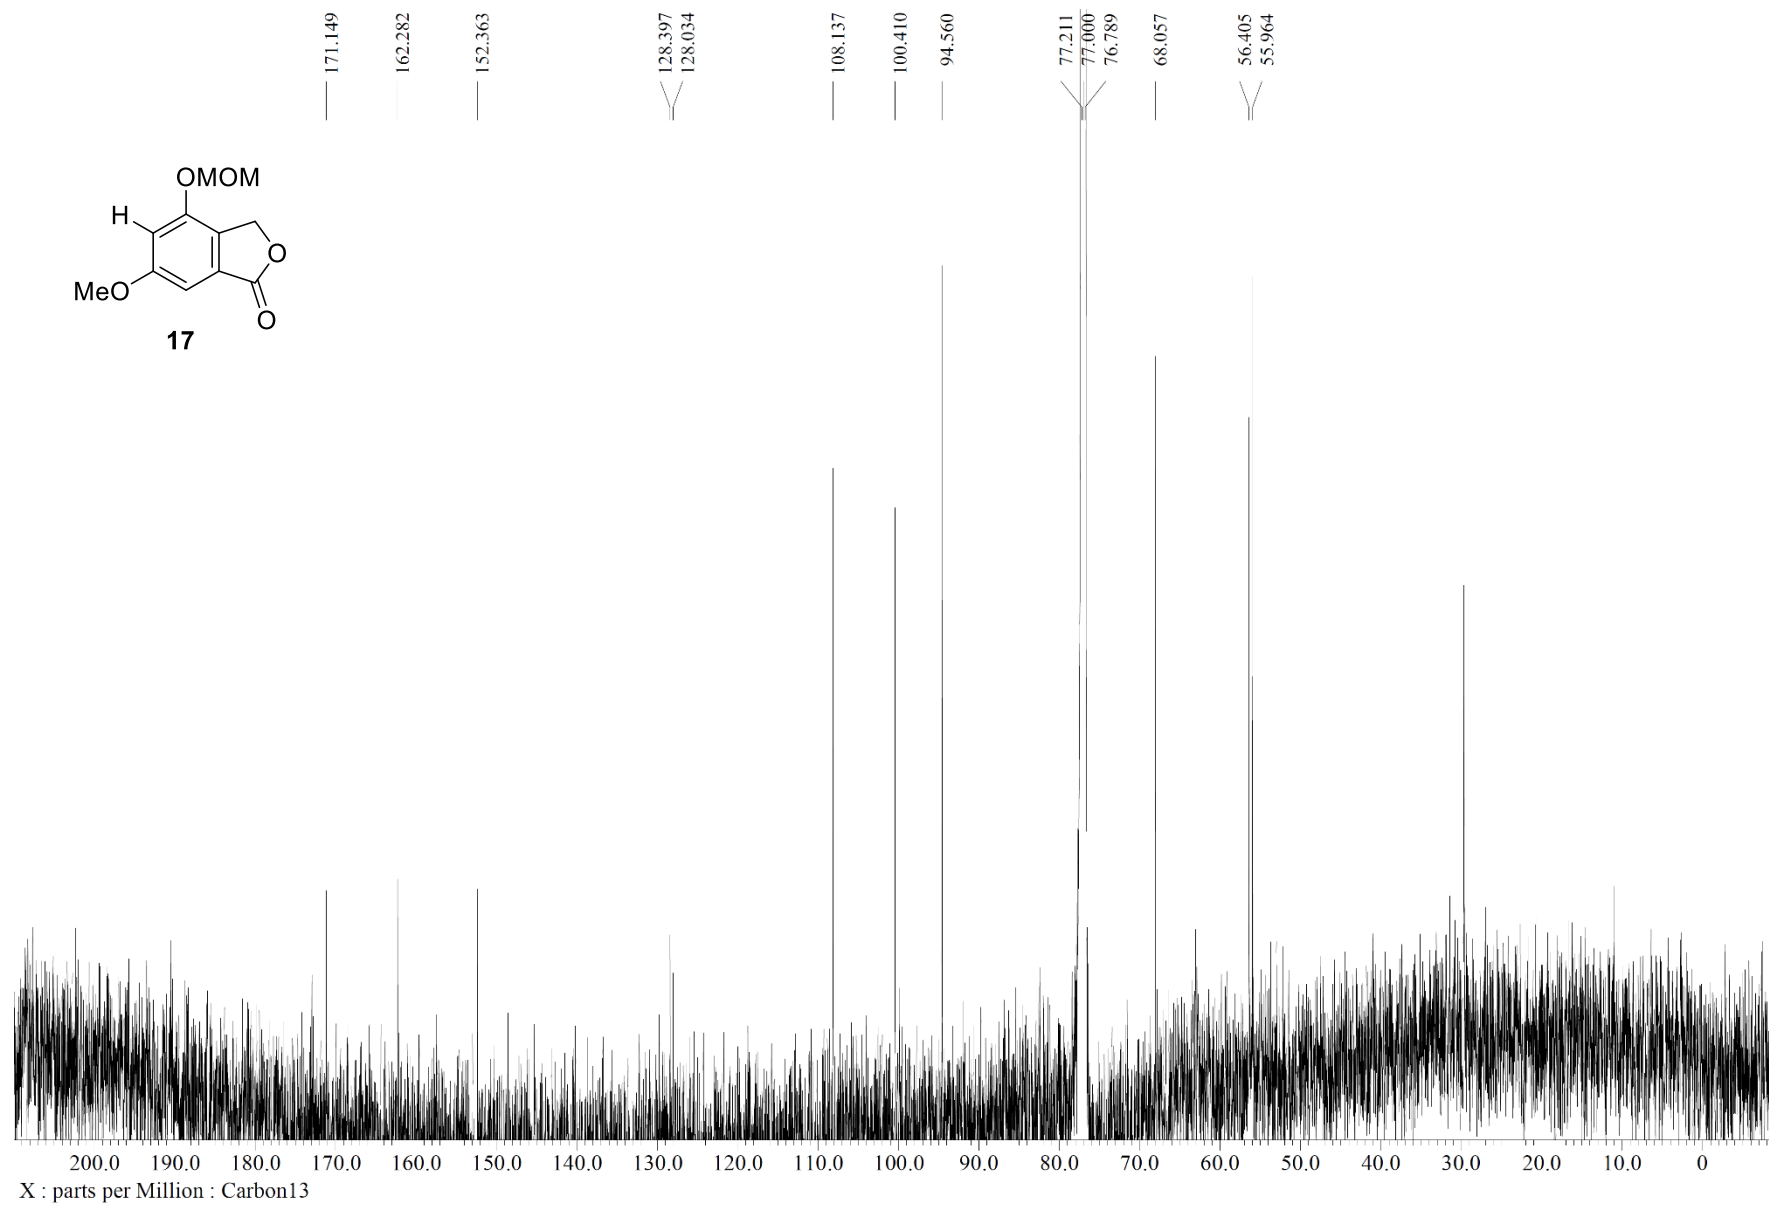

Figure S32. <sup>1</sup>H NMR spectrum (600 MHz, acetone-d<sub>6</sub>) of compound 1.

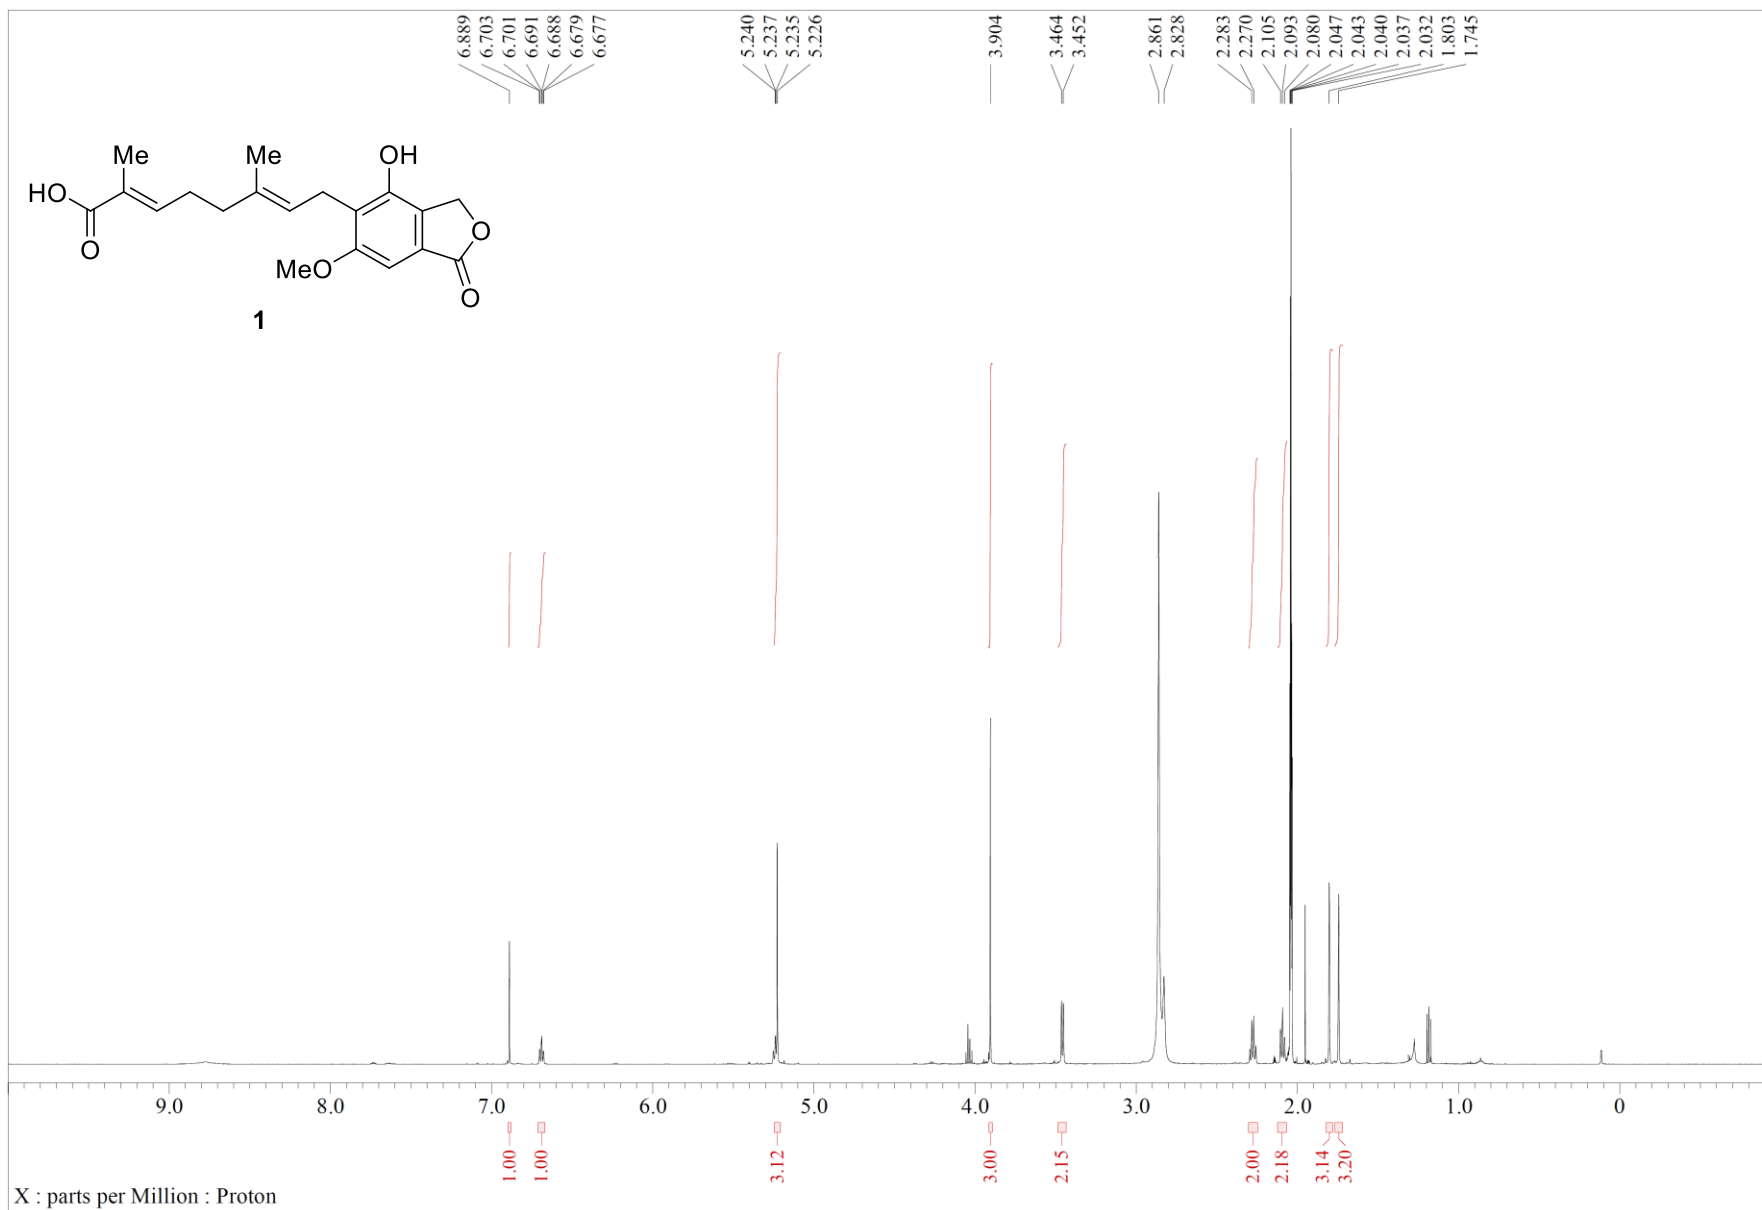

Figure S33.  $^{13}\text{C}$  NMR spectrum (150 MHz, acetone- $d_6$ ) of compound 1.

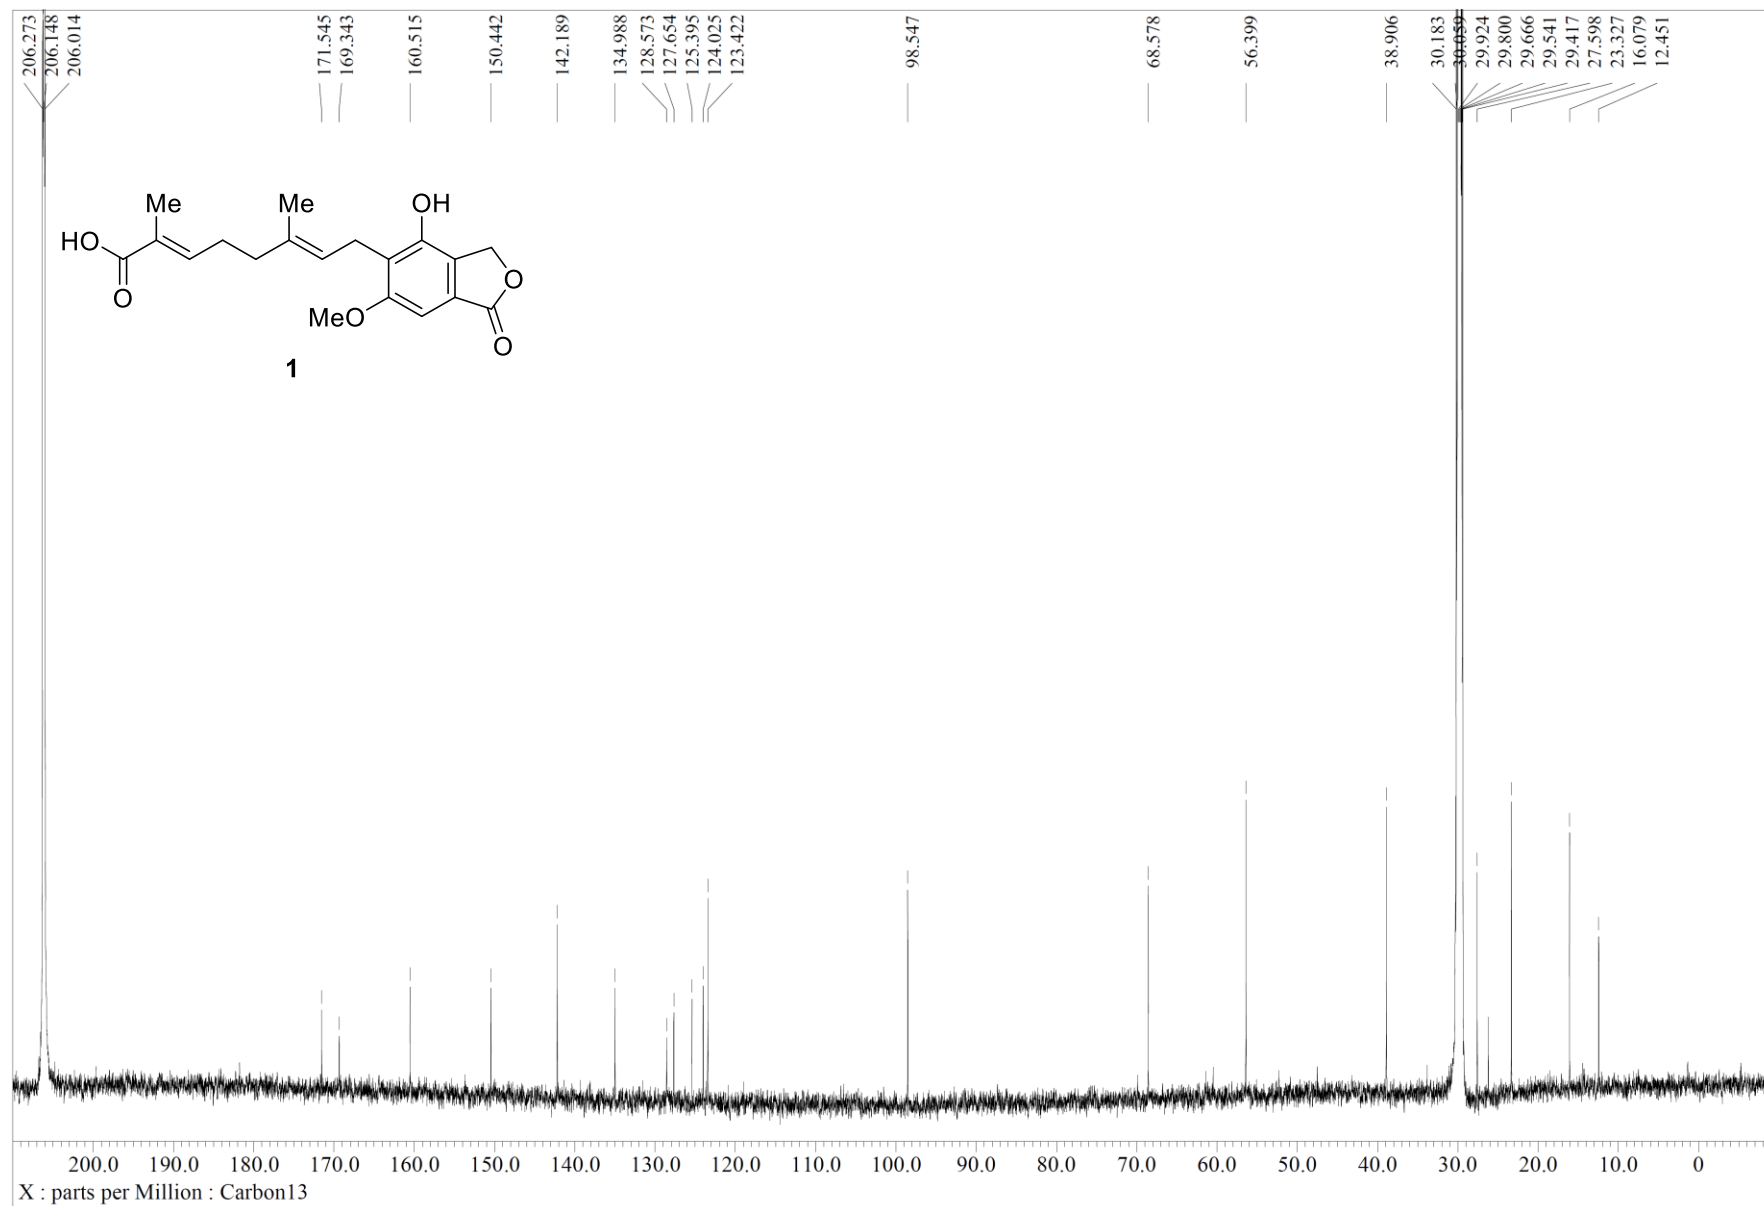

#### 4. References

- (S1) Fujikawa, K.; Sakano, K. Jpn. Kokai Tokkyo Koho JP 2010-285358 A 2010-12-24.
- (S2) Cao, W.; Chen, P.; Tang, Y. *J. Nat. Prod.* **2020**, *83*, 1701–1705.
- (S3) Botubol, J. M.; Durán-Peña, M. J.; Macías-Sánchez, A. J.; Hanson, J. R.; Collado, I. G.; Hernández-Galán, R. *J. Org. Chem.* **2014**, *79*, 11349–11358.
- (S4) Wittstein, K.; Rascher, M.; Rupcic, Z.; Löwen, E.; Winter, B.; Köster, R. W.; Stadler, M. *J. Nat. Prod.* **2016**, *79*, 2264–2269.
